# Supplementary material for: Palladium catalyzed regioselective elimination–hydrocarbonylation of propargylic alcohols
Source: Royal Society of Chemistry journal article supplement (doi:10.1039/c9cc03262b), 2019-01-01

## Supporting Information

### **Palladium Catalyzed Regioselective Elimination- Hydrocarbonylation of Propargylic Alcohols**

Yuan Yuan,<sup>†</sup> Minqiang Jia,<sup>†</sup> Wanli Zhang,<sup>\*†</sup> and Shengming Ma<sup>\*†‡</sup>

<sup>†</sup> Research Center for Molecular Recognition and Synthesis, Department of Chemistry, Fudan University, 220 Handan Lu, Shanghai 200433, P. R. China.

<sup>‡</sup> State Key Laboratory of Organometallic Chemistry, Shanghai Institute of Organic Chemistry, Chinese Academy of Sciences, 345 Lingling Lu, Shanghai 200032, P. R. China.

Email: [masm@sioc.ac.cn](mailto:masm@sioc.ac.cn)

|                                                                |          |
|----------------------------------------------------------------|----------|
| General information                                            | S2       |
| Screening of phosphoric acids                                  | S3       |
| Experimental details and analytical data                       | S4       |
| Reaction monitoring using substrate <b>1a</b>                  | S20      |
| Control experiments                                            | S21      |
| Synthetic applications                                         | S25      |
| References                                                     | S31      |
| <sup>1</sup> H and <sup>13</sup> C NMR spectra of the products | S32-S102 |

**General Information.** NMR spectra were taken with an Agilent-400 spectrometer (400 MHz for  $^1\text{H}$  NMR, 100 MHz for  $^{13}\text{C}$  NMR) in  $\text{CDCl}_3$ ,  $\text{DMSO-}d_6$ ,  $\text{C}_6\text{D}_6$  or  $(\text{CD}_3)_2\text{CO}$ . All  $^1\text{H}$  NMR experiments were measured with tetramethylsilane (0 ppm) in  $\text{CDCl}_3$  or the signal of residual  $\text{C}_6\text{H}_6$  (7.16 ppm) in  $\text{C}_6\text{D}_6$  or the signal of residual DMSO (2.50 ppm) in  $\text{DMSO-}d_6$  as the internal reference;  $^{13}\text{C}$  NMR experiments were measured in relative to the signal of  $\text{CDCl}_3$  (77.0 ppm) or the signal of  $\text{DMSO-}d_6$  (39.52 ppm) or the signal of  $(\text{CD}_3)_2\text{CO}$  (29.84 ppm). All reactions were carried out in flame-dried Schlenk tubes.  $[(\pi\text{-allyl})\text{PdCl}]_2$  was purchased from J&K Chemicals; BINAP was purchased from Shanghai 9dingchem Co., Ltd.;  $(\text{PhO})_2\text{POOH}$  was purchased from Energy Chemical and purified through stirring with 1 M HCl, extracting with dichloromethane, and removing solvents under vacuum or purchased from Shanghai aladdin Biochemical Technology Co., Ltd. without purification;  $^n\text{BuLi}$  was purchased from Energy Chemical and Infinity Scientific (Beijing) Co. Ltd.. Toluene was dried over sodium wire with benzophenone as the indicator and distilled freshly before use. The reaction should be conducted in a hood working efficiently due to the toxicity of CO gas. All the temperatures are referred to the oil baths used. Recoveries of substrates were determined by  $^1\text{H}$  NMR analysis of the crude product using dibromomethane or 1,3,5-trimethylbenzene as the internal standard. Column chromatography was conducted on 300-400 mesh silica gel purchased from Huanghai chemicals or Biotage Isolera One flash chromatography purification system using flash silica gel column (12 g) purchased from Santai Tech. Inc.. Petroleum ether (b.p. 60-90 °C) purchased from Shanghai Titan Scientific Co., Ltd. was used for chromatography. The starting propargylic alcohols were synthesized according to the reported procedures.<sup>1</sup>

**Table S1 Screening of Brønsted acids<sup>a</sup>**

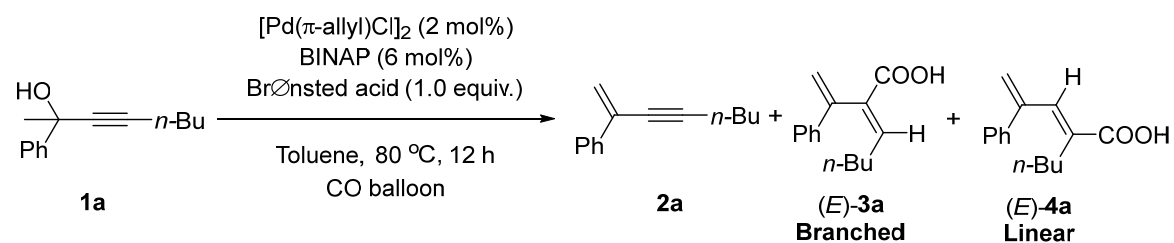

| Entry | Brønsted acid                      | NMR yield <sup>b</sup> (%) |               |               | Recovery <sup>b</sup> of <b>1a</b> (%) |
|-------|------------------------------------|----------------------------|---------------|---------------|----------------------------------------|
|       |                                    | <b>2a</b>                  | <b>(E)-3a</b> | <b>(E)-4a</b> |                                        |
| 1     | (PhO) <sub>2</sub> POOH            | 0                          | 79            | 1             | 1                                      |
| 2     | ( <i>n</i> -BuO) <sub>2</sub> POOH | 3                          | 0             | 9             | 13                                     |
| 3     | Ph <sub>2</sub> POOH               | 1                          | 2             | 5             | 0                                      |
| 4     | Acid 1                             | 21                         | 26            | 7             | 5                                      |
| 5     | H <sub>3</sub> PO <sub>3</sub>     | 55                         | 0             | 0             | 0                                      |
| 6     | HPO <sub>3</sub>                   | 1                          | 0             | 0             | 99                                     |
| 7     | CH <sub>3</sub> COOH               | 0                          | 0             | 0             | 37                                     |
| 8     | CF <sub>3</sub> COOH               | 24                         | 0             | 0             | 0                                      |

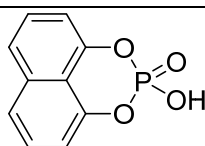

**Acid 1**

<sup>a</sup> **Reaction conditions:** **1a** (1.0 mmol),  $[\text{Pd}(\pi\text{-allyl})\text{Cl}]_2$  (2 mol%), BINAP (6 mol%), and Brønsted acid (1.0 equiv.) in toluene (5 mL) at 80 °C under 1 atm. of CO unless otherwise noted. <sup>b</sup> Determined by <sup>1</sup>H NMR analysis of the crude product using dibromomethane as the internal standard.

## Experimental details and analytical data

### 1. Synthesis of propargylic alcohols

#### (1) Preparation of 4-(3-Methylphenyl)-2-phenylbut-3-yn-2-ol (**1g**) (Yy-2-078)

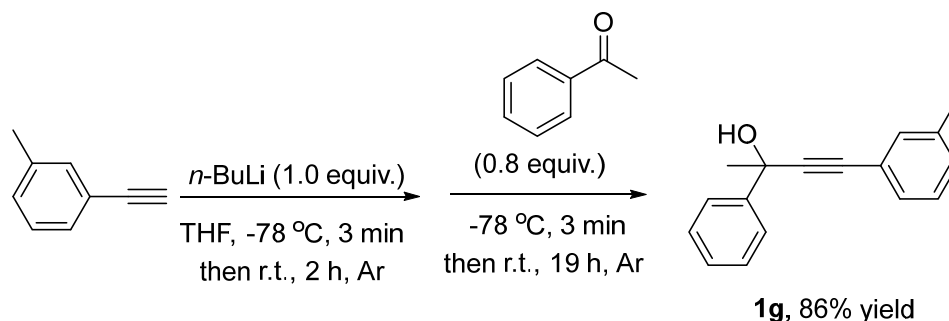

**Typical Procedure I:** <sup>1</sup> To an oven-dried flask (100 mL) were added (3-methylphenyl)acetylene (2.65 mL,  $d = 0.900$  g/mL, 2.3850 g, 20 mmol) and THF (50 mL) under argon. Then a solution of *n*BuLi (2.5 M in hexane, 8 mL, 20 mmol) was added dropwise at  $-78$  °C within 3 min under argon. Then the cooling bath was removed and the mixture was stirred at room temperature for 2 h. Acetophenone (1.90 mL,  $d = 1.03$  g/mL, 1.9570 g, 16 mmol) was then added dropwise at  $-78$  °C within 3 min. The resulting mixture was warmed up to room temperature, stirred for 19 h, and quenched with a saturated aqueous solution of  $\text{NH}_4\text{Cl}$  (20 mL). After extraction with ethyl acetate (20 mL x 3), the organic layer was dried over anhydrous  $\text{Na}_2\text{SO}_4$ . After filtration and concentration under reduced pressure, the crude product was purified by column chromatography on silica gel to afford **1g** (3.2544 g, 86%) (eluent: petroleum ether /dichloromethane/ethyl ether = 60/1/1) as a yellow solid: m.p.  $47.5 - 48.0$  °C (petroleum ether/ethyl acetate);  $^1\text{H NMR}$  (400 MHz,  $\text{CDCl}_3$ )  $\delta = 7.78-7.67$  (m, 2 H, Ar-H), 7.43-7.34 (m, 2 H, Ar-H), 7.34-7.25 (m, 3 H, Ar-H), 7.20 (t,  $J = 7.6$  Hz, 1 H, Ar-H), 7.13 (d,  $J = 7.2$  Hz, 1 H, Ar-H), 2.53 (s, 1 H, OH), 2.32 (s, 3 H,  $\text{CH}_3$ ), 1.86 (s, 3 H,  $\text{CH}_3$ );  $^{13}\text{C NMR}$  (100 MHz,  $\text{CDCl}_3$ )  $\delta = 145.7, 138.0, 132.3, 129.3, 128.8, 128.3, 128.2, 127.7, 125.0, 122.3, 92.1, 85.1, 70.4, 33.3, 21.2$ ; **IR** (neat):  $\nu = 3292$  (br), 2986, 2926, 1599, 1580, 1484, 1365, 1221, 1087, 1051  $\text{cm}^{-1}$ ; **MS** (70 eV, EI)  $m/z$  (%): 237 ( $\text{M}^+ + 1$ , 2.28) 236 ( $\text{M}^+$ , 14.21), 221 (100); **Anal.** calcd for  $\text{C}_{17}\text{H}_{16}\text{O}$ : C 86.40, H 6.82; Found: C 86.44, H 6.73.

The following compounds were prepared according to **Typical Procedure I**.

## (2) Preparation of 2-(3-methoxyphenyl)dec-3-yn-2-ol (**1n**) (Yy-2-070)

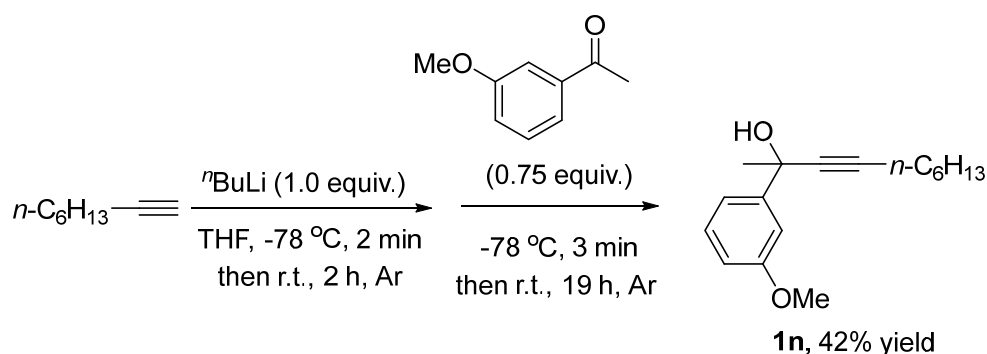

The reaction of 1-octyne (3.0 mL,  $d = 0.746\text{ g/mL}$ , 2.2380 g, 20 mmol)/THF (50 mL),  $n\text{BuLi}$  (2.5 M in hexane, 8 mL, 20 mmol), and 3-methoxyacetophenone (2.1 mL,  $d = 1.094\text{ g/mL}$ , 2.2974 g, 15 mmol) afforded **1n** (1.6462 g, 42%) (eluent: petroleum ether/ethyl ether/ $\text{CH}_2\text{Cl}_2 = 20/1/1$ ) as a colorless oil:  **$^1\text{H NMR}$**  (400 MHz,  $\text{CDCl}_3$ )  $\delta = 7.31\text{-}7.17$  (m, 3 H, Ar-H), 6.82 (dt,  $J_1 = 7.2\text{ Hz}$ ,  $J_2 = 2.1\text{ Hz}$ , 1 H, Ar-H), 3.82 (s, 3 H,  $\text{OCH}_3$ ), 2.40-2.30 (m, 1 H, OH), 2.27 (t,  $J = 7.2\text{ Hz}$ , 2 H,  $\text{CH}_2$ ), 1.73 (s, 3 H,  $\text{CH}_3$ ), 1.60-1.48 (m, 2 H,  $\text{CH}_2$ ), 1.46-1.36 (m, 2 H,  $\text{CH}_2$ ), 1.35-1.24 (m, 4 H,  $\text{CH}_2 \times 2$ ), 0.89 (t,  $J = 6.8\text{ Hz}$ , 3 H,  $\text{CH}_3$ );  **$^{13}\text{C NMR}$**  (100 MHz,  $\text{CDCl}_3$ )  $\delta = 159.4, 148.0, 129.2, 117.4, 112.9, 110.8, 85.7, 83.6, 70.0, 55.2, 33.5, 31.3, 28.57, 28.55, 22.5, 18.7, 14.0$ ; **IR** (neat):  $\nu = 3425$  (br), 2929, 2858, 2242, 1600, 1485, 1432, 1257, 1159, 1043  $\text{cm}^{-1}$ ; **MS** (70 eV, EI)  $m/z$  (%): 261 ( $\text{M}^+ + 1$ , 3.89), 260 ( $\text{M}^+$ , 21.47), 245 (100); **HRMS** calcd for  $\text{C}_{17}\text{H}_{24}\text{O}_2$  [ $\text{M}^+$ ]: 260.1776; Found: 260.1778.

## (3) Preparation of 2-(2-naphthyl)dec-3-yn-2-ol (**1o**) (Yy-2-050)

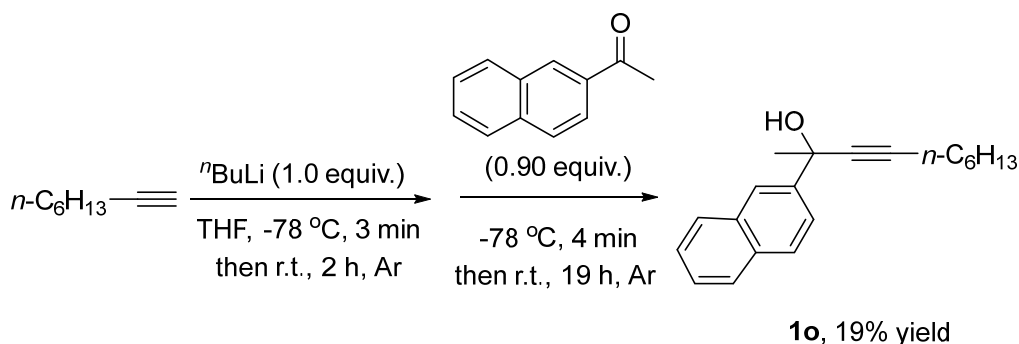

The reaction of 1-octyne (3.0 mL,  $d = 0.746\text{ g/mL}$ , 2.2380 g, 20.0 mmol)/THF (50 mL),  $n\text{BuLi}$  (2.5 M in hexane, 8 mL, 20.0 mmol), and 2-acetonaphthone (3.1263 g, 18 mmol)/THF (20 mL) afforded **1o** (0.9534 g, 19%) (eluent: petroleum ether/ethyl

acetate = 100/1) as a yellow oil:  $^1\text{H NMR}$  (400 MHz,  $\text{CDCl}_3$ )  $\delta$  = 8.11 (s, 1 H, Ar-H), 7.90-7.77 (m, 3 H, Ar-H), 7.74 (dd,  $J_1 = 8.4$  Hz,  $J_2 = 1.6$  Hz, 1 H, Ar-H), 7.53-7.38 (m, 2 H, Ar-H), 2.48 (s, 1 H, OH), 2.29 (t,  $J = 7.0$  Hz, 2 H,  $\text{CH}_2$ ), 1.82 (s, 3 H,  $\text{CH}_3$ ), 1.65-1.50 (m, 2 H,  $\text{CH}_2$ ), 1.50-1.38 (m, 2 H,  $\text{CH}_2$ ), 1.38-1.24 (m, 4 H,  $\text{CH}_2 \times 2$ ), 0.89 (t,  $J = 6.8$  Hz, 3 H,  $\text{CH}_3$ );  $^{13}\text{C NMR}$  (100 MHz,  $\text{CDCl}_3$ )  $\delta$  = 143.5, 133.0, 132.8, 128.3, 128.0, 127.5, 126.1, 125.9, 123.7, 123.3, 85.9, 83.8, 70.1, 33.4, 31.3, 28.59, 28.56, 22.5, 18.8, 14.0; **IR** (neat):  $\nu = 3378$  (br), 3055, 2926, 2858, 2240, 1457, 1359, 1196, 1084  $\text{cm}^{-1}$ ; **MS** (70 eV, EI)  $m/z$  (%): 280 ( $\text{M}^+$ , 1.46), 105 (100); **HRMS** calcd for  $\text{C}_{20}\text{H}_{24}\text{O}$  [ $\text{M}^+$ ]: 280.1827; Found: 280.1830.

## 2. Preparation of 2-phenyloct-3-yn-2-yl methyl ether (**5**) (Yy-2-121)

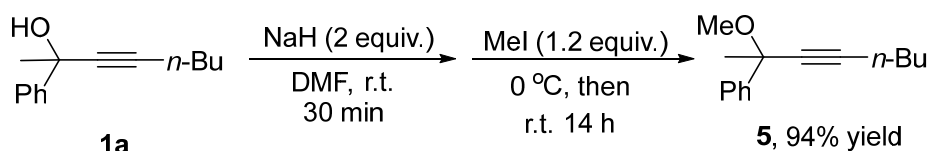

To a flame-dried Schlenk tube were added NaH (400 mg, 10 mmol) in a glove box, followed by the addition of 2 mL of DMF. Then **1a** (1.0074 g, 5 mmol) in DMF (3 mL) was added slowly within 5 min. After being stirred at room temperature for 30 min, the Schlenk tube was cooled to 0 °C with a water/ice bath for 5 min before MeI (0.37 mL,  $d = 2.28$  g/mL, 843.6 mg, 6 mmol) was added. The resulting mixture was stirred at room temperature for 14 h and then the reaction was cooled to 0 °C with a water/ice bath for 5 min before quenched with a saturated aqueous solution of NaCl (10 mL). After extraction with  $\text{Et}_2\text{O}$  (10 mL  $\times$  3), the organic layer was combined and washed with  $\text{H}_2\text{O}$  (20 mL  $\times$  6) to remove DMF. The organic layer was dried over anhydrous  $\text{MgSO}_4$ . After filtration and concentration under reduced pressure, the crude product was purified by column chromatography on silica gel to afford **5** (1.0165 g, 94%) (eluent: petroleum ether/ethyl ether = 50/1) as a colorless oil:  $^1\text{H NMR}$  (400 MHz,  $\text{CDCl}_3$ )  $\delta$  = 7.64-7.55 (m, 2 H, Ar-H), 7.38-7.30 (m, 2 H, Ar-H), 7.30-7.22 (m, 1 H, Ar-H), 3.19 (s, 3 H,  $\text{OCH}_3$ ), 2.34 (t,  $J = 7.0$  Hz, 2 H,  $\text{CH}_2$ ), 1.69 (s, 3 H,  $\text{CH}_3$ ), 1.64-1.42 (m, 4 H,  $\text{CH}_2 \times 2$ ), 0.94 (t,  $J = 7.4$  Hz, 3 H,  $\text{CH}_3$ );  $^{13}\text{C NMR}$

(100 MHz, CDCl<sub>3</sub>)  $\delta$  = 143.2, 128.1, 127.5, 126.0, 88.1, 79.9, 76.5, 52.1, 32.9, 30.8, 21.9, 18.4, 13.5; **IR** (neat):  $\nu$  = 3455, 2924, 2854, 2232, 1489, 1449, 1329, 1140, 1002 cm<sup>-1</sup>; **MS** (ESI)  $m/z$  (%): 217 (M+H)<sup>+</sup>, 185 (M-OMe)<sup>+</sup>; **HRMS** calcd for C<sub>15</sub>H<sub>21</sub>O<sup>+</sup> (M+H)<sup>+</sup>: 217.1587; Found: 217.1586.

### 3. Synthesis of 1,3-dien-3-yl carboxylic acids

#### (1) Preparation of (*E*)-2-(1-phenylvinyl)hept-2-enoic acid [(*E*)-**3a**] (Yy-2-009, Yy-1-183)

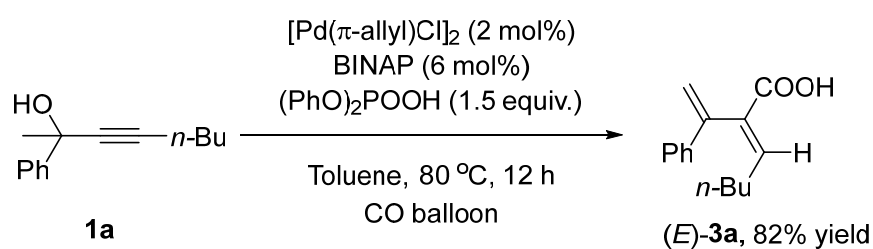

**Typical Procedure II:** To a flame-dried Schlenk tube were added [Pd( $\pi$ -allyl)Cl]<sub>2</sub> (7.5 mg, 0.02 mmol), BINAP (39.3 mg, 0.06 mmol), and (PhO)<sub>2</sub>POOH (387.1 mg, 1.5 mmol) sequentially under argon. After addition of each chemical, the flask was degassed and refilled with Ar. Then **1a** (202.1 mg, 1 mmol)/toluene (5 mL) was added under argon. The resulting mixture was subsequently frozen with a liquid nitrogen bath, degassed to remove the argon inside completely, and refilled with CO by a balloon of CO for three times. Then the resulting mixture was stirred at 80 °C with a balloon of CO for 12 h. After that, the resulting mixture was diluted with 5 mL of ethyl acetate, filtered through a short column of silica gel (2 cm) eluted with ethyl acetate (10 mL x 3), and concentrated. The residue was purified by column chromatography on silica gel to afford impure (*E*)-**3a** (200.5 mg) [eluent: petroleum ether/dichloromethane/ethyl ether = 20/1/1], which was recrystallized (petroleum ether/dichloromethane) to afford pure (*E*)-**3a** (189.5 mg, 82%) as a yellow solid: m.p. 72.6-73.2 °C (petroleum ether/dichloromethane); <sup>1</sup>H NMR (400 MHz, CDCl<sub>3</sub>)  $\delta$  = 7.40-7.22 (m, 5 H, Ar-H), 7.19 (t,  $J$  = 7.8 Hz, 1 H, =CH), 5.78 (s, 1 H, one proton of =CH<sub>2</sub>), 5.11 (s, 1 H, one proton of =CH<sub>2</sub>), 2.22 (q,  $J$  = 7.5 Hz, 2 H), 1.48-1.36 (m, 2 H, CH<sub>2</sub>), 1.36-1.22 (m, 2 H, CH<sub>2</sub>), 0.85 (t,  $J$  = 7.2 Hz, 3 H, CH<sub>3</sub>); <sup>13</sup>C NMR (100

MHz, CDCl<sub>3</sub>)  $\delta$  = 172.3, 148.9, 142.1, 139.0, 132.9, 128.4, 127.8, 125.7, 116.5, 30.8, 29.5, 22.4, 13.8; **IR** (neat):  $\nu$  = 2954, 2926, 2854, 2651, 2525, 1679, 1621, 1493, 1418, 1274 cm<sup>-1</sup>; **MS** (70 eV, EI)  $m/z$  (%): 231 (M<sup>+</sup>+1, 4.17), 230 (M<sup>+</sup>, 25.77), 143 (100); **Anal.** Calcd for C<sub>15</sub>H<sub>18</sub>O<sub>2</sub>: C 78.23, H 7.88; Found: C 78.26, H 8.11.

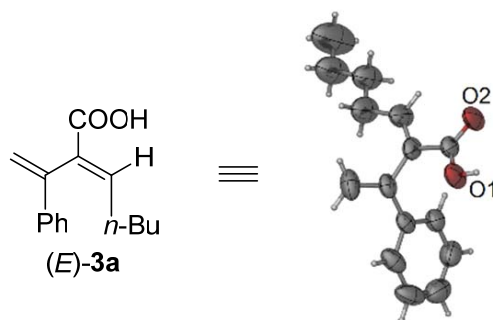

**Figure S1**

**(E)-3a**: C<sub>15</sub>H<sub>18</sub>O<sub>2</sub>, MW = 230.29, monoclinic, space group *I2/a*, final *R* indexes [*I* > 2 $\sigma$ (*I*)], *R*<sub>1</sub> = 0.0719, *wR*<sub>2</sub> = 0.2203; *R* indexes (all data), *R*<sub>1</sub> = 0.0759, *wR*<sub>2</sub> = 0.2259, *a* = 8.7690(2) Å, *b* = 17.0752(4) Å, *c* = 18.1342(3) Å,  $\alpha$  = 90°,  $\beta$  = 89.897(2)°,  $\gamma$  = 90°, *V* = 2715.27(10) Å<sup>3</sup>, *T* = 293(2) K, *Z* = 8, reflections collected/unique 29293/2375 [*R*<sub>int</sub> = 0.0773], no. of observations [*I* > 2 $\sigma$ (*I*)] 2120, parameters: 156. Supplementary crystallographic data have been deposited at the Cambridge Crystallographic Data Centre via [www.ccdc.cam.ac.uk/data\\_request/cif](http://www.ccdc.cam.ac.uk/data_request/cif). **CCDC-1582245**.

**(2) Preparation of (E)-7-chloro-2-(1-phenylvinyl)hept-2-enoic acid [(E)-3b] (Yy-2-086)**

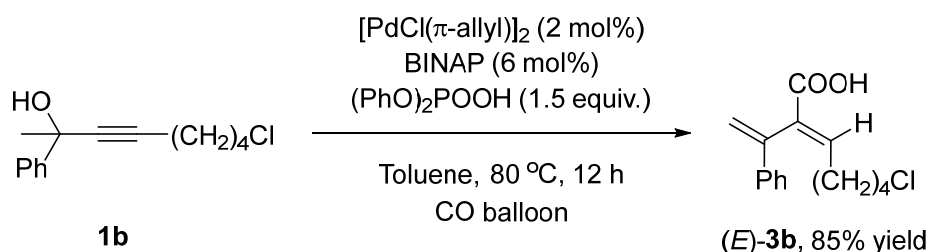

Following **Typical Procedure II**, the reaction of [PdCl( $\pi$ -allyl)]<sub>2</sub> (7.5 mg, 0.02 mmol), BINAP (39.3 mg, 0.06 mmol), (PhO)<sub>2</sub>POOH (386.2 mg, 1.5 mmol), and **1b** (236.7 mg, 1 mmol)/toluene (5 mL) afforded **(E)-3b** (224.9 mg, 85%) [using Biotage



Isorela One purification system on flash silica gel column (Santai Tech. Inc., 12 g), eluent: petroleum ether/ethyl acetate = 2% (2 CV), 2%-17% (14 CV), 17% (6 CV)] as a yellow oil:  $^1\text{H NMR}$  (400 MHz,  $\text{DMSO-}d_6$ )  $\delta$  = 12.3 (brs, 1 H, COOH), 7.45-7.24 (m, 5 H, Ar-H), 6.96 (t,  $J$  = 7.6 Hz, 1 H, =CH), 5.83 (s, 1 H, one proton of =CH<sub>2</sub>), 5.06 (s, 1 H, one proton of =CH<sub>2</sub>), 3.58 (t,  $J$  = 6.4 Hz, 2 H, CH<sub>2</sub>Cl), 2.17 (q,  $J$  = 7.3 Hz, 2 H, CH<sub>2</sub>), 1.78-1.61 (m, 2 H, CH<sub>2</sub>), 1.58-1.46 (m, 2 H, CH<sub>2</sub>);  $^{13}\text{C NMR}$  (100 MHz,  $\text{CDCl}_3$ )  $\delta$  = 171.9, 147.6, 141.9, 138.8, 133.5, 128.5, 127.9, 125.7, 116.7, 44.5, 32.1, 28.9, 25.9; **IR** (neat):  $\nu$  = 2952, 2934, 2861, 2640, 2518, 1679, 1618, 1493, 1411, 1267  $\text{cm}^{-1}$ ; **MS** (70 eV, EI)  $m/z$  (%): 267 [ $\text{M}^{+}(^{37}\text{Cl})+1$ , 1.43], 266 [ $\text{M}^{+}(^{37}\text{Cl})$ , 9.00], 265 [ $\text{M}^{+}(^{35}\text{Cl})+1$ , 5.11], 264 [ $\text{M}^{+}(^{35}\text{Cl})$ , 26.17], 143 (100); **HRMS** Calcd for  $\text{C}_{15}\text{H}_{17}\text{O}_2^{35}\text{Cl}$  ( $\text{M}^{+}$ ): 264.0917; Found: 264.0921.

**(3) Preparation of (*E*)-5-phenyl-2-(1-phenylvinyl)pent-2-enoic acid [(*E*)-3c] (Yy-2-075)**

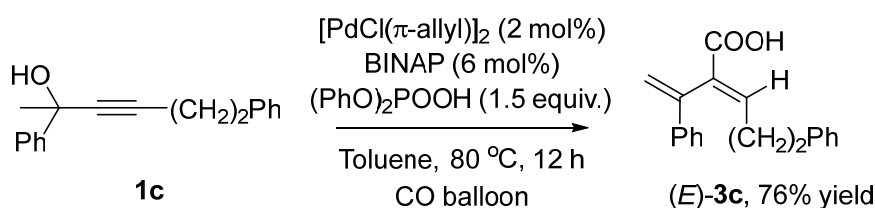

Following **Typical Procedure II**, the reaction of  $[\text{PdCl}(\pi\text{-allyl})]_2$  (7.5 mg, 0.02 mmol), BINAP (39.3 mg, 0.06 mmol),  $(\text{PhO})_2\text{POOH}$  (386.9 mg, 1.5 mmol), and **1c** (250.3 mg, 1 mmol)/toluene (5 mL) afforded (*E*)-**3c** (210.8 mg, 76%) (eluent: petroleum ether/ethyl acetate = 20/1) as a yellow solid: m.p. 98.1-98.5 °C (petroleum ether/dichloromethane);  $^1\text{H NMR}$  (400 MHz,  $\text{CDCl}_3$ )  $\delta$  = 11.7 (brs, 1 H, COOH), 7.31-7.13 (m, 9 H, 8 protons of Ar-H and one proton of =CH), 7.12-7.04 (m, 2 H, Ar-H), 5.72 (s, 1 H, one proton of =CH<sub>2</sub>), 4.95 (s, 1 H, one proton of =CH<sub>2</sub>), 2.74 (t,  $J$  = 7.4 Hz, 2 H, CH<sub>2</sub>), 2.54 (q,  $J$  = 7.5 Hz, 2 H, CH<sub>2</sub>);  $^{13}\text{C NMR}$  (100 MHz,  $\text{CDCl}_3$ )  $\delta$  = 171.9, 147.3, 142.0, 140.7, 138.9, 133.6, 128.5, 128.4, 127.8, 126.2, 125.7, 116.7, 34.9, 31.7; **IR** (neat):  $\nu$  = 3025, 2929, 2862, 2639, 2534, 1677, 1635, 1616, 1493, 1424, 1277  $\text{cm}^{-1}$ ; **MS** (70 eV, EI)  $m/z$  (%): 279 ( $\text{M}^{+}+1$ , 1.36), 278 ( $\text{M}^{+}$ , 6.03), 91 (100); **Anal.** Calcd for  $\text{C}_{19}\text{H}_{18}\text{O}_2$ : C 81.99, H 6.52; Found: C 81.68, H 6.51.

**(4) Preparation of (*E*)-4-methyl-2-(1-phenylvinyl)pent-2-enoic acid [(*E*)-3d]  
(cfsy-1-200, Yy-2-109)**

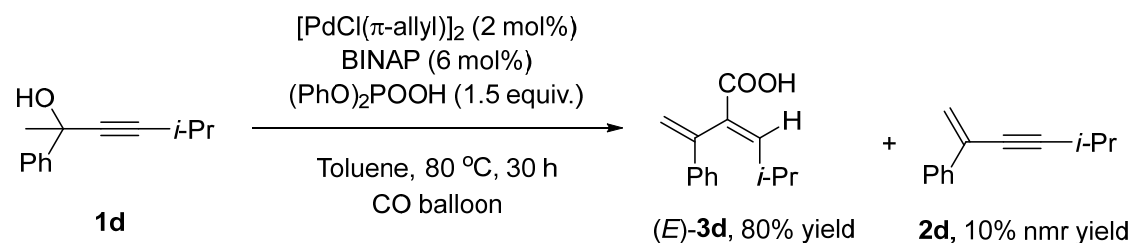

Following **Typical Procedure II**, the reaction of  $[\text{PdCl}(\pi\text{-allyl})]_2$  (7.7 mg, 0.02 mmol), BINAP (39.3 mg, 0.06 mmol),  $(\text{PhO})_2\text{POOH}$  (379.8 mg, 1.5 mmol), and **1d** (188.5 mg, 1 mmol)/toluene (5 mL) afforded (*E*)-**3d** (174.0 mg, 80%) (10% of **2d** was also detected through  $^1\text{H}$  NMR analysis of the crude product using dibromomethane as the internal standard) [eluent: petroleum ether/ethyl acetate = 400/20 to 800/160 to 100/25 (v/v)] as a yellow solid: m.p. 100.3-100.6 °C (petroleum ether/dichloromethane);  $^1\text{H}$  NMR (400 MHz,  $\text{CDCl}_3$ )  $\delta$  = 7.40-7.20 (m, 5 H, Ar-H), 6.96 (d,  $J$  = 10.4 Hz, 1 H, =CH), 5.77 (s, 1 H, one proton of =CH<sub>2</sub>), 5.11 (s, 1 H, one proton of =CH<sub>2</sub>), 2.72-2.58 (m, 1 H, CH), 1.01 (d,  $J$  = 6.4 Hz, 6 H, CH<sub>3</sub> x 2);  $^{13}\text{C}$  NMR (100 MHz,  $\text{CDCl}_3$ )  $\delta$  = 172.5, 154.6, 142.2, 138.9, 130.6, 128.4, 127.8, 125.7, 116.2, 29.0, 22.1; IR (neat):  $\nu$  = 2962, 2869, 2644, 2514, 1682, 1633, 1612, 1493, 1412, 1267  $\text{cm}^{-1}$ ; MS (70 eV, EI)  $m/z$  (%): 217 ( $\text{M}^+ + 1$ , 4.18), 216 ( $\text{M}^+$ , 26.88), 157 (100); **Anal.** Calcd for  $\text{C}_{14}\text{H}_{16}\text{O}_2$ : C 77.75, H 7.46; Found: C 77.62, H 7.40.

**(5) Preparation of 2-(1-phenylvinyl)prop-2-enoic acid (3e) (Yy-2-182)**

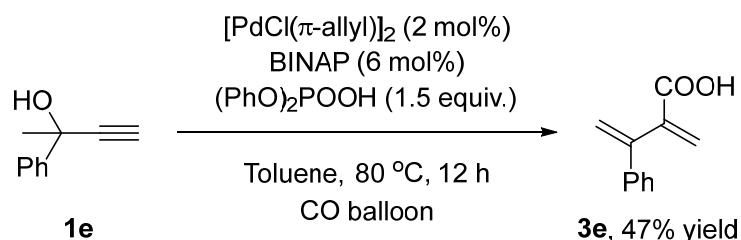

Following **Typical Procedure II**, the reaction of  $[\text{PdCl}(\pi\text{-allyl})]_2$  (7.5 mg, 0.02 mmol), BINAP (39.4 mg, 0.06 mmol),  $(\text{PhO})_2\text{POOH}$  (379.1 mg, 1.5 mmol), and **1e** (146.2 mg, 1 mmol)/toluene (5 mL) afforded **3e**<sup>2</sup> (81.3 mg, 47%) via double chromatography on silica gel (first round: using Biotage Isorela One purification

system on flash silica gel column (Santai Tech. Inc., 12 g), eluent: petroleum ether/ethyl acetate = 2% (2 CV), 2%-17% (14 CV), 17% (6 CV); Then all the product was collected for the second round chromatography on silica gel, eluent: petroleum ether/ethyl acetate = 200/10 to 250/50 to 200/50 to 200/100) (v/v) as a yellow solid, m.p. 101.6-102.3 °C (petroleum ether/dichloromethane) (reported:<sup>2</sup> 106-107 °C): <sup>1</sup>H NMR (400 MHz, CDCl<sub>3</sub>) δ = 10.85 (brs, 1 H, COOH), 7.40-7.18 (m, 5 H, Ar-H), 6.45 (s, 1 H, one proton of =CH<sub>2</sub>), 5.89 (s, 1 H, one proton of =CH<sub>2</sub>), 5.53 (s, 1 H, one proton of =CH<sub>2</sub>), 5.37 (s, 1 H, one proton of =CH<sub>2</sub>); <sup>13</sup>C NMR (100 MHz, CDCl<sub>3</sub>) δ = 172.0, 145.3, 141.2, 139.2, 130.4, 128.3, 127.9, 126.4, 116.8; IR (neat): ν = 3023, 2921, 2854, 2637, 2563, 1679, 1612, 1490, 1426, 1260, 1154 cm<sup>-1</sup>; MS (70 eV, EI) m/z (%): 175 (M<sup>+</sup>+1, 4.17), 174 (M<sup>+</sup>, 33.00), 129 (100).

**(6) Preparation of (*E*)-3-phenyl-2-(1-phenylvinyl)prop-2-enoic acid [(*E*)-3f] (Yy-2-029)**

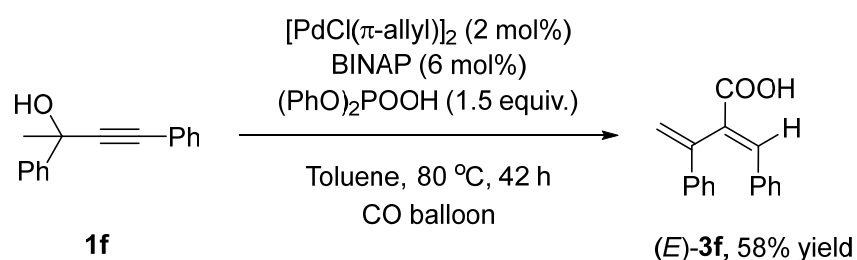

Following **Typical Procedure II**, the reaction of [PdCl(π-allyl)]<sub>2</sub> (7.5 mg, 0.02 mmol), BINAP (39.3 mg, 0.06 mmol), (PhO)<sub>2</sub>POOH (386.9 mg, 1.5 mmol), and **1f** (222.1 mg, 1 mmol)/toluene (5 mL) afforded (*E*)-**3f** (145.2 mg, 58%) (eluent: petroleum ether/ethyl acetate = 10/1) as a yellow solid: m.p. 141.3-141.8 °C (petroleum ether/dichloromethane); <sup>1</sup>H NMR (400 MHz, CDCl<sub>3</sub>) δ = 7.96 (s, 1 H, =CH), 7.64-7.54 (m, 2 H, Ar-H), 7.54-7.45 (m, 2 H, Ar-H), 7.37-7.21 (m, 6 H, Ar-H), 5.86 (s, 1 H, one proton of =CH<sub>2</sub>), 5.28 (s, 1 H, one proton of =CH<sub>2</sub>); <sup>13</sup>C NMR (100 MHz, (CD<sub>3</sub>)<sub>2</sub>CO) δ = 168.5, 143.6, 141.4, 138.4, 135.4, 134.0, 133.5, 131.0, 130.2, 129.4, 129.3, 128.3, 117.3; IR (neat): ν = 3051, 2922, 2852, 2622, 2509, 1676, 1602, 1494, 1420, 1270, 1204 cm<sup>-1</sup>; MS (70 eV, EI) m/z (%): 251 (M<sup>+</sup>+1, 3.57), 250 (M<sup>+</sup>, 19.39), 205 (100); **Anal.** Calcd for C<sub>17</sub>H<sub>14</sub>O<sub>2</sub>: C 81.58, H 5.64; Found: C 81.42, H

5.91.

**(7) Preparation of (*E*)-3-(3-methylphenyl)-2-(1-phenylvinyl)prop-2-enoic acid [(*E*)-3g] (Yy-2-085)**

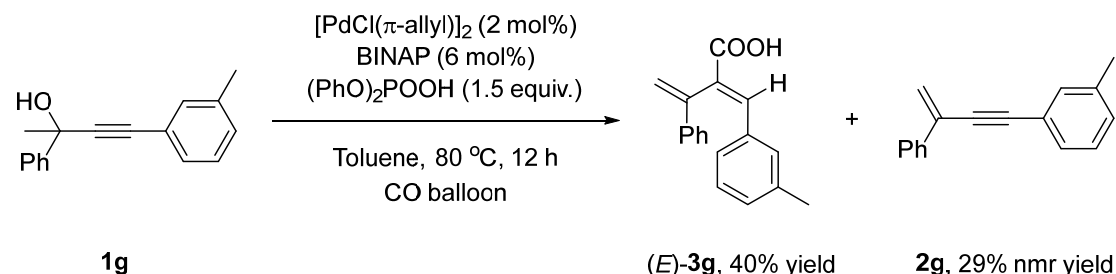

Following **Typical Procedure II**, the reaction of [PdCl( $\pi$ -allyl)]<sub>2</sub> (7.5 mg, 0.02 mmol), BINAP (39.3 mg, 0.06 mmol), (PhO)<sub>2</sub>POOH (386.9 mg, 1.5 mmol), and **1g** (236.4 mg, 1 mmol)/toluene (5 mL) afforded (*E*)-**3g** (106.4 mg, 40%) (29% **2g** was also detected through <sup>1</sup>H NMR analysis of the crude product using dibromomethane as the internal standard) [using Biotage Isorela One purification system on flash silica gel column (Santai Tech. Inc., 12 g), eluent: petroleum ether/ethyl acetate = 2% (2 CV), 2%-17% (14 CV), 17% (6 CV)] as a yellow solid: m.p. 118.3-118.8 °C (petroleum ether/dichloromethane); <sup>1</sup>H NMR (400 MHz, CDCl<sub>3</sub>)  $\delta$  = 7.93 (s, 1 H, =CH), 7.53-7.45 (m, 2 H, Ar-H), 7.42 (d, *J* = 7.2 Hz, 1 H, Ar-H), 7.36 (s, 1 H, Ar-H), 7.35-7.26 (m, 3 H, Ar-H), 7.16-7.06 (m, 2 H, Ar-H), 5.85 (s, 1 H, one proton of =CH<sub>2</sub>), 5.27 (s, 1 H, one proton of =CH<sub>2</sub>), 2.26 (s, 3 H, CH<sub>3</sub>); <sup>13</sup>C NMR (100 MHz, CDCl<sub>3</sub>)  $\delta$  = 172.9, 143.3, 142.9, 138.2, 138.0, 134.0, 131.7, 131.1, 130.6, 128.6, 128.3, 128.1, 127.4, 125.8, 116.8, 21.3; IR (neat):  $\nu$  = 3049, 2919, 2852, 2629, 2514, 1678, 1603, 1492, 1421, 1279, 1242 cm<sup>-1</sup>; MS (70 eV, EI) *m/z* (%): 265 (M<sup>+</sup>+1, 4.94), 264 (M<sup>+</sup>, 24.31), 219 (100); **Anal.** Calcd for C<sub>18</sub>H<sub>16</sub>O<sub>2</sub>: C 81.79, H 6.10; Found: C 81.68, H 6.18.

**(8) Preparation of (*E*)-3-(4-chlorophenyl)-2-(1-phenylvinyl)prop-2-enoic acid [(*E*)-3h] (Yy-2-102)**

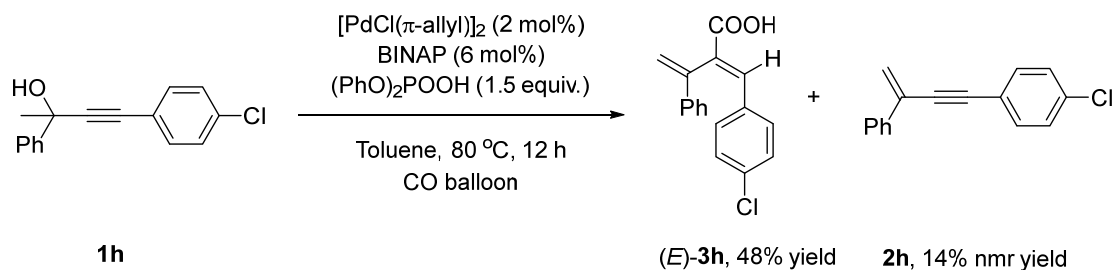

Following **Typical Procedure II**, the reaction of  $[\text{PdCl}(\pi\text{-allyl})]_2$  (7.5 mg, 0.02 mmol), BINAP (39.3 mg, 0.06 mmol),  $(\text{PhO})_2\text{POOH}$  (379.3 mg, 1.5 mmol), and **1h** (256.1 mg, 1 mmol)/toluene (5 mL) afforded (*E*)-**3h** (138.0 mg, 48%) [eluent: pure dichloromethane (400 mL) to dichloromethane/MeOH = 150/1] as a yellow solid: m.p. 145.3-146.0 °C (petroleum ether/dichloromethane);  $^1\text{H NMR}$  (400 MHz,  $\text{DMSO-}d_6$ )  $\delta$  = 12.67 (s, 1 H, COOH), 7.79 (s, 1 H, =CH), 7.58 (d,  $J$  = 8.8 Hz, 2 H, Ar-H), 7.47 (d,  $J$  = 7.2 Hz, 2 H, Ar-H), 7.41-7.28 (m, 5 H, Ar-H), 5.91 (s, 1 H, one proton of =CH<sub>2</sub>), 5.17 (s, 1 H, one proton of =CH<sub>2</sub>);  $^{13}\text{C NMR}$  (100 MHz,  $\text{CDCl}_3$ )  $\delta$  = 172.8, 142.5, 141.8, 137.7, 135.8, 132.4, 131.80, 131.77, 128.75, 128.74, 128.3, 125.7, 116.9; **IR** (neat):  $\nu$  = 2795, 2622, 2510, 1676, 1601, 1589, 1490, 1418, 1281  $\text{cm}^{-1}$ ; **MS** (70 eV, EI)  $m/z$  (%): 287 [ $\text{M}^+(\text{^{37}Cl})+1$ , 1.55], 286 [ $\text{M}^+(\text{^{37}Cl})$ , 8.69], 285 [ $\text{M}^+(\text{^{35}Cl})+1$ , 5.43], 284 [ $\text{M}^+(\text{^{35}Cl})$ , 27.39], 203 (100); **Anal.** Calcd for  $\text{C}_{17}\text{H}_{13}\text{ClO}_2$ : C 71.71, H 4.60; Found: C 71.60, H 4.80.

**(9) Preparation of (*E*)-3-phenyl-2-(1-(4-chlorophenyl)vinyl)prop-2-enoic acid [(*E*)-3i] (Yy-2-033)**

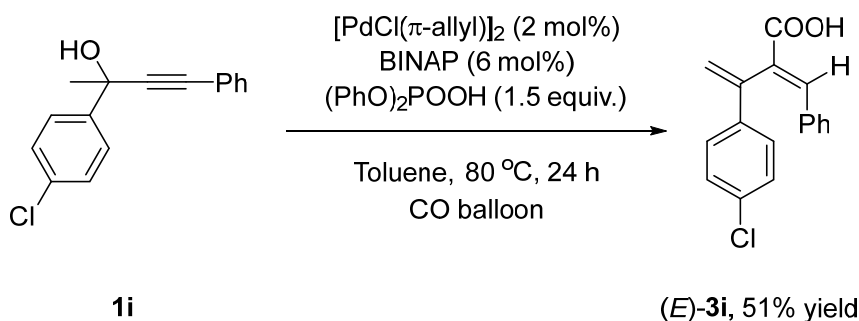

Following **Typical Procedure II**, the reaction of  $[\text{PdCl}(\pi\text{-allyl})]_2$  (7.5 mg, 0.02 mmol), BINAP (39.3 mg, 0.06 mmol),  $(\text{PhO})_2\text{POOH}$  (386.6 mg, 1.5 mmol), and **1i** (256.1 mg, 1 mmol)/toluene (5 mL) afforded impure (*E*)-**3i** (eluent: petroleum

ether/ethyl acetate = 10/1) as yellow solid, which was recrystallized from petroleum ether/dichloromethane to give (*E*)-**3i** as a white solid (146.1 mg, 51%): m.p. 139.2-140.5 °C (petroleum ether/dichloromethane); <sup>1</sup>H NMR (400 MHz, CDCl<sub>3</sub>) δ = 7.96 (s, 1 H, =CH), 7.62-7.50 (m, 2 H, Ar-H), 7.49-7.38 (m, 2 H, Ar-H), 7.36-7.22 (m, 5 H, Ar-H), 5.85 (s, 1 H, one proton of =CH<sub>2</sub>), 5.30 (s, 1 H, one proton of =CH<sub>2</sub>); <sup>13</sup>C NMR (100 MHz, DMSO-*d*<sub>6</sub>) δ = 167.9, 142.0, 140.0, 137.0, 134.2, 132.62, 132.56, 129.98, 129.50, 128.7, 128.6, 127.4, 116.8; IR (neat): ν = 3029, 2805, 2635, 2513, 1670, 1600, 1488, 1416, 1270, 1206 cm<sup>-1</sup>; MS (70 eV, EI) *m/z* (%): 287 [M<sup>+</sup>(<sup>37</sup>Cl)+1, 1.65], 286 [M<sup>+</sup>(<sup>37</sup>Cl), 9.22], 285 [M<sup>+</sup>(<sup>35</sup>Cl)+1, 5.73], 284 [M<sup>+</sup>(<sup>35</sup>Cl), 27.61], 204 (100); HRMS Calcd for C<sub>17</sub>H<sub>13</sub><sup>35</sup>ClO<sub>2</sub>: 284.0604; Found: 284.0601.

**(10) Preparation of (*E*)-2-(1-(4-chlorophenyl)vinyl)hept-2-enoic acid [(*E*)-**3j**] (Yy-2-103)**

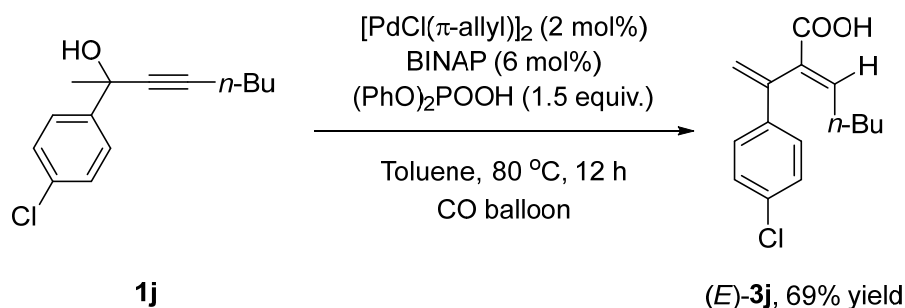

Following **Typical Procedure II**, the reaction of [PdCl(π-allyl)]<sub>2</sub> (7.5 mg, 0.02 mmol), BINAP (39.4 mg, 0.06 mmol), (PhO)<sub>2</sub>POOH (379.2 mg, 1.5 mmol), **1h** (236.2 mg, 1 mmol)/toluene (5 mL) afforded (*E*)-**3j** (182.0 mg, 69%) [using Biotage Isorela One purification system on flash silica gel column (Santai Tech. Inc., 12 g), eluent: petroleum ether/ethyl acetate = 2% (2 CV), 2%-17% (14 CV), 17% (6 CV)] as a white solid: m.p. 68.8-69.8 °C (petroleum ether/dichloromethane); <sup>1</sup>H NMR (400 MHz, CDCl<sub>3</sub>) δ = 7.32-7.23 (m, 4 H, Ar-H), 7.20 (t, *J* = 7.6 Hz, 1 H, =CH), 5.77 (s, 1 H, one proton of =CH<sub>2</sub>), 5.13 (s, 1 H, one proton of =CH<sub>2</sub>), 2.21 (q, *J* = 7.6 Hz, 2 H, CH<sub>2</sub>), 1.48-1.24 (m, 4 H, CH<sub>2</sub> x 2), 0.86 (t, *J* = 7.2 Hz, 3 H, CH<sub>3</sub>); <sup>13</sup>C NMR (100 MHz, CDCl<sub>3</sub>) δ = 172.0, 149.3, 141.1, 137.6, 133.7, 132.5, 128.6, 127.1, 117.1, 30.8, 29.5, 22.4, 13.8; IR (neat): ν = 2966, 2931, 2872, 2638, 2538, 1673, 1620, 1488, 1432,

1287  $\text{cm}^{-1}$ ; **MS** (70 eV, EI)  $m/z$  (%): 267 [ $\text{M}^+(\text{}^{37}\text{Cl})+1$ , 2.82], 266 [ $\text{M}^+(\text{}^{37}\text{Cl})$ , 13.47], 265 [ $\text{M}^+(\text{}^{35}\text{Cl})+1$ , 6.86], 264 [ $\text{M}^+(\text{}^{35}\text{Cl})$ , 40.59], 177 (100); **Anal.** Calcd for  $\text{C}_{15}\text{H}_{17}\text{ClO}_2$ : C 68.05, H 6.47; Found: C 68.04, H 6.41.

**(11) Preparation of (*E*)-2-(1-(*p*-tolyl)vinyl)hept-2-enoic acid [(*E*)-3k] (Yy-2-105)**

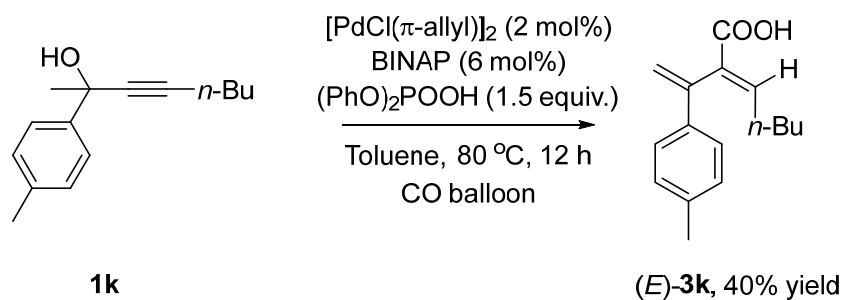

Following **Typical Procedure II**, the reaction of  $[\text{PdCl}(\pi\text{-allyl})]_2$  (7.5 mg, 0.02 mmol), BINAP (39.3 mg, 0.06 mmol),  $(\text{PhO})_2\text{POOH}$  (379.1 mg, 1.5 mmol), and **1k** (216.9 mg, 1 mmol)/toluene (5 mL) afforded (*E*)-**3k** (105.2 mg, 94% purity, 40%) [using Biotage Isorela One purification system on flash silica gel column (Santai Tech. Inc., 12 g), eluent: petroleum ether/ethyl acetate = 2% (2 CV), 2%-17% (14 CV), 17% (6 CV)] as a yellow oil:  **$^1\text{H NMR}$**  (400 MHz,  $\text{DMSO-}d_6$ )  $\delta$  = 12.21 (s, 1 H, COOH), 7.23 (d,  $J$  = 7.6 Hz, 2 H, Ar-H), 7.13 (d,  $J$  = 7.6 Hz, 2 H, Ar-H), 6.93 (t,  $J$  = 7.8 Hz, 1 H, =CH), 5.76 (s, 1 H, one proton of =CH<sub>2</sub>), 4.98 (s, 1 H, one proton of =CH<sub>2</sub>), 2.28 (s, 3 H, CH<sub>3</sub>), 2.11 (q,  $J$  = 7.5 Hz, 2 H, CH<sub>2</sub>), 1.43-1.15 (m, 4 H, CH<sub>2</sub> x 2), 0.81 (t,  $J$  = 7.2 Hz, 3 H, CH<sub>3</sub>);  **$^{13}\text{C NMR}$**  (100 MHz,  $\text{CDCl}_3$ )  $\delta$  = 172.0, 148.8, 141.8, 137.7, 136.1, 132.9, 129.1, 125.6, 115.6, 30.9, 29.5, 22.5, 21.1, 13.8; **IR** (neat):  $\nu$  = 2956, 2925, 2859, 2644, 2522, 1683, 1632, 1512, 1412, 1274  $\text{cm}^{-1}$ ; **MS** (70 eV, EI)  $m/z$  (%): 245 ( $\text{M}^++1$ , 5.60), 244 ( $\text{M}^+$ , 30.89), 157 (100); **HRMS** Calcd for  $\text{C}_{16}\text{H}_{20}\text{O}_2$  ( $\text{M}^+$ ): 244.1463; Found: 244.1467.

**(12) Preparation of (*E*)-2-(1-(4-bromophenyl)vinyl)non-2-enoic acid [(*E*)-3l] (Yy-2-022)**

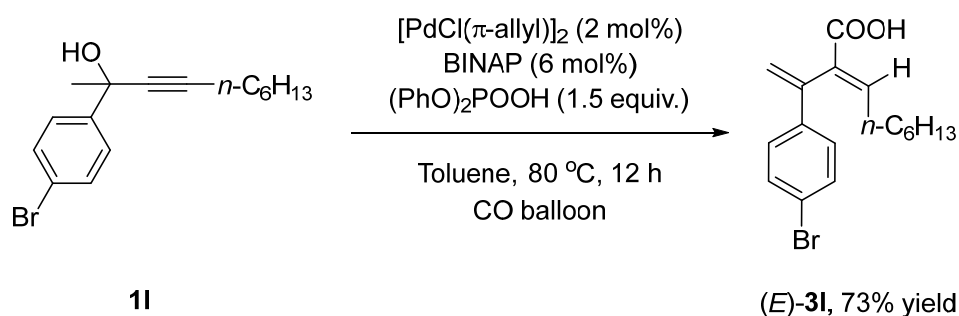

Following **Typical Procedure II**, the reaction of  $[\text{PdCl}(\pi\text{-allyl})]_2$  (7.5 mg, 0.02 mmol), BINAP (39.3 mg, 0.06 mmol),  $(\text{PhO})_2\text{POOH}$  (386.9 mg, 1.5 mmol), and **1I** (309.2 mg, 1 mmol)/toluene (5 mL) afforded **(E)-3I** (247.6 mg, 73%) (eluent: petroleum ether/ethyl acetate = 20/1) as a yellow solid: m.p. 83.0-83.4 °C (dichloromethane);  $^1\text{H NMR}$  (400 MHz,  $\text{DMSO}-d_6$ )  $\delta$  = 12.32 (s, 1 H, COOH), 7.52 (d,  $J$  = 8.0 Hz, 2 H, Ar-H), 7.28 (d,  $J$  = 8.4 Hz, 2 H, Ar-H), 6.96 (t,  $J$  = 7.6 Hz, 1 H, =CH), 5.85 (s, 1 H, =CH<sub>2</sub>), 5.09 (s, 1 H, =CH<sub>2</sub>), 2.11 (q,  $J$  = 7.6 Hz, 2 H, CH<sub>2</sub>), 1.44-1.30 (m, 2 H, CH<sub>2</sub>), 1.28-1.10 (m, 6 H, CH<sub>2</sub> x 3), 0.81 (t,  $J$  = 7.0 Hz, 3 H, CH<sub>3</sub>);  $^{13}\text{C NMR}$  (100 MHz,  $\text{CDCl}_3$ ):  $\delta$  = 172.0, 149.4, 141.1, 138.0, 132.4, 131.5, 127.4, 121.9, 117.2, 31.5, 29.8, 29.0, 28.6, 22.5, 14.0; **IR** (neat):  $\nu$  = 2923, 2850, 2634, 2528, 1679, 1603, 1482, 1419, 1283, 1204  $\text{cm}^{-1}$ ; **MS** (70 eV, EI)  $m/z$  (%): 339 [ $\text{M}^+(\text{}^{81}\text{Br})+1$ , 3.04], 338 [ $\text{M}^+(\text{}^{81}\text{Br})$ , 16.30], 337 [ $\text{M}^+(\text{}^{79}\text{Br})+1$ , 3.75], 336 [ $\text{M}^+(\text{}^{79}\text{Br})$ , 16.49], 142 (100); **Anal.** Calcd for  $\text{C}_{17}\text{H}_{21}\text{BrO}_2$ : C 60.54, H 6.28; Found: C 60.36, H 6.36.

### (13) Preparation of *(E)*-2-(1-(*m*-tolyl)vinyl)non-2-enoic acid [*(E)*-3m] (Yy-2-037)

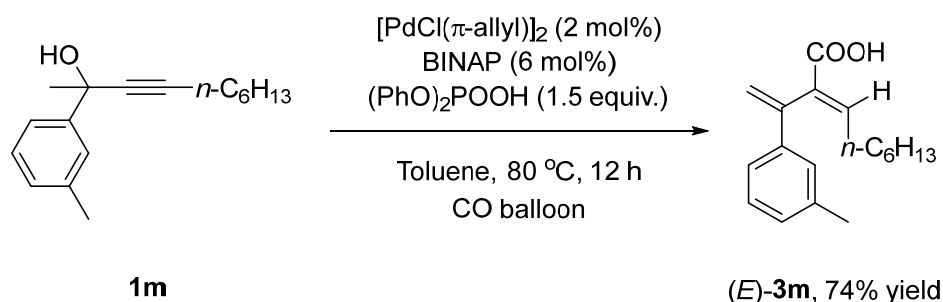

Following **Typical Procedure II**, the reaction of  $[\text{PdCl}(\pi\text{-allyl})]_2$  (7.5 mg, 0.02 mmol), BINAP (39.3 mg, 0.06 mmol),  $(\text{PhO})_2\text{POOH}$  (386.9 mg, 1.5 mmol), and **1m** (244.6 mg, 1 mmol)/toluene (5 mL) afforded **(E)-3m** (202.3 mg, 74%) via double chromatography on silica gel (first round eluent: petroleum ether/ethyl acetate = 20/1;



second round eluent: dichloromethane/MeOH = 150/1) as a yellow oil: **<sup>1</sup>H NMR** (400 MHz, DMSO-*d*<sub>6</sub>)  $\delta$  = 12.23 (s, 1 H, COOH), 7.26-7.06 (m, 4 H, Ar-H), 6.94 (t, *J* = 7.6 Hz, 1 H, =CH), 5.79 (s, 1 H, one proton of =CH<sub>2</sub>), 5.02 (s, 1 H, one proton of =CH<sub>2</sub>), 2.29 (s, 3 H, CH<sub>3</sub>), 2.13 (q, *J* = 7.3 Hz, 2 H, CH<sub>2</sub>), 1.46-1.32 (m, 2 H, CH<sub>2</sub>), 1.30-1.11 (m, 6 H, CH<sub>2</sub> x 3), 0.81 (t, *J* = 6.6 Hz, 3 H, CH<sub>3</sub>); **<sup>13</sup>C NMR** (100 MHz, CDCl<sub>3</sub>)  $\delta$  = 172.0, 148.9, 142.1, 138.9, 138.0, 132.9, 128.7, 128.3, 126.4, 122.9, 116.4, 31.5, 29.8, 29.1, 28.7, 22.5, 21.5, 14.0; **IR** (neat):  $\nu$  = 2955, 2924, 2855, 2644, 2523, 1683, 1633, 1456, 1414, 1277 cm<sup>-1</sup>; **MS** (70 eV, EI) *m/z* (%): 273 (M<sup>+</sup>+1, 4.33), 272 (M<sup>+</sup>, 20.18), 157 (100); **HRMS** Calcd for C<sub>18</sub>H<sub>24</sub>O<sub>2</sub> (M<sup>+</sup>): 272.1776; Found: 272.1778.

**(14) Preparation of (*E*)-2-(1-(3-methoxyphenyl)vinyl)non-2-enoic acid [(*E*)-**3n**] (**Yy-2-080**)**

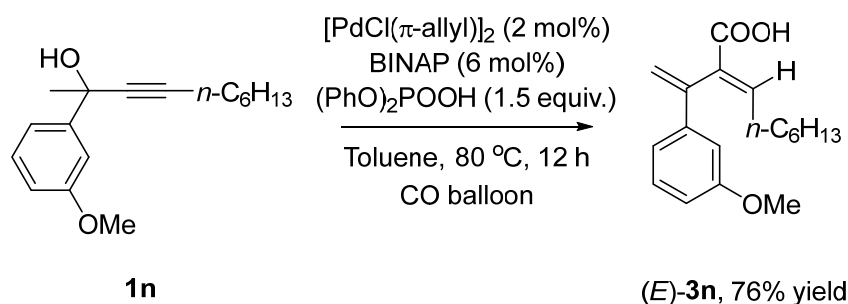

Following **Typical Procedure II**, the reaction of [PdCl( $\pi$ -allyl)]<sub>2</sub> (7.5 mg, 0.02 mmol), BINAP (39.3 mg, 0.06 mmol), (PhO)<sub>2</sub>POOH (387.0 mg, 1.5 mmol), and **1n** (260.4 mg, 1 mmol)/toluene (5 mL) afforded (*E*)-**3n** (219.2 mg, 76%) [using Biotage Isorela One purification system on flash silica gel column (Santai Tech. Inc., 12 g), eluent: petroleum ether/ethyl acetate = 2% (2 CV), 2%-17% (14 CV), 17% (6 CV)] as a yellow oil: **<sup>1</sup>H NMR** (400 MHz, DMSO-*d*<sub>6</sub>)  $\delta$  = 12.25 (s, 1 H, COOH), 7.25 (t, *J* = 8.4 Hz, 1 H, =CH), 7.00-6.81 (m, 4 H, Ar-H), 5.84 (s, 1 H, one proton of =CH<sub>2</sub>), 5.05 (s, 1 H, one proton of =CH<sub>2</sub>), 3.75 (s, 3 H, CH<sub>3</sub>), 2.13 (q, *J* = 7.5 Hz, 2 H, CH<sub>2</sub>), 1.45-1.30 (m, 2 H, CH<sub>2</sub>), 1.30-1.10 (m, 6 H, CH<sub>2</sub> x 3), 0.81 (t, *J* = 6.8 Hz, 3 H, CH<sub>3</sub>); **<sup>13</sup>C NMR** (100 MHz, CDCl<sub>3</sub>)  $\delta$  = 172.1, 159.7, 148.9, 142.0, 140.5, 132.8, 129.4, 118.4, 116.8, 113.2, 111.5, 55.2, 31.5, 29.8, 29.1, 28.7, 22.5, 14.0; **IR** (neat):  $\nu$  = 2954, 2925, 2855, 2649, 2522, 1683, 1576, 1487, 1463, 1417, 1277, 1224 cm<sup>-1</sup>; **MS** (70 eV,

EI  $m/z$  (%): 289 ( $M^{+1}$ , 10.12), 288 ( $M^+$ , 46.37), 173 (100); **HRMS** Calcd for  $C_{18}H_{24}O_3$  ( $M^+$ ): 288.1725; Found: 288.1724.

**(15) Preparation of (*E*)-2-(1-(2-naphthyl)vinyl)non-2-enoic acid [(*E*)-3o] (cfsy-2-001, Yy-2-188)**

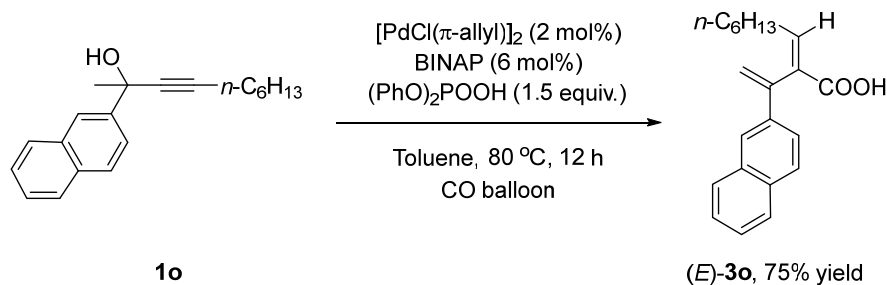

Following **Typical Procedure II**, the reaction of  $[PdCl(\pi\text{-allyl})]_2$  (7.5 mg, 0.02 mmol), BINAP (39.6 mg, 0.06 mmol),  $(PhO)_2POOH$  (379.3 mg, 1.5 mmol), and **1o** (280.8 mg, 1 mmol)/toluene (5 mL) afforded (*E*)-**3o** (231.7 mg, 75%) (eluent: petroleum ether/ethyl acetate = 400/20 to 800/160) as a yellow oil:  **$^1H$  NMR** (400 MHz,  $CDCl_3$ )  $\delta$  = 10.74 (brs, 1 H, COOH), 7.83-7.70 (m, 3 H, Ar-H), 7.66 (s, 1 H, Ar-H), 7.62-7.55 (m, 1 H, Ar-H), 7.48-7.38 (m, 2 H, Ar-H), 7.24 (t,  $J$  = 7.6 Hz, 1 H, =CH), 5.92 (s, 1 H, one proton of =CH<sub>2</sub>), 5.19 (s, 1 H, one proton of =CH<sub>2</sub>), 2.22 (q,  $J$  = 7.5 Hz, 2 H, CH<sub>2</sub>), 1.49-1.36 (m, 2 H, CH<sub>2</sub>), 1.32-1.12 (m, 6 H, CH<sub>2</sub> x 3), 0.81 (t,  $J$  = 6.8 Hz, 3 H, CH<sub>3</sub>);  **$^{13}C$  NMR** (100 MHz,  $CDCl_3$ )  $\delta$  = 172.3, 149.2, 142.0, 136.2, 133.3, 133.0, 132.8, 128.3, 128.1, 127.5, 126.1, 125.9, 124.9, 123.7, 117.0, 31.5, 29.8, 29.1, 28.6, 22.5, 14.0; **IR** (neat):  $\nu$  = 3054, 2923, 2855, 2645, 2521, 1681, 1625, 1456, 1414, 1273  $cm^{-1}$ ; **MS** (70 eV, EI)  $m/z$  (%): 309 ( $M^{+1}$ , 11.08), 308 ( $M^+$ , 47.97), 179 (100); **HRMS** Calcd for  $C_{21}H_{24}O_2$ : 308.1776; Found: 308.1778.

**(16) Preparation of (*E*)-2-(1-(4-bromophenyl)vinyl)non-2-enoic acid [(*E*)-3l] in Gram scale (Yy-2-111)**

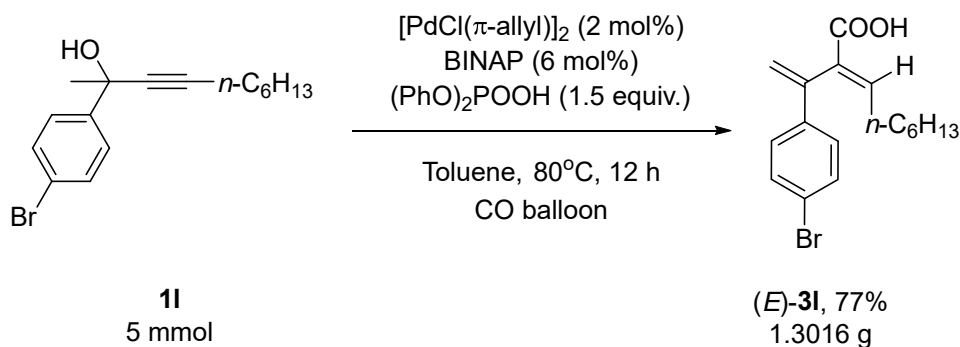

Following **Typical Procedure II**, the reaction of  $[\text{PdCl}(\pi\text{-allyl})]_2$  (37.3 mg, 0.10 mmol), BINAP (196.6 mg, 0.30 mmol),  $(\text{PhO})_2\text{POOH}$  (1.8954 g, 7.5 mmol), and **11** (1.5464 g, 5 mmol)/toluene (25 mL) afforded **(E)-31** (1.3016 g, 77%) via double chromatography on silica gel (first round eluent: dichloromethane/MeOH = 150/1; Then all the crude product was collected for the second round chromatography, eluent: dichloromethane/MeOH = 150/1) as a light yellow solid:  $^1\text{H NMR}$  (400 MHz,  $\text{DMSO}-d_6$ )  $\delta$  = 12.36 (s, 1 H, COOH), 7.53 (d,  $J$  = 8.8 Hz, 2 H, Ar-H), 7.29 (d,  $J$  = 8.8 Hz, 2 H, Ar-H), 6.98 (t,  $J$  = 7.8 Hz, 1 H, =CH), 5.87 (s, 1 H, =CH<sub>2</sub>), 5.10 (s, 1 H, =CH<sub>2</sub>), 2.12 (q,  $J$  = 7.3 Hz, 2 H, CH<sub>2</sub>), 1.50-1.30 (m, 2 H, CH<sub>2</sub>), 1.30-1.11 (m, 6 H, CH<sub>2</sub> x 3), 0.81 (t,  $J$  = 7.0 Hz, 3 H, CH<sub>3</sub>).

#### 4. Reaction monitoring using substrate **1a**<sup>a</sup> (Yy-2-194)

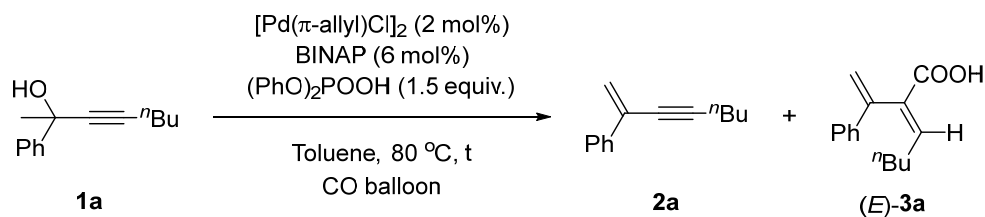

| t/h  | NMR yield of enyne <b>2a</b> <sup>b</sup> /% | NMR yield of product <b>3a</b> <sup>b</sup> /% |
|------|----------------------------------------------|------------------------------------------------|
| 0.17 | 83                                           | 8                                              |
| 0.33 | 78                                           | 25                                             |
| 0.5  | 69                                           | 35                                             |
| 1    | 51                                           | 48                                             |
| 2    | 30                                           | 57                                             |
| 3    | 24                                           | 75                                             |
| 4    | 16                                           | 76                                             |
| 6    | 8                                            | 86                                             |
| 8    | 2                                            | 92                                             |
| 10   | 0                                            | 94                                             |

<sup>a</sup> Following Typical Procedure II, the reaction of **1a** (201.9 mg, 1 mmol), [Pd(π-allyl)Cl]<sub>2</sub> (7.5 mg, 0.02 mmol), BINAP (39.3 mg, 0.06 mmol), and (PhO)<sub>2</sub>POOH (379.1 mg, 1.5 equiv.) in toluene (5 mL) was conducted at 80 °C under 1 atm. of CO. <sup>b</sup> Determined by taking 0.3 mL of the reaction solution followed by <sup>1</sup>H NMR analysis using 3.5 μL of dibromomethane as the internal standard.

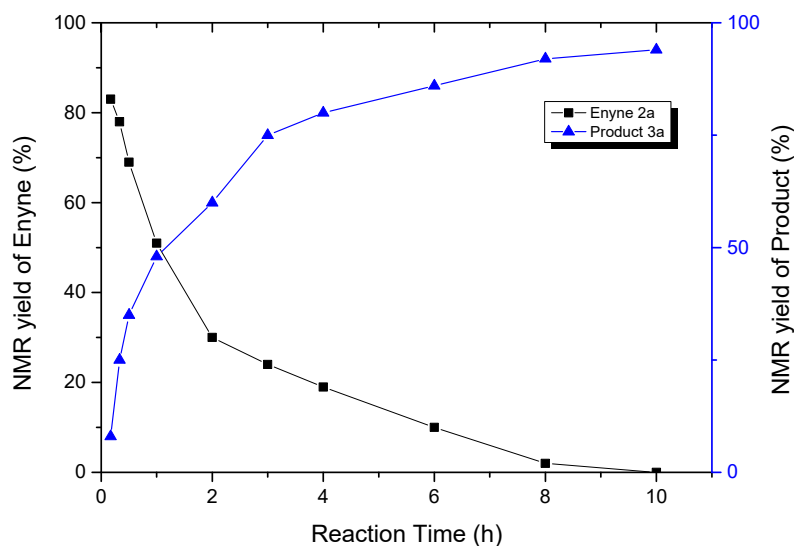

**Figure S2.** Reaction monitoring of **2a** and **(E)-3a**

## 5. Control experiments

### (1) Preparation of (*E*)-2-(1-phenylvinyl)hept-2-enoic acid [(*E*)-3a] via enyne (2a) (Yy-2-119)

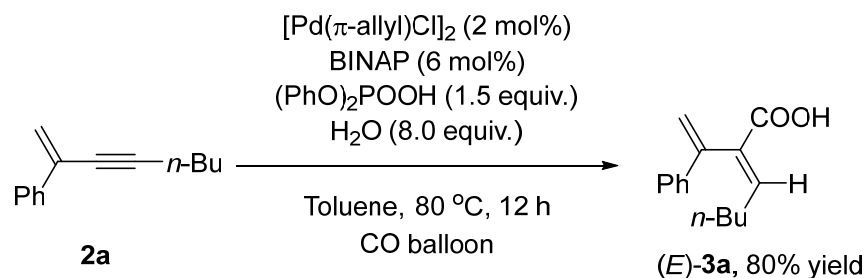

To a flame-dried Schlenk tube were added [Pd( $\pi$ -allyl)Cl]<sub>2</sub> (7.5 mg, 0.02 mmol), BINAP (39.3 mg, 0.06 mmol), and (PhO)<sub>2</sub>POOH (379.6 mg, 1.5 mmol) sequentially under argon. After addition of each chemical, the flask was degassed and refilled with Ar. Then **2a**<sup>1</sup> (182.2 mg, 1 mmol)/toluene (2 mL) and H<sub>2</sub>O (144.2 mg, 8 mmol)/toluene (3 mL) were added under argon. The resulting mixture was then frozen with a liquid nitrogen bath, degassed to remove the argon inside completely, and refilled with CO by a balloon of CO for three times. Then the resulting mixture was stirred at 80 °C with a balloon of CO for 12 h. After that, the resulting mixture was diluted with 5 mL of ethyl acetate, filtered through a short column of silica gel (2 cm) eluted with ethyl acetate (10 mL x 3), and concentrated. The residue was purified by column chromatography on silica gel to afford (*E*)-**3a** (182.9 mg, 80%) (eluent: petroleum ether/ethyl acetate = 20/1) as a yellow solid: <sup>1</sup>H NMR (400 MHz, CDCl<sub>3</sub>):  $\delta$  = 7.35 (d, *J* = 6.8 Hz, 2 H, Ar-H), 7.32-7.24 (m, 3 H, Ar-H), 7.19 (t, *J* = 7.6 Hz, 1 H, =CH), 5.79 (s, 1 H, one proton of =CH<sub>2</sub>), 5.11 (s, 1 H, one proton of =CH<sub>2</sub>), 2.22 (q, *J* = 7.5 Hz, 2 H, CH<sub>2</sub>), 1.46-1.36 (m, 2 H, CH<sub>2</sub>), 1.36-1.23 (m, 2 H, CH<sub>2</sub>), 0.85 (t, *J* = 7.4 Hz, 3 H, CH<sub>3</sub>); <sup>13</sup>C NMR (100 MHz, CDCl<sub>3</sub>)  $\delta$  = 172.2, 148.9, 142.1, 139.0, 132.9, 128.4, 127.8, 125.7, 116.6, 30.8, 29.5, 22.5, 13.8.

### (2) Preparation of methyl (*E*)-2-(1-phenylvinyl)hept-2-enoate [(*E*)-6] via (2-methoxyoct-3-yn-2-yl)benzene (5) (Yy-2-122)

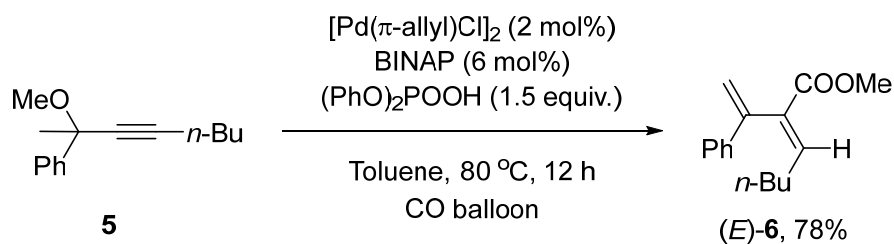

Following **Typical Procedure II**, the reaction of  $[\text{PdCl}(\pi\text{-allyl})]_2$  (7.5 mg, 0.02 mmol), BINAP (39.4 mg, 0.06 mmol),  $(\text{PhO})_2\text{POOH}$  (379.4 mg, 1.5 mmol), and **5** (215.6 mg, 1 mmol)/toluene (5 mL) afforded (*E*)-**6** (196.6 mg, 96% purity, 78%) (eluent: petroleum ether/ethyl acetate = 20/1) as a colorless oil:  $^1\text{H NMR}$  (400 MHz,  $\text{CDCl}_3$ )  $\delta$  = 7.40-7.20 (m, 5 H, Ar-H), 7.10 (t,  $J$  = 7.6 Hz, 1 H, =CH), 5.79 (s, 1 H, one proton of =CH<sub>2</sub>), 5.12 (s, 1 H, one proton of =CH<sub>2</sub>), 3.63 (s, 3 H, CH<sub>3</sub>), 2.22 (q,  $J$  = 7.3 Hz, 2 H, CH<sub>2</sub>), 1.48-1.38 (m, 2 H, CH<sub>2</sub>), 1.38-1.26 (m, 2 H, CH<sub>2</sub>), 0.86 (t,  $J$  = 7.2 Hz, 3 H, CH<sub>3</sub>);  $^{13}\text{C NMR}$  (100 MHz,  $\text{CDCl}_3$ )  $\delta$  = 167.4, 146.4, 142.6, 139.2, 133.3, 128.4, 127.7, 125.7, 116.2, 51.9, 31.0, 29.3, 22.5, 13.8; **IR** (neat):  $\nu$  = 2948, 2862, 1714, 1620, 1491, 1439, 1243, 1142, 1048  $\text{cm}^{-1}$ ; **MS** (70 eV, EI)  $m/z$  (%): 245 ( $\text{M}^+ + 1$ , 8.58), 244 ( $\text{M}^+$ , 48.44), 143 (100); **HRMS** Calcd for  $\text{C}_{16}\text{H}_{20}\text{O}_2$  ( $\text{M}^+$ ): 244.1463; Found: 244.1464.

### (3) Preparation of (*E*)-4-methyl-2-butylpent-2,4-dienoic acid [(*E*)-**4p**] via 2-methyloct-3-yn-2-ol (**1p**) (Yy-2-100)

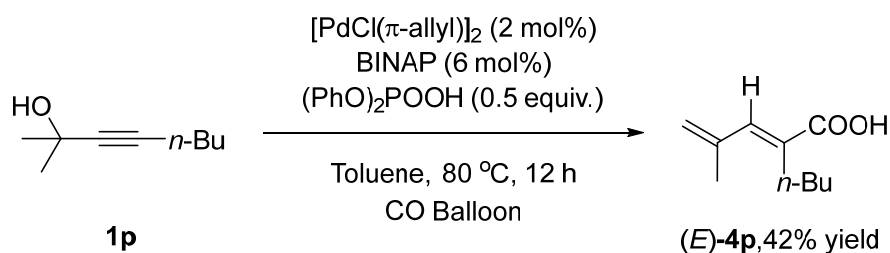

To a flame-dried Schlenk tube were added  $[\text{Pd}(\pi\text{-allyl})\text{Cl}]_2$  (7.5 mg, 0.02 mmol), BINAP (39.3 mg, 0.06 mmol), and  $(\text{PhO})_2\text{POOH}$  (126.3 mg, 0.5 mmol) sequentially under argon. After addition of each chemical, the flask was degassed and refilled with Ar. Then **1p** (140.4 mg, 1 mmol)/toluene (5 mL) was added under argon. The resulting mixture was subsequently frozen with a liquid nitrogen bath, degassed to remove the argon inside completely, and refilled with CO by a balloon of CO for three times. The

resulting mixture was stirred at 80 °C with a balloon of CO for 12 h. After that, the resulting mixture was diluted with 5 mL of ethyl acetate, filtered through a short column of silica gel (2 cm) eluted with ethyl acetate (10 mL x 3), and concentrated. The residue was purified by column chromatography on silica gel for double chromatography on silica gel to afford (*E*)-**4p** (79.3 mg, 90% purity, 42%) (first round eluent: petroleum ether/ethyl acetate = 20/1; Then all the crude product was collected for the second round chromatography, eluent: dichloromethane/MeOH = 150/1) as a yellow oil: <sup>1</sup>H NMR (400 MHz, CDCl<sub>3</sub>) δ = 7.23 (s, 1 H, =CH), 5.22 (s, 1 H, one proton of =CH<sub>2</sub>), 5.13 (s, 1 H, one proton of =CH<sub>2</sub>), 2.46 (t, *J* = 7.8 Hz, 2 H, CH<sub>2</sub>), 1.96 (s, 3 H, CH<sub>3</sub>), 1.50-1.30 (m, 4 H, CH<sub>2</sub> x 2), 0.91 (t, *J* = 7.2 Hz, 3 H, CH<sub>3</sub>); <sup>13</sup>C NMR (100 MHz, CDCl<sub>3</sub>) δ = 174.4, 142.7, 140.7, 131.8, 120.5, 32.2, 26.9, 22.8, 22.4, 13.9; IR (neat): ν = 2958, 2928, 2861, 1678, 1629, 1454, 1415, 1269, 1210, 1144, 1066 cm<sup>-1</sup>; MS (70 eV, EI) *m/z* (%): 169 (M<sup>+</sup>+1, 8.06), 168 (M<sup>+</sup>, 71.03), 79 (100); HRMS Calcd for C<sub>10</sub>H<sub>16</sub>O<sub>2</sub> (M<sup>+</sup>): 168.1150; Found: 168.1153.

**(4) Preparation of (*Z*)-3-phenyl-2-nonen-4-yne [(*Z*)-**2q**] and (*E*)-2-((*Z*)-1-phenylprop-1-en-1-yl)hept-2-enoic acid {[*2E*,2-(*1Z*)]-**3q**} via 3-phenylnon-4-yn-3-ol (**1q**) (Yy-3-090)**

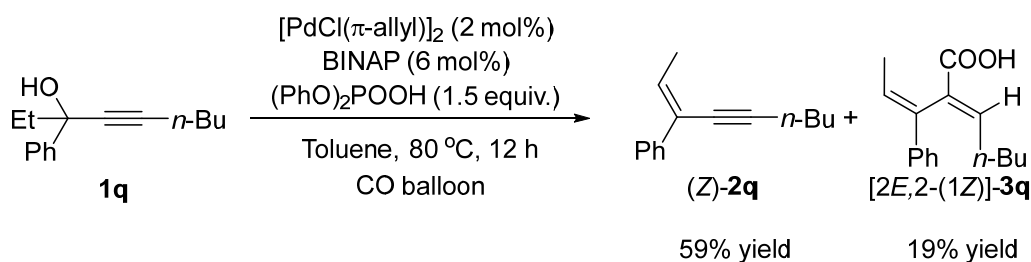

Following **Typical Procedure II**, the reaction of [PdCl(π-allyl)]<sub>2</sub> (7.5 mg, 0.02 mmol), BINAP (39.3 mg, 0.06 mmol), (PhO)<sub>2</sub>POOH (379.3 mg, 1.5 mmol), and **1q** (216.0 mg, 1 mmol)/toluene (5 mL) afforded (*Z*)-**2q**<sup>3</sup> [(117.3 mg, 59% yield, stabilized with 3.8 mg 2,6-di-tert-butyl-4-methylphenol (BHT)] and [*2E*,2-(*1Z*)]-**3q** (49.6 mg, 93% purity, 19% yield) (eluent: petroleum ether/ethyl acetate = 400/20 to 800/160) (v/v).

(*Z*)-**2q**<sup>3</sup>: yellow oil; <sup>1</sup>H NMR (*Z*)-**2q** (400 MHz, CDCl<sub>3</sub>) δ = 7.68-7.50 (m, 2 H,

Ar-H), 7.38-7.27 (m, 2 H, Ar-H), 7.27-7.18 (m, 1 H, Ar-H), 6.38 (q,  $J = 6.9$  Hz, 1 H, =CH), 2.47 (t,  $J = 7.0$  Hz, 2 H, CH<sub>2</sub>), 2.04 (d,  $J = 7.2$  Hz, 3 H, CH<sub>3</sub>), 1.72-1.45 (m, 4 H, CH<sub>2</sub> x 2), 0.95 (t,  $J = 7.4$  Hz, 3 H, CH<sub>3</sub>); <sup>13</sup>C NMR (100 MHz, CDCl<sub>3</sub>)  $\delta = 138.9, 131.5, 128.2, 127.1, 125.8, 124.7, 96.7, 77.6, 31.0, 22.0, 19.3, 16.7, 13.6$ ; IR (neat):  $\nu = 2958, 2931, 2872, 2860, 1494, 1466, 1446, 1433, 1348$  cm<sup>-1</sup>; MS (70 eV, EI)  $m/z$  (%): 199 (M<sup>+1</sup>, 16.69), 198 (M<sup>+</sup>, 100).

[2*E*,2-(1*Z*)]-3q: yellow oil; <sup>1</sup>H NMR (400 MHz, C<sub>6</sub>D<sub>6</sub>)  $\delta = 7.40$ -7.32 (m, 2 H, Ar-H), 7.27 (t,  $J = 7.4$  Hz, 1 H, =CH), 7.14-7.09 (m, 2 H, Ar-H), 7.08-7.00 (m, 1 H, Ar-H), 6.06 (q,  $J = 6.8$  Hz, 1 H, =CH), 1.86 (q,  $J = 7.3$  Hz, 2 H, CH<sub>2</sub>), 1.55 (d,  $J = 6.8$  Hz, 3 H, CH<sub>3</sub>), 1.16-0.97 (m, 4 H, CH<sub>2</sub> x 2), 0.68 (t,  $J = 7.0$  Hz, 3 H, CH<sub>3</sub>); <sup>13</sup>C NMR (100 MHz, CDCl<sub>3</sub>)  $\delta = 172.3, 149.2, 140.2, 135.1, 130.1, 128.3, 126.9, 126.4, 125.6, 30.3, 29.5, 22.5, 15.5, 13.8$ ; IR (neat):  $\nu = 2958, 2929, 2872, 2858, 2645, 2537, 1683, 1623, 1494, 1441, 1416, 1274, 1210, 1152, 1032$  cm<sup>-1</sup>; MS (70 eV, EI)  $m/z$  (%): 245 (M<sup>+1</sup>, 10.39), 244 (M<sup>+</sup>, 55.42), 129 (100); HRMS Calcd for C<sub>16</sub>H<sub>20</sub>O<sub>2</sub> (M<sup>+</sup>): 244.1463; Found: 244.1465.

**(5) Preparation of (*E*)-2-((*Z*)-1-phenylprop-1-en-1-yl)hept-2-enoic acid {[2*E*,2-(1*Z*)]-3q} via (*Z*)-3-phenyl-2-nonen-4-yne [(*Z*)-2q] (Yy-3-094)**

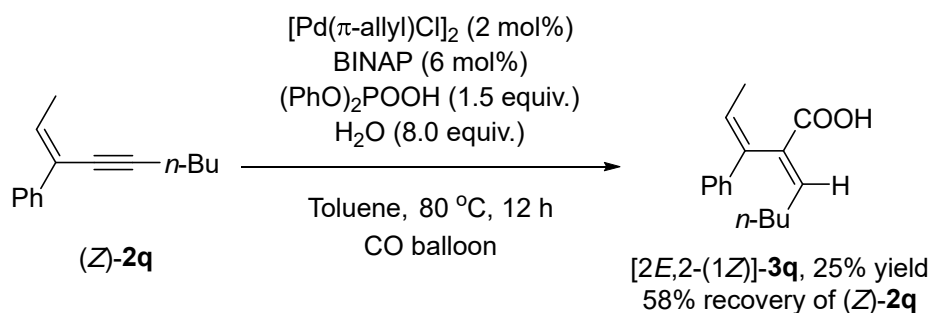

To a flame-dried Schlenk tube were added [Pd(π-allyl)Cl]<sub>2</sub> (7.5 mg, 0.02 mmol), BINAP (39.3 mg, 0.06 mmol), and (PhO)<sub>2</sub>POOH (379.1 mg, 1.5 mmol) sequentially under argon. After addition of each chemical, the flask was degassed and refilled with Ar. Then (*Z*)-2q (198.3 mg, 1 mmol)/toluene (2 mL) and H<sub>2</sub>O (144.4 mg, 8 mmol)/toluene (3 mL) were added under argon. The resulting mixture was then frozen with a liquid nitrogen bath, degassed to remove the argon inside completely, and



refilled with CO by a balloon of CO for three times. Then the resulting mixture was stirred at 80 °C with a balloon of CO for 12 h. After that, the resulting mixture was diluted with 5 mL of ethyl acetate, filtered through a short column of silica gel (1 cm) eluted with ethyl acetate (10 mL x 3), and concentrated. The residue was purified by column chromatography on silica gel to afford [2*E*,2-(1*Z*)]-**3q** (66.3 mg, 93% purity, 25%) and (*Z*)-**2q** [115.0 mg, 58% yield, stabilized with 3.8 mg 2,6-di-*tert*-butyl-4-methylphenol (BHT)] (eluent: petroleum ether/ethyl acetate = 500/0 to 400/20 to 800/160) (v/v).

(*Z*)-**2q**<sup>3</sup>: <sup>1</sup>H NMR (400 MHz, CDCl<sub>3</sub>) δ = 7.65-7.50 (m, 2 H, Ar-H), 7.38-7.26 (m, 2 H, Ar-H), 7.26-7.16 (m, 1 H, Ar-H), 6.38 (q, *J* = 6.9 Hz, 1 H, =CH), 2.47 (t, *J* = 7.0 Hz, 2 H, CH<sub>2</sub>), 2.04 (d, *J* = 7.2 Hz, 3 H, CH<sub>3</sub>), 1.69-1.45 (m, 4 H, CH<sub>2</sub> x 2), 0.95 (t, *J* = 7.2 Hz, 3 H, CH<sub>3</sub>).

[2*E*,2-(1*Z*)]-**3q**: <sup>1</sup>H NMR (400 MHz, CDCl<sub>3</sub>) δ = 7.40-7.15 (m, 6 H, Ar-H and =CH), 6.24 (q, *J* = 6.8 Hz, 1 H, =CH), 2.09 (q, *J* = 7.3 Hz, 2 H, CH<sub>2</sub>), 1.69 (d, *J* = 6.8 Hz, 3 H, CH<sub>3</sub>), 1.48-1.20 (m, 4 H, CH<sub>2</sub> x 2), 0.84 (t, *J* = 7.2 Hz, 3 H, CH<sub>3</sub>).

## 6. Synthetic applications:

### (1) Preparation of methyl (*E*)-2-(1-(4-bromophenyl)vinyl)non-2-enoate (**Yy-2-161**)

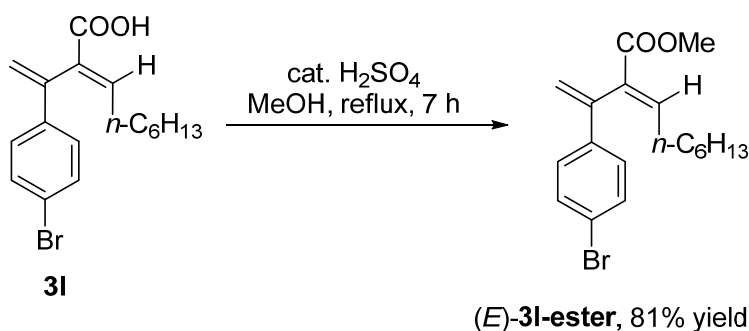

To a flame-dried flask were added (*E*)-**3I** (790.3 mg, 2.34 mmol) and 20 mL MeOH, then 5 drop of conc. H<sub>2</sub>SO<sub>4</sub> in 10 mL MeOH was added. The resulting mixture was refluxed for 7 h. After cooling to room temperature, the mixture was quenched with a saturated aqueous solution of NaHCO<sub>3</sub> (20 mL) and extracted with

ethyl acetate (30 mL x 3). The organic layer was washed with a saturated aqueous solution of NaCl (50 mL) and dried over anhydrous Na<sub>2</sub>SO<sub>4</sub>. After filtration and concentration under reduced pressure, the crude product was purified by column chromatography on silica gel to afford (*E*)-**3I-ester** (668.6 mg, 81%) (eluent: petroleum ether/ethyl acetate = 20/1) as a colorless oil: <sup>1</sup>H NMR (400 MHz, CDCl<sub>3</sub>) δ = 7.43 (d, *J* = 8.8 Hz, 2 H, Ar-H), 7.25-7.18 (m, 2 H, Ar-H), 7.10 (t, *J* = 7.8 Hz, 1 H, =CH), 5.77 (s, 1 H, one proton of =CH<sub>2</sub>), 5.13 (s, 1 H, one proton of =CH<sub>2</sub>), 3.64 (s, 3 H, OCH<sub>3</sub>), 2.19 (q, *J* = 7.5 Hz, 2 H, CH<sub>2</sub>), 1.50-1.36 (m, 2 H, CH<sub>2</sub>), 1.34-1.16 (m, 6 H, CH<sub>2</sub> x 3), 0.86 (t, *J* = 6.8 Hz, 3 H); <sup>13</sup>C NMR (100 MHz, CDCl<sub>3</sub>) δ = 167.2, 146.9, 141.6, 138.3, 132.8, 131.5, 127.4, 121.8, 116.8, 51.9, 31.5, 29.6, 29.0, 28.8, 22.5, 14.0; IR (neat): ν = 2924, 2856, 1715, 1637, 1483, 1435, 1386, 1240, 1191, 1057, 1005 cm<sup>-1</sup>; MS (70 eV, EI) *m/z* (%): 353 [M<sup>+</sup>(<sup>81</sup>Br)+1, 8.82], 352 [M<sup>+</sup>(<sup>81</sup>Br), 45.4], 351 [M<sup>+</sup>(<sup>79</sup>Br)+1, 11.39], 350 [M<sup>+</sup>(<sup>79</sup>Br), 46.2], 141 (100); HRMS Calcd for C<sub>18</sub>H<sub>23</sub><sup>79</sup>BrO<sub>2</sub> (M<sup>+</sup>): 350.0876; Found: 350.0878.

**(2) Preparation of (*E*)-2-(1-(4-bromophenyl)vinyl)-*N*-methoxy-*N*-methylnon-2-enamide [(*E*)-**3I-Weinreb amide**] <sup>4</sup> (Yy-2-180)**

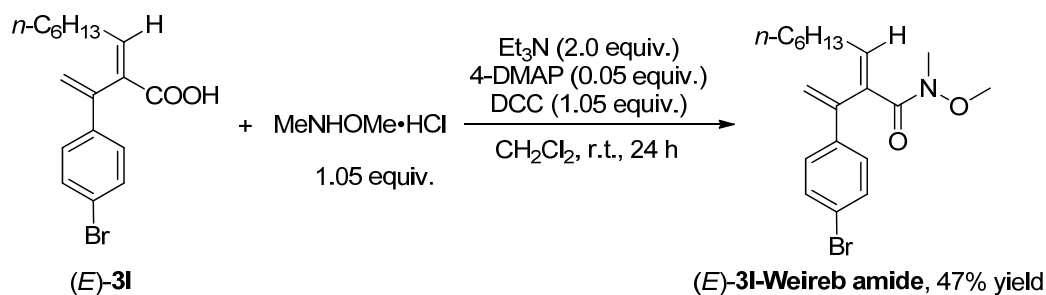

To a Schlenk tube equipped with an empty balloon were added (*E*)-**3I** (674.3 mg, 2 mmol), MeNHOMe·HCl (206.8 mg, 2.1 mmol), and CH<sub>2</sub>Cl<sub>2</sub> (4 mL). The reaction was then stirred at 0 °C for 5 min, Et<sub>3</sub>N (0.56 mL, d = 0.728 g/mol, 407.7mg, 4 mmol), 4-DMAP (12.2 mg, 0.10 mmol), DCC (442.3 mg, 2.1 mmol), and CH<sub>2</sub>Cl<sub>2</sub> (2 mL) were then added sequentially. The resulting mixture was stirred at room temperature for 24 h before diluted with CH<sub>2</sub>Cl<sub>2</sub> (15 mL) and quenched with H<sub>2</sub>O (25 mL). The organic layer was separated and the aqueous phase was extracted with CH<sub>2</sub>Cl<sub>2</sub> (20

mL), the organic phase was combined and washed with a saturated solution of NaHCO<sub>3</sub>, H<sub>2</sub>O, a saturated solution of NaCl (aq.) sequentially, and dried over anhydrous MgSO<sub>4</sub>. After filtration and concentration under reduced pressure, the crude product was purified by column chromatography on silica gel to afford (*E*)-**3l-Weinreb amide** (368.4 mg, 98% purity, 47%) (eluent: petroleum ether/ethyl acetate = 200/10 to 600/60) as a colorless oil: <sup>1</sup>H NMR (400 MHz, CDCl<sub>3</sub>) δ = 7.44 (d, *J* = 8.8 Hz, 2 H, Ar-H), 7.34 (d, *J* = 8.4 Hz, 2 H, Ar-H), 6.42 (t, *J* = 7.6 Hz, 1 H, =CH), 5.68 (s, 1 H, one proton of =CH<sub>2</sub>), 5.20 (s, 1 H, one proton of =CH<sub>2</sub>), 3.46 (s, 3 H, OCH<sub>3</sub>), 3.14 (s, 3 H, NCH<sub>3</sub>), 2.04 (q, *J* = 7.5 Hz, 2 H, CH<sub>2</sub>), 1.44-1.32 (m, 2 H, CH<sub>2</sub>), 1.32-1.10 (m, 6 H, CH<sub>2</sub> x 3), 0.85 (t, *J* = 6.8 Hz, 3 H, CH<sub>3</sub>); <sup>13</sup>C NMR (100 MHz, CDCl<sub>3</sub>) δ = 170.7, 142.6, 140.7, 138.3, 135.3, 131.3, 128.1, 121.7, 115.6, 60.4, 33.4, 31.4, 29.1, 28.9, 28.8, 22.4, 14.0; IR (neat): ν = 2924, 2856, 1648, 1455, 1363, 1182, 1110, 1071 cm<sup>-1</sup>; MS (70 eV, EI) *m/z* (%): 382 [M<sup>+</sup>(Br<sup>81</sup>)+1, 1.84], 381 [M<sup>+</sup>(Br<sup>81</sup>), 8.21], 380 [M<sup>+</sup>(<sup>79</sup>Br)+1, 1.92], 379 [M<sup>+</sup>(<sup>79</sup>Br), 8.09], 142 (100); HRMS Calcd for C<sub>19</sub>H<sub>26</sub><sup>79</sup>BrNO<sub>2</sub> (M<sup>+</sup>): 379.1147; Found: 379.1151.

### (3) Coupling<sup>5</sup> of (*E*)-**3l-ester** with (3-nitrophenyl)boronic acid (**Yy-2-141**)

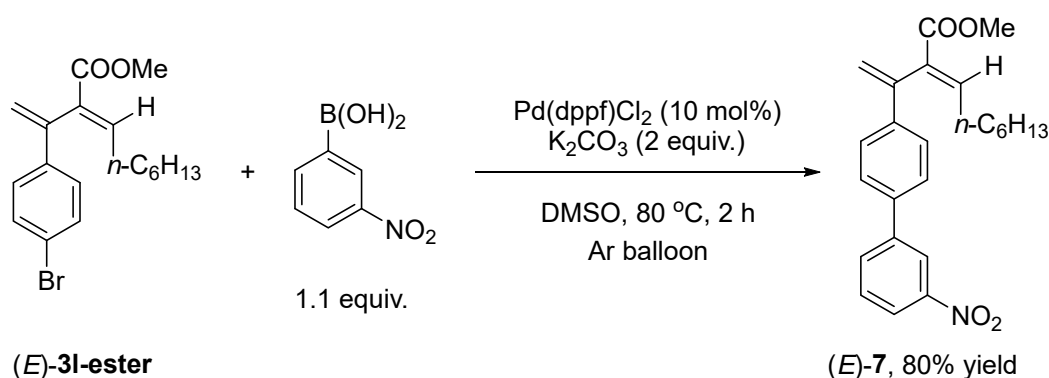

To a flame-dried Schlenk tube were added Pd(dppf)Cl<sub>2</sub> (14.6 mg, 0.02 mmol), (3-nitrophenyl)boronic acid (37.5 mg, 0.22 mmol), and K<sub>2</sub>CO<sub>3</sub> (55.4 mg, 0.4 mmol) sequentially. After addition of each chemical, the flask was degassed and refilled with argon. Then (*E*)-**3l-ester** (70.2 mg, 0.2 mmol)/DMSO (2 mL) was added under argon. The resulting mixture was stirred at 80 °C with a balloon of argon for 2 h, diluted with 2 mL of ethyl acetate, cooled to room temperature, and quenched with 10 mL of H<sub>2</sub>O.

After extraction with ethyl acetate (20 mL x 3) and washed with a saturated solution of NaCl (10 mL x 3), the organic layer was dried over anhydrous Na<sub>2</sub>SO<sub>4</sub>. After filtration through a layer of silica gel and concentration under reduced pressure, the residue was purified by column chromatography on silica gel using a pipette column to afford (*E*)-**7** (66.8 mg, 94% purity, 80%) (eluent: petroleum ether/ethyl acetate = 100/1 to 100/5) (v/v) as a colorless oil: <sup>1</sup>H NMR (400 MHz, CDCl<sub>3</sub>) δ = 8.45 (t, *J* = 1.8 Hz, 1 H, Ar-H), 8.19 (dd, *J*<sub>1</sub> = 7.8 Hz, *J*<sub>2</sub> = 1.4 Hz, 1 H, Ar-H), 7.91 (d, *J* = 7.6 Hz, 1 H, Ar-H), 7.66-7.55 (m, 3 H, Ar-H), 7.49 (d, *J* = 8.4 Hz, 2 H, Ar-H), 7.15 (t, *J* = 7.6 Hz, 1 H, =CH), 5.88 (s, 1 H, one proton of =CH<sub>2</sub>), 5.20 (s, 1 H, one proton of =CH<sub>2</sub>), 3.67 (s, 3 H, OCH<sub>3</sub>), 2.24 (q, *J* = 7.5 Hz, 2 H, CH<sub>2</sub>), 1.54-1.40 (m, 2 H, CH<sub>2</sub>), 1.38-1.18 (m, 6 H, CH<sub>2</sub> x 3), 0.86 (t, *J* = 6.6 Hz, 3 H, CH<sub>3</sub>); <sup>13</sup>C NMR (100 MHz, CDCl<sub>3</sub>) δ = 167.3, 148.7, 146.8, 142.4, 141.9, 139.6, 137.9, 133.0, 132.8, 129.7, 127.2, 126.5, 122.0, 121.7, 117.0, 52.0, 31.5, 29.6, 29.1, 28.8, 22.5, 14.0; IR (neat): 2925, 2855, 1713, 1529, 1435, 1347, 1242, 1054 cm<sup>-1</sup>; MS (70 eV, EI) *m/z* (%): 394 (M<sup>+</sup>+1, 17.36), 393 (M<sup>+</sup>, 66.39), 264 (100); HRMS Calcd for C<sub>24</sub>H<sub>27</sub>NO<sub>4</sub>: 393.1940; Found: 393.1936.

#### (4) Reduction <sup>6</sup> of (*E*)-**3I**-ester with DIBAL-H (Yy-2-146)

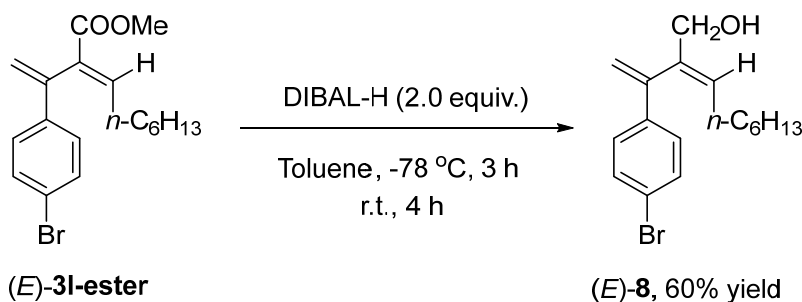

To a flame-dried Schlenk tube was added (*E*)-**3I-ester** (175.4 mg, 0.5 mmol)/toluene (5 mL). After the tube was stirred at -78°C for 10 min, DIBAL-H (1 mL, 1.0 M in toluene, 1 mmol) was added dropwise within 5 min. The resulting mixture was stirred at -78°C for 3 hours and stirred at room temperature for 4 h, quenched with a saturated solution of potassium sodium tartrate (Rochelle's salt) (5 mL), extracted with Et<sub>2</sub>O (5 mL x 3), dried over anhydrous MgSO<sub>4</sub>, filtered, and

concentrated *in vacuo*. The residue was purified by column chromatography on silica gel to afford (*E*)-**8** (96.4 mg, 60%) as a colorless oil (eluent: petroleum ether/ethyl acetate = 200/10 to 200/20) (v/v):  $^1\text{H NMR}$  (400 MHz,  $\text{CDCl}_3$ )  $\delta$  = 7.44 (d,  $J$  = 8.8 Hz, 2 H, Ar-H), 7.27 (d,  $J$  = 8.4 Hz, 2 H, Ar-H), 5.76 (t,  $J$  = 7.4 Hz, 1 H, =CH), 5.65 (d,  $J$  = 1.6 Hz, 1 H, one proton of =CH<sub>2</sub>), 5.14 (d,  $J$  = 1.2 Hz, 1 H, one proton of =CH<sub>2</sub>), 4.07 (s, 2 H, CH<sub>2</sub>O), 2.01 (q,  $J$  = 7.3 Hz, 2 H, CH<sub>2</sub>), 1.53 (br, 1 H, OH), 1.40-1.15 (m, 8 H, CH<sub>2</sub> x 4), 0.86 (t,  $J$  = 6.8 Hz, 3 H, CH<sub>3</sub>);  $^{13}\text{C NMR}$  (100 MHz,  $\text{CDCl}_3$ )  $\delta$  = 144.3, 139.4, 138.1, 131.5, 130.9, 128.0, 121.8, 115.8, 66.6, 31.6, 29.6, 29.0, 28.7, 22.6, 14.0; **IR** (neat): 3315 (br), 2954, 2922, 2853, 1484, 1458, 1387, 1071, 1006  $\text{cm}^{-1}$ ; **MS** (70 eV, EI)  $m/z$  (%): 325 [ $\text{M}^+(\text{}^{81}\text{Br})+1$ , 2.53], 324 [ $\text{M}^+(\text{}^{81}\text{Br})$ , 10.12], 323 [ $\text{M}^+(\text{}^{79}\text{Br})+1$ , 2.02], 322 [ $\text{M}^+(\text{}^{79}\text{Br})$ , 10.56], 212 (100); **HRMS** Calcd for  $\text{C}_{17}\text{H}_{23}\text{}^{79}\text{BrO}$  ( $\text{M}^+$ ): 322.0932; Found: 322.0936.

#### (5) Reduction of (*E*)-**3I**-Weinreb amide with $\text{LiAlH}_4$ <sup>7</sup> (Yy-2-183)

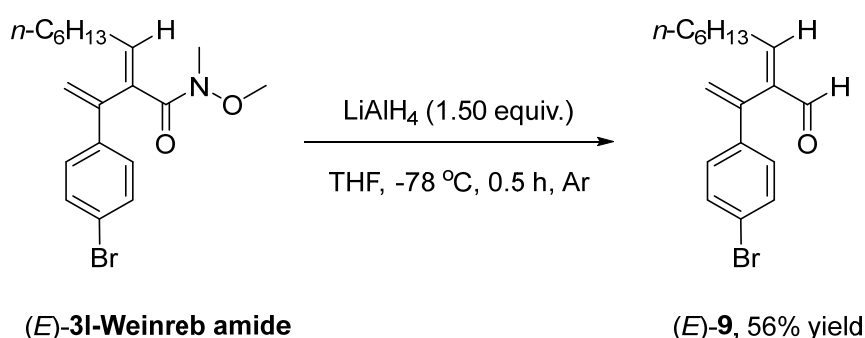

To a flame-dried Schlenk tube fulfilled with argon were added (*E*)-**3I-Weinreb amide** (150.7 mg, 0.4 mmol) and THF (5 mL). The reaction was stirred at -78 °C for 10 min,  $\text{LiAlH}_4$  (0.6 mL, 1 M in THF, 0.6 mmol) was then added dropwise within 2 min. The resulting mixture was stirred at -78 °C for 0.5 h, quenched with ethyl acetate (5 mL), and poured into 1 M HCl (20 mL). After extraction with ethyl acetate (15 mL x 3), the organic layer was washed with a saturated solution of NaCl (aq.) and dried over anhydrous  $\text{Na}_2\text{SO}_4$ . After filtration and concentration under reduced pressure, the crude product was purified by column chromatography on silica gel to afford (*E*)-**9** (78.9 mg, 90% purity, 56%) (eluent: petroleum ether/ethyl acetate = 50/1) as a colorless oil:  $^1\text{H NMR}$  (400 MHz,  $\text{CDCl}_3$ )  $\delta$  = 9.54 (s, 1 H, CHO), 7.42 (d,  $J$  = 8.0 Hz,

2 H, Ar-H), 7.17 (d,  $J = 8.4$  Hz, 2 H, Ar-H), 6.81 (t,  $J = 7.6$  Hz, 1 H, =CH), 5.84 (s, 1 H, one proton of =CH<sub>2</sub>), 5.12 (s, 1 H, one proton of =CH<sub>2</sub>), 2.30 (q,  $J = 7.5$  Hz, 2 H, CH<sub>2</sub>), 1.52-1.38 (m, 2 H, CH<sub>2</sub>), 1.36-1.08 (m, 6 H, CH<sub>2</sub> x 3), 0.86 (t,  $J = 6.8$  Hz, 3 H, CH<sub>3</sub>); **<sup>13</sup>C NMR** (100 MHz, CDCl<sub>3</sub>)  $\delta = 193.2, 157.4, 144.0, 139.7, 137.7, 131.6, 127.4, 121.9, 117.6, 31.4, 29.9, 29.0, 28.5, 22.5, 14.0$ ; **IR** (neat):  $\nu = 3442$  (br), 2923, 2856, 1685, 1590, 1483, 1392, 1272, 1217, 1071, 1006 cm<sup>-1</sup>; **MS** (70 eV, EI)  $m/z$  (%): 323 [M<sup>+</sup>(<sup>81</sup>Br)+1, 3.02], 322 [M<sup>+</sup>(<sup>81</sup>Br), 15.02], 321 [M<sup>+</sup>(<sup>79</sup>Br)+1, 5.44], 320 [M<sup>+</sup>(<sup>79</sup>Br), 14.94], 149 (100); **HRMS** Calcd for C<sub>17</sub>H<sub>21</sub><sup>79</sup>BrO (M<sup>+</sup>): 320.0776; Found: 320.0772.

## References:

1. Zhang, W.; Huang, C.; Yuan, Y.; Ma, S. Catalytic transient leaving group for atom-economic synthesis of allenes from 2-alkynols. *Chem. Commun.* **2017**, *53*, 12430-12433.
2. Ide, J.; Kishida, Y. The formation of some stable sulfoxonium ylides from acetylenic compounds and some further reactions of these stable ylides. *Tetrahedron Lett.* **1966**, *7*, 1787-1796.
3. Callingham, M.; Partridge, B. M.; Lewis, W.; Lam, H. W. Enantioselective Rhodium-Catalyzed Coupling of Arylboronic Acids, 1, 3-Enynes, and Imines by Alkenyl-to-Allyl 1, 4-Rhodium (I) Migration. *Angew. Chem. Int. Ed.* **2017**, *129*, 16570-16574.
4. (a) Nahm, S.; Weinreb, S. M. N-Methoxy-N-methylamides as effective acylating agents. *Tetrahedron Lett.* **1981**, *22*, 3815-3818; (b) Iriarte, I.; Olaizola, O.; Vera, S.; Gamboa, I.; Oiarbide, M.; Palomo, C. Controlling  $\alpha$ - vs  $\gamma$ -Reactivity of Vinylogous Ketone Enolates in Organocatalytic Enantioselective Michael Reactions. *Angew. Chem. Int. Ed.* **2017**, *56*, 8860-8864.
5. Miyaura, N.; Yanagi, T.; Suzuki, A. The Palladium-catalyzed Cross-coupling Reaction of Phenylboronic Acid with Haloarenes in the Presence of Base. *Synth. Commun.* **1981**, *11*, 513-515.
6. Deng, Y.; Jin, X.; Ma, S. Studies on Highly Stereoselective Addition-Elimination Reactions of 3-(Methoxycarbonyl)-1, 2-allen-4-ols with MX. An Efficient Synthesis of 3-(Methoxycarbonyl)-2-halo-1, 3 (Z)-dienes. *J. Org. Chem.* **2007**, *72*, 5901-5904.
7. Conroy, T.; Guo, J. T.; Hunt, N. H.; Payne, R. J. Total synthesis and antimalarial activity of symprostatin 4. *Org. Lett.* **2010**, *12*, 5576-5579.

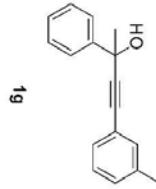

YY-2-078-H  
 Dec 20 2017  
 NA = 4  
 Solvent = cdcl3  
 F1 = 399.749542 MHz  
 F2 = 100.526031 MHz

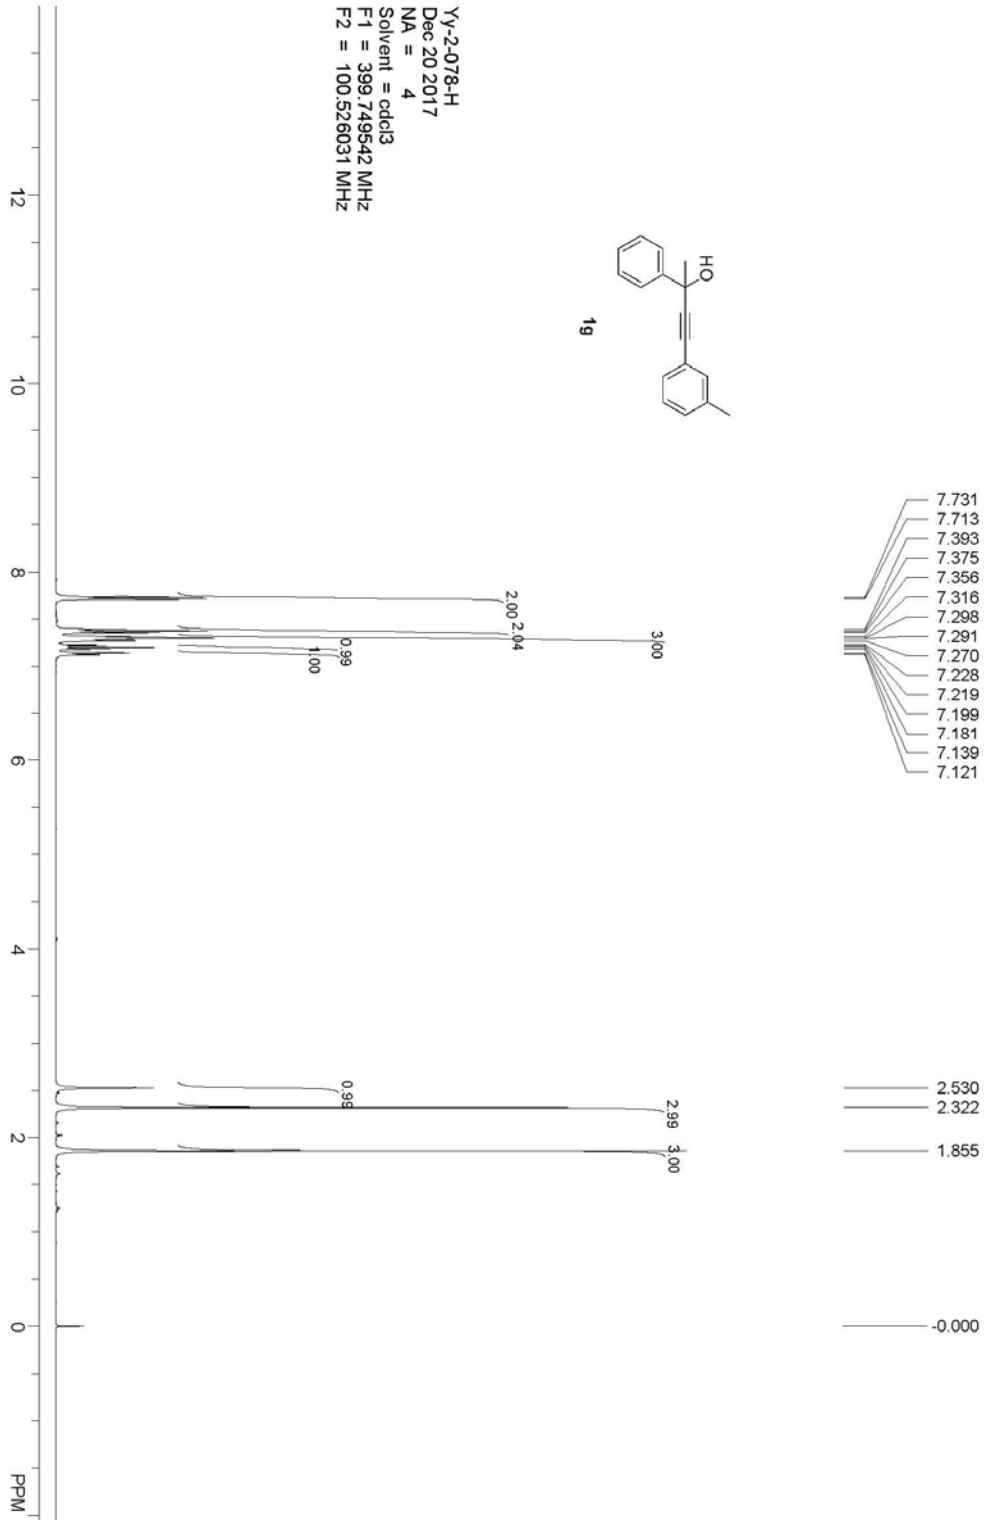



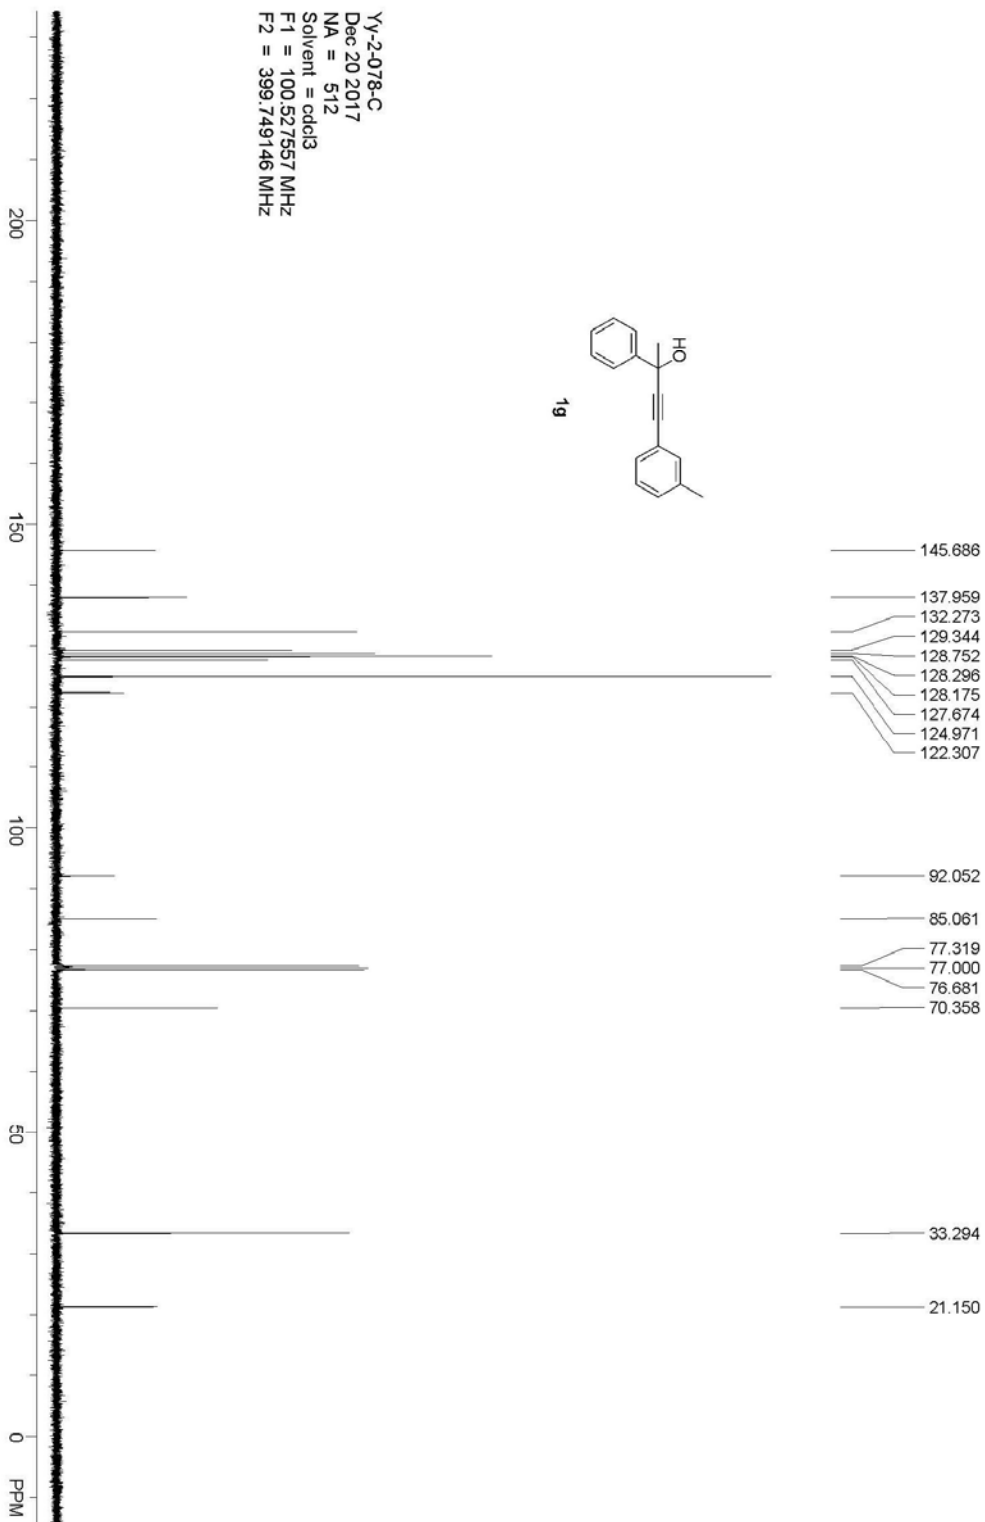

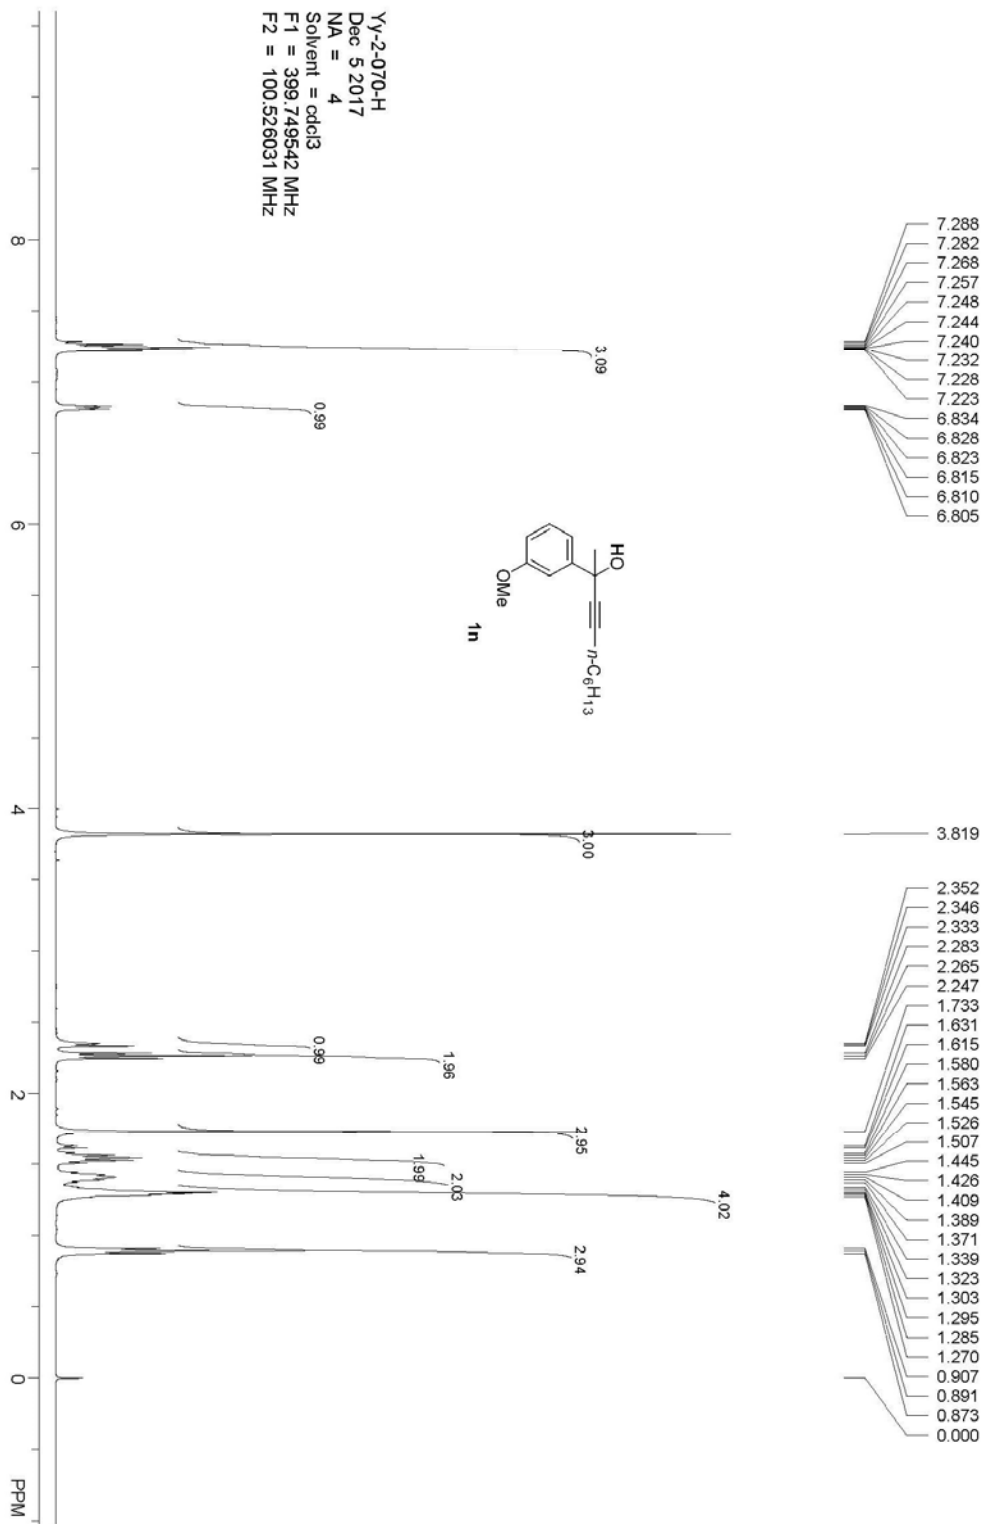

Yy-2-070-C  
Dec 5 2017  
NA = 256  
Solvent = cdcl3  
F1 = 100.527557 MHz  
F2 = 399.749146 MHz

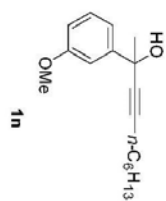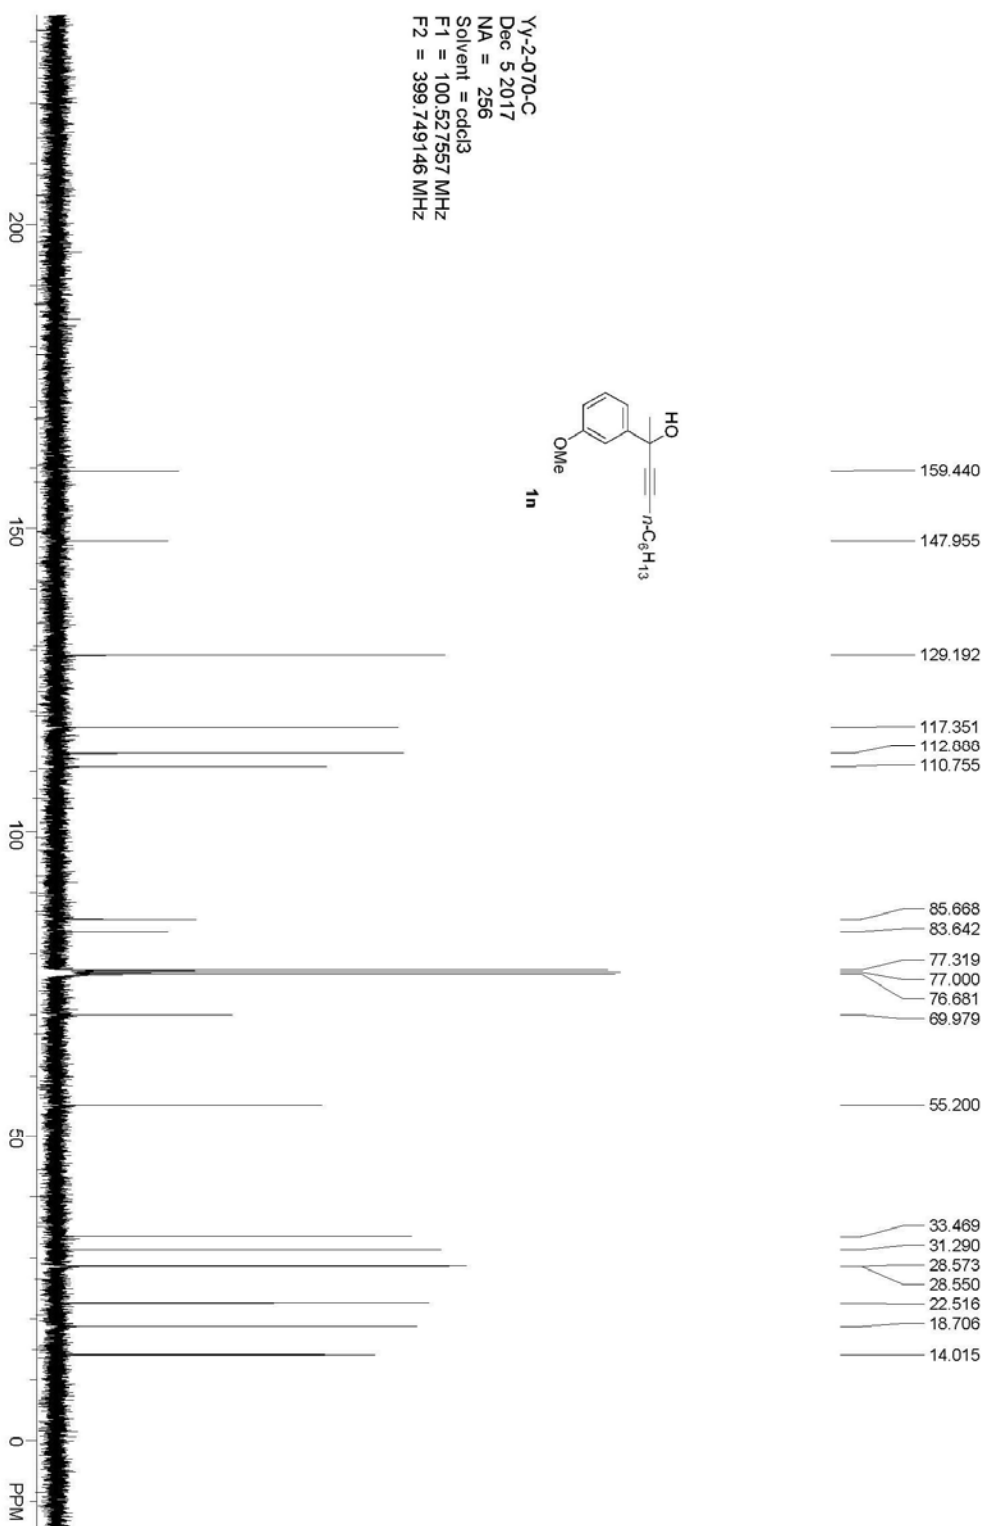

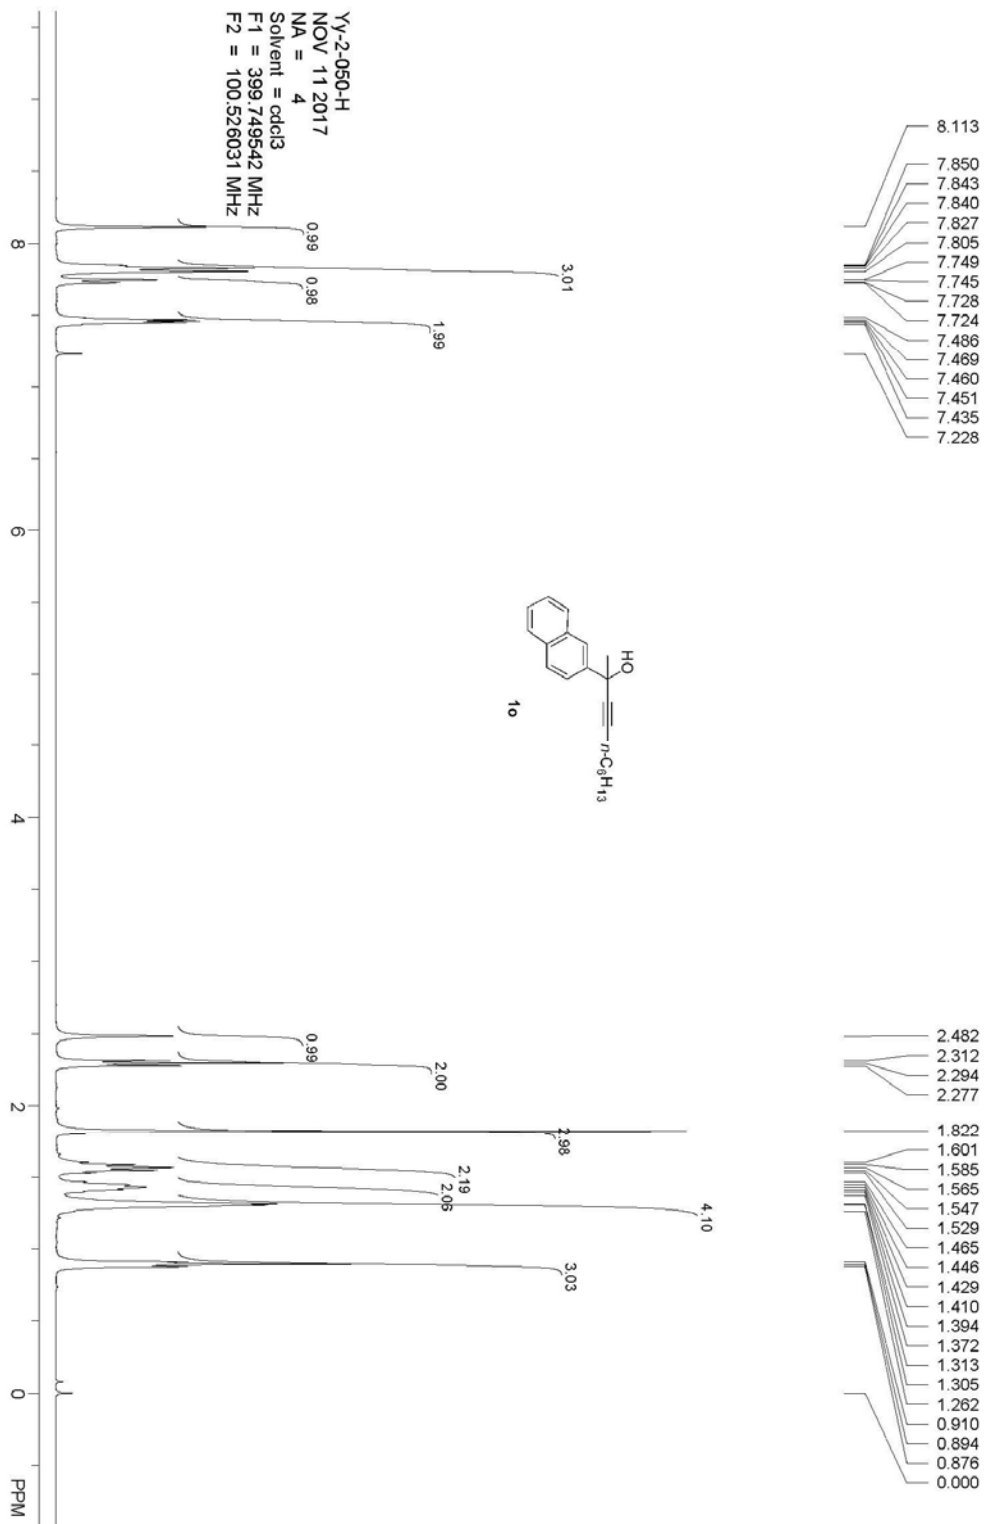

YY-2-050-C  
NOV 11 2018  
NA = 512  
Solvent = cdcl3  
F1 = 100.527557 MHz  
F2 = 399.749146 MHz

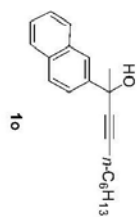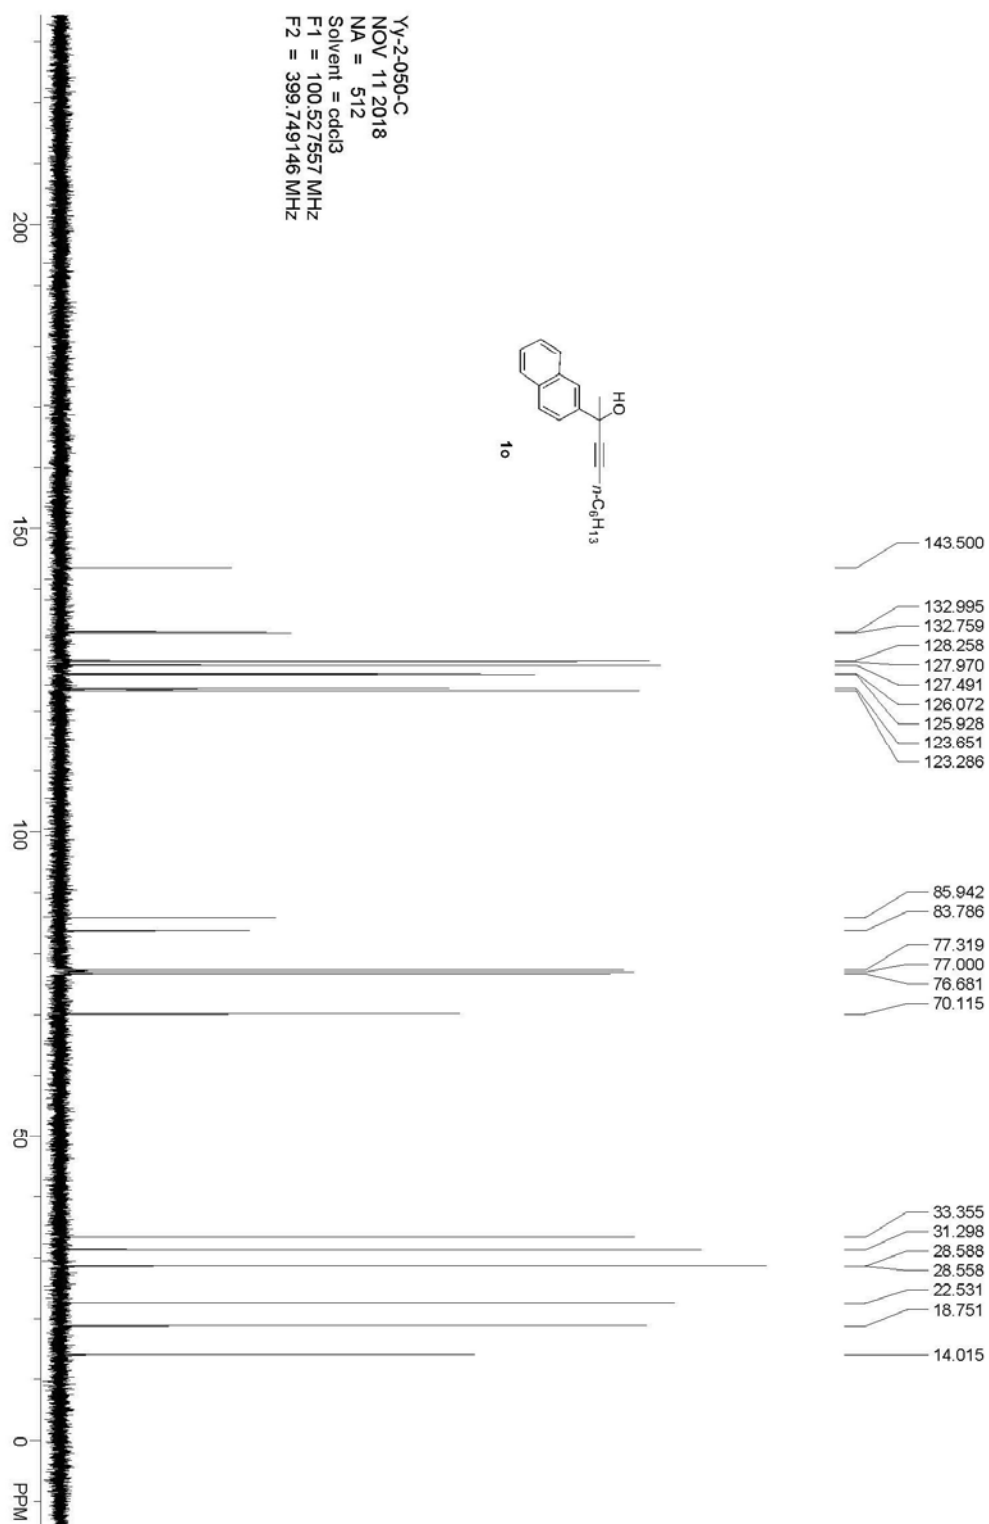

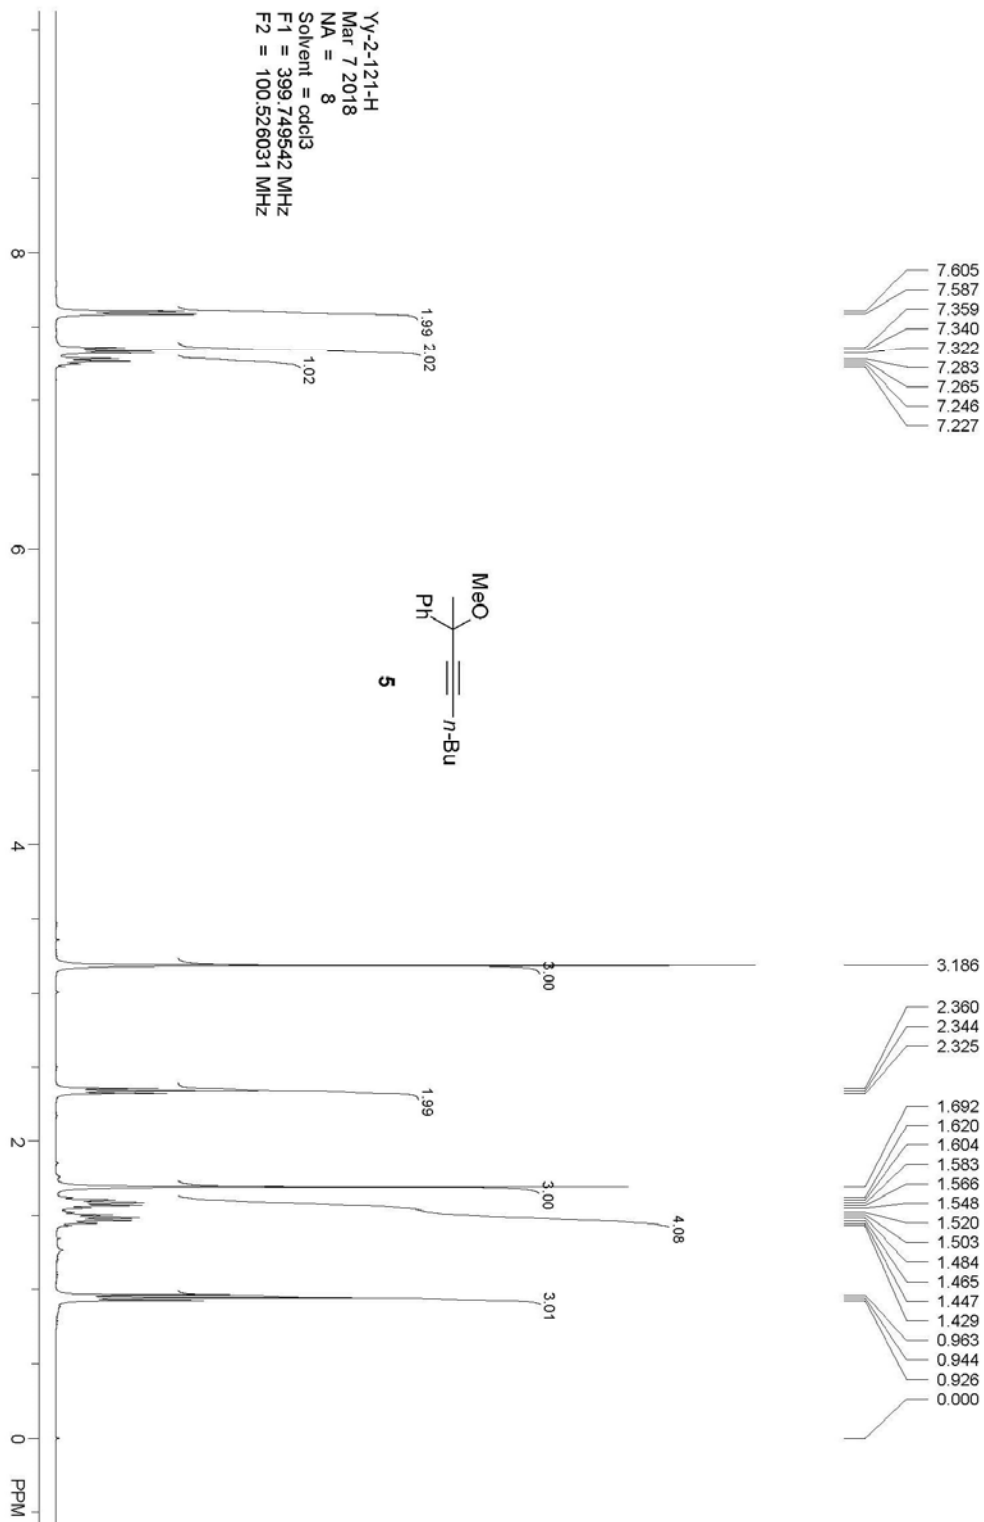

Yy-2-121-C  
Mar 7 2018  
NA = 512  
Solvent = cdcl3  
F1 = 100.527557 MHz  
F2 = 399.749146 MHz

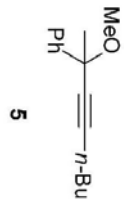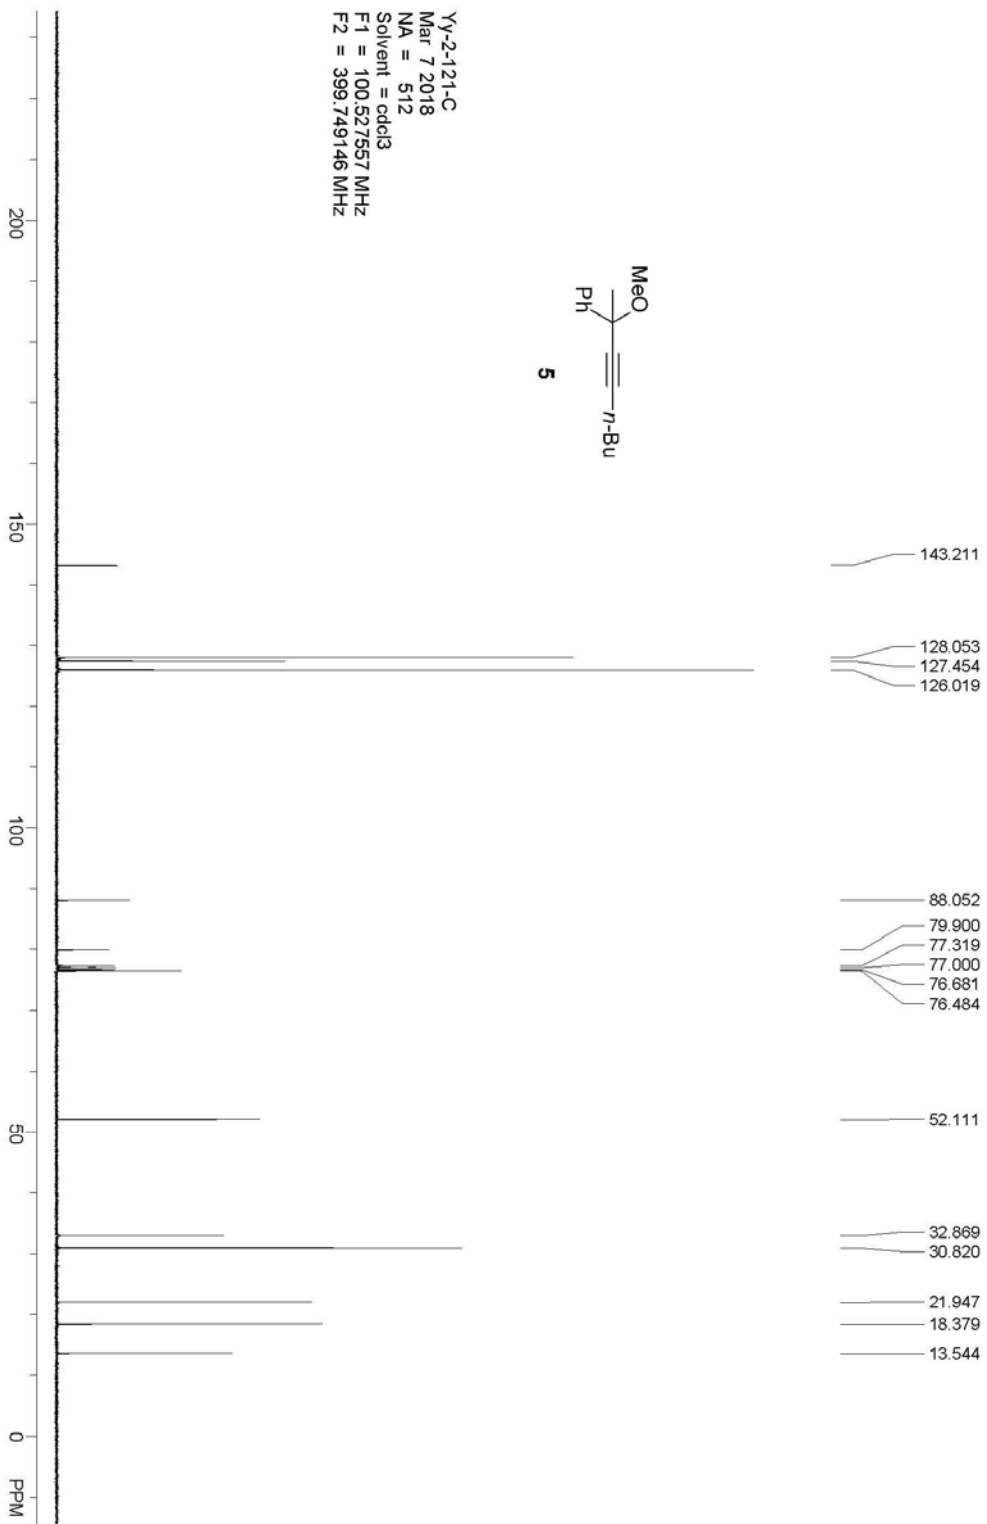

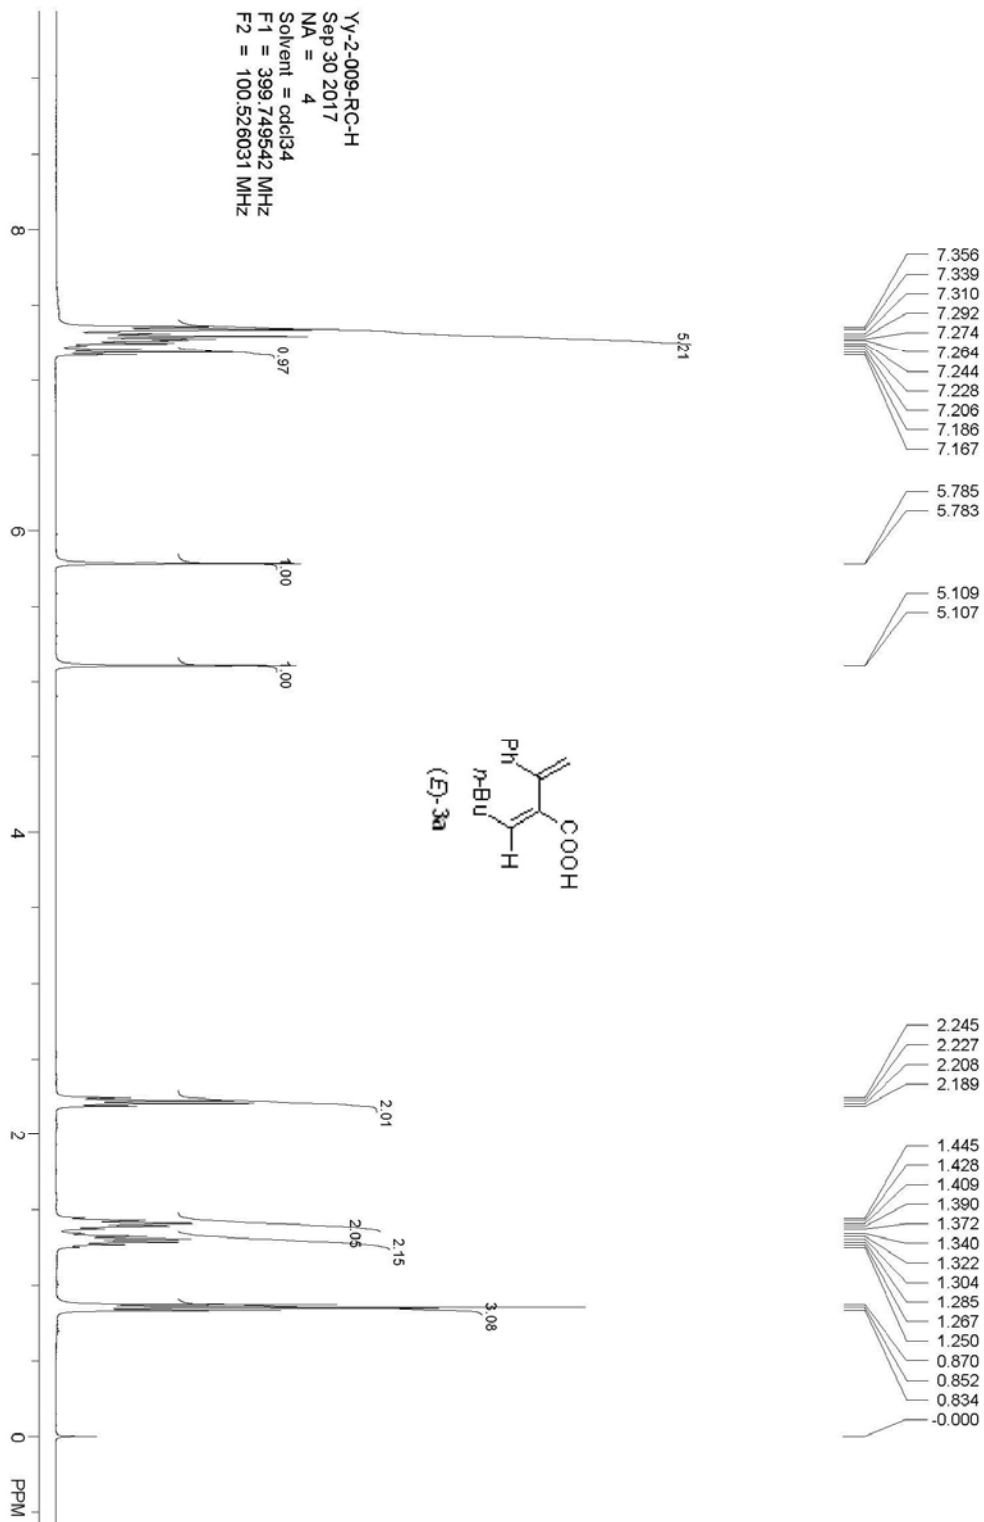



YY-2-009-RC-C  
Sep 30 2017  
NA = 64  
Solvent = cdcl3  
F1 = 100.527557 MHz  
F2 = 399.749146 MHz

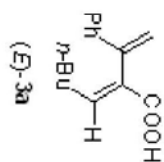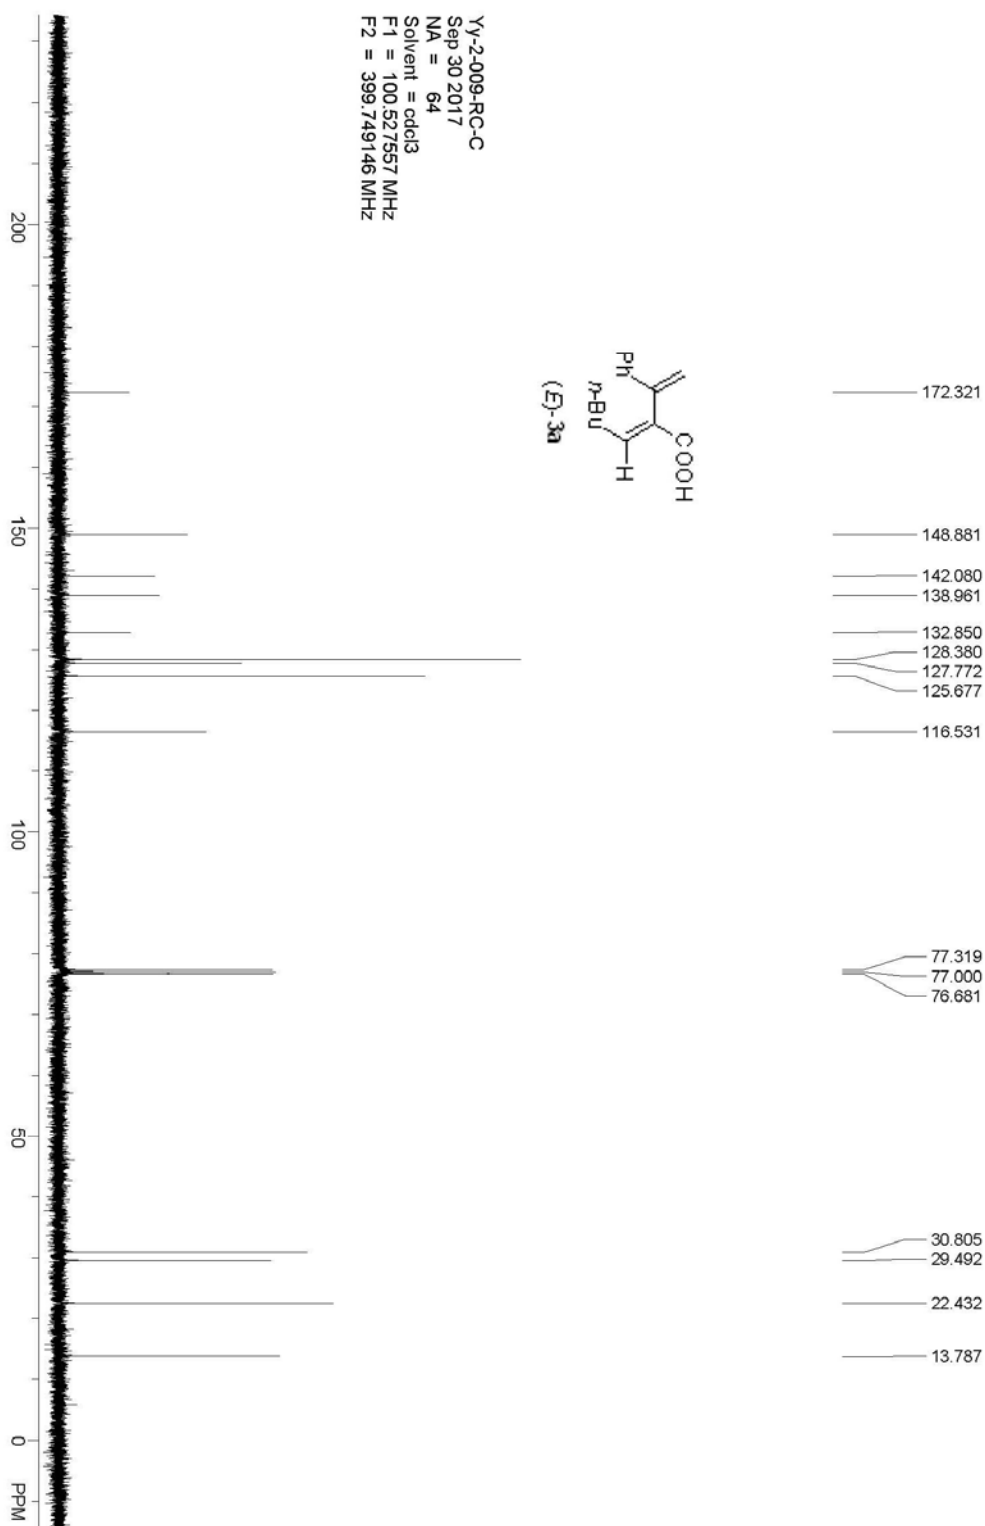

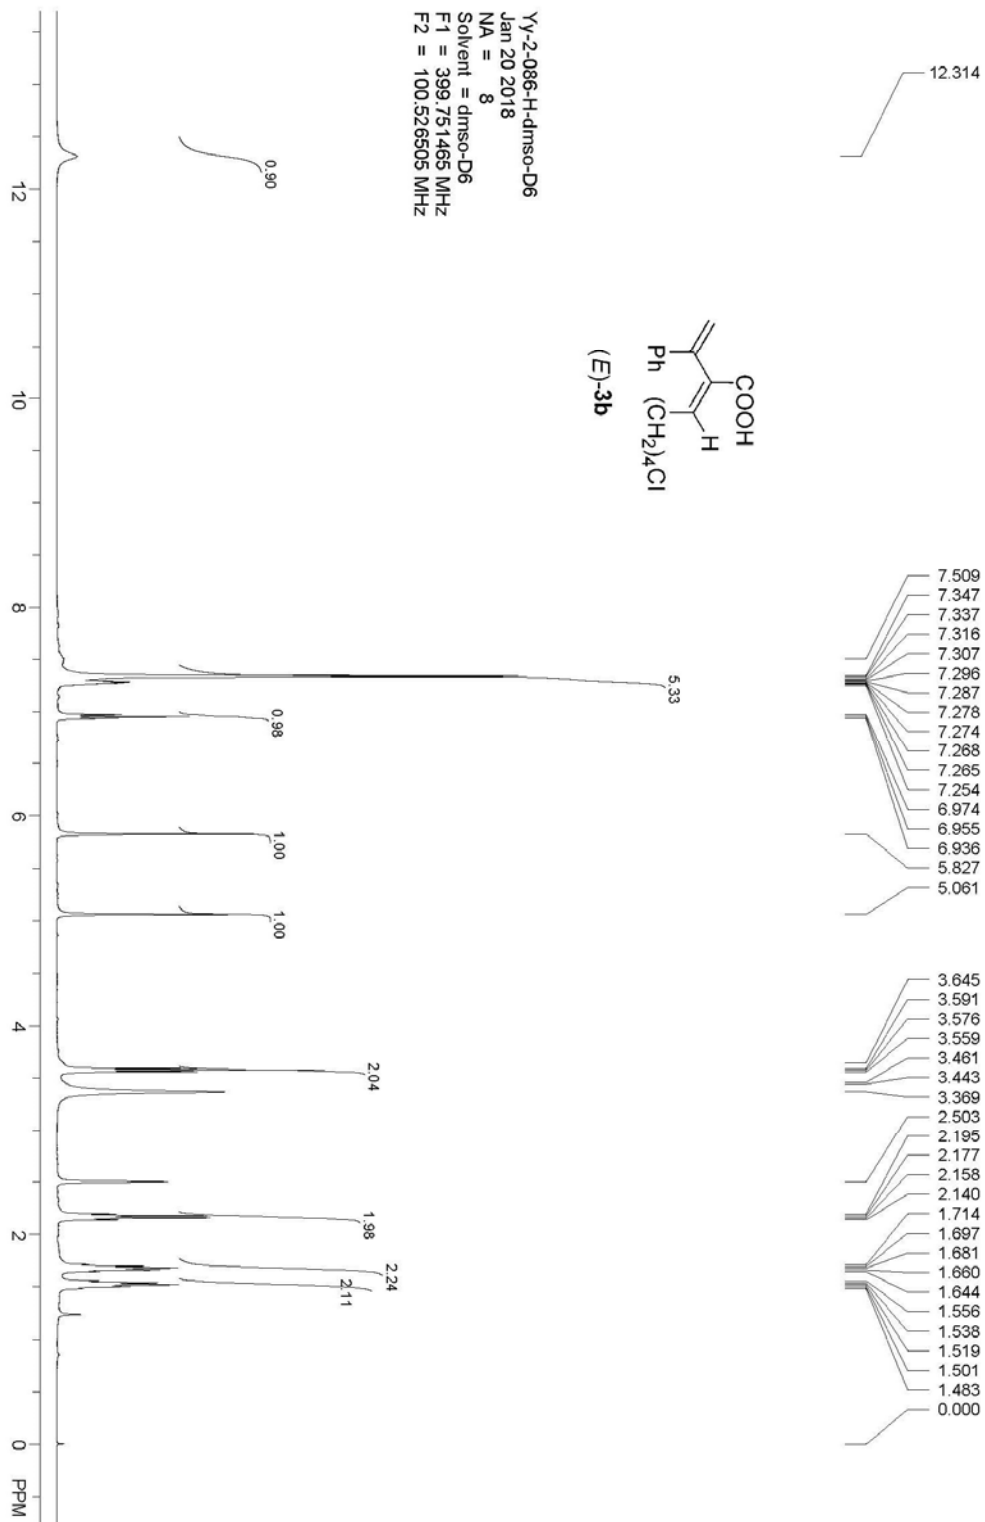

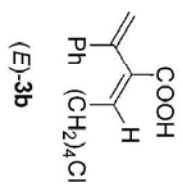

Yy-2-086-C  
 Jan 4 2018  
 NA = 512  
 Solvent = cdcl3  
 F1 = 100.527557 MHz  
 F2 = 399.749146 MHz

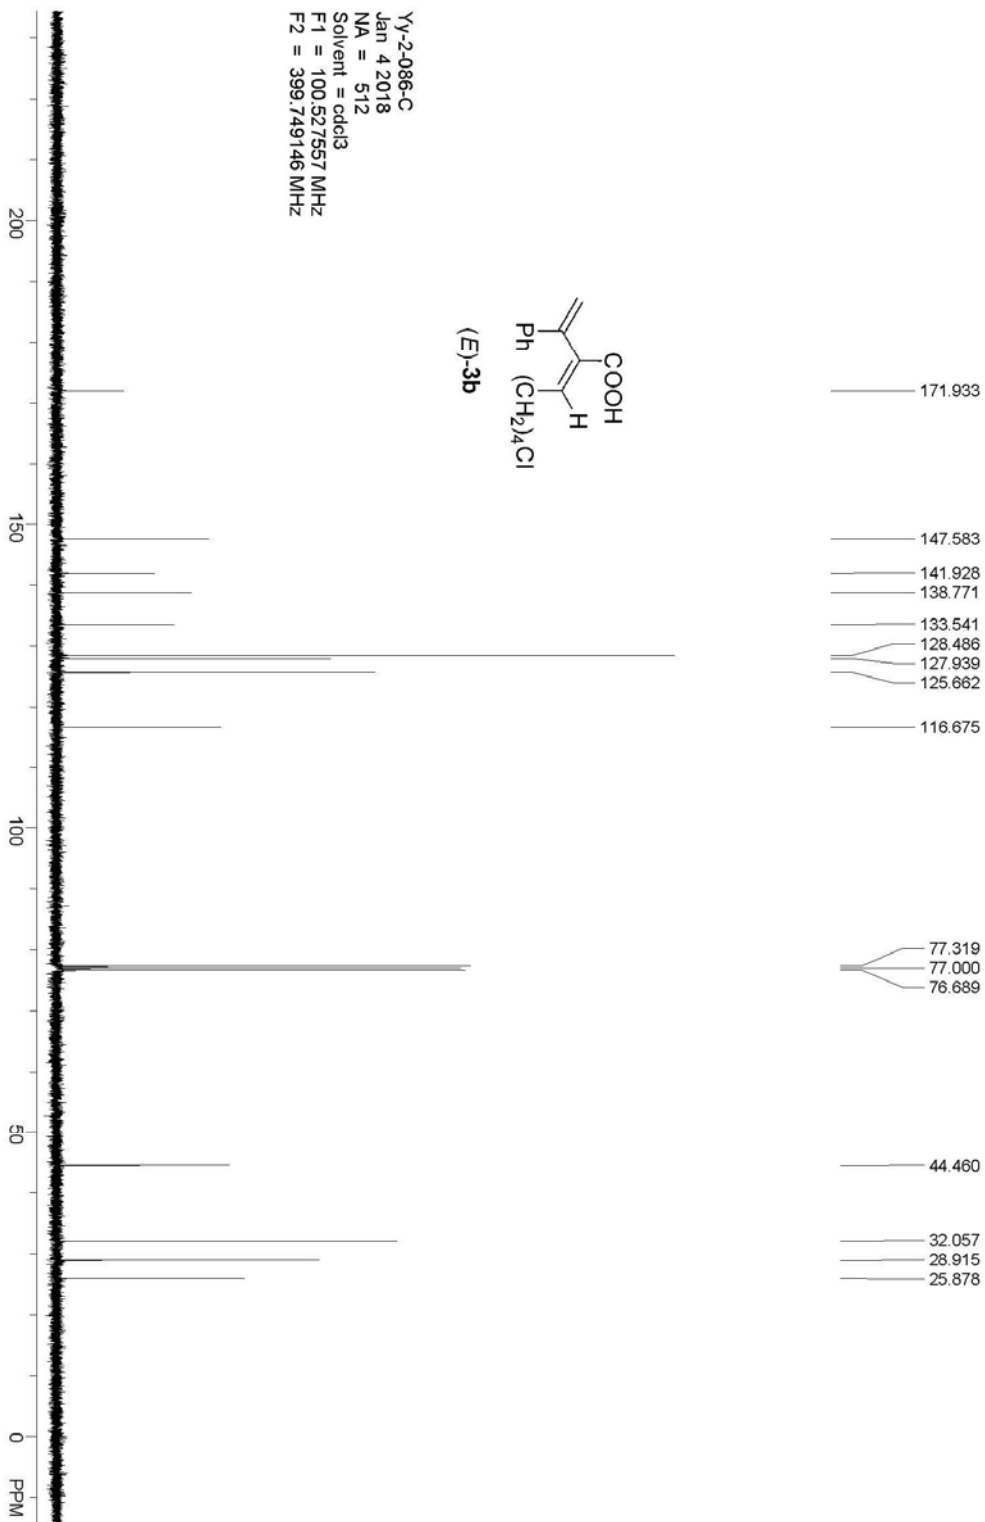

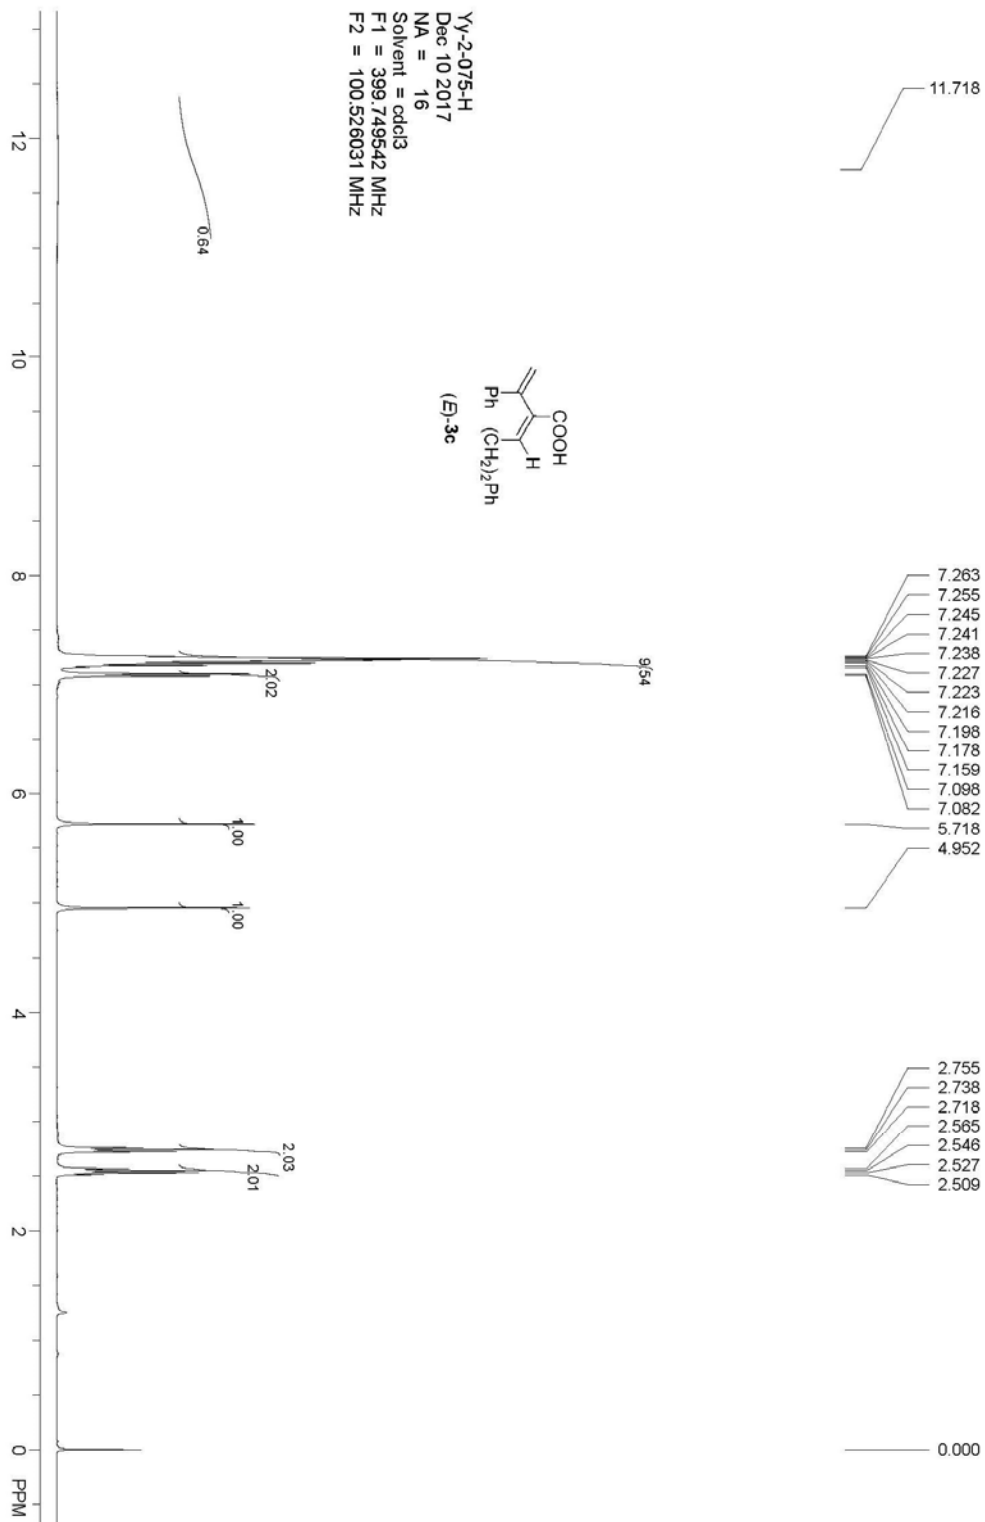

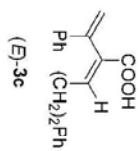

Yy-2-075-C  
 Dec 10 2017  
 NA = 512  
 Solvent = cdcl3  
 F1 = 100.527557 MHz  
 F2 = 399.749146 MHz

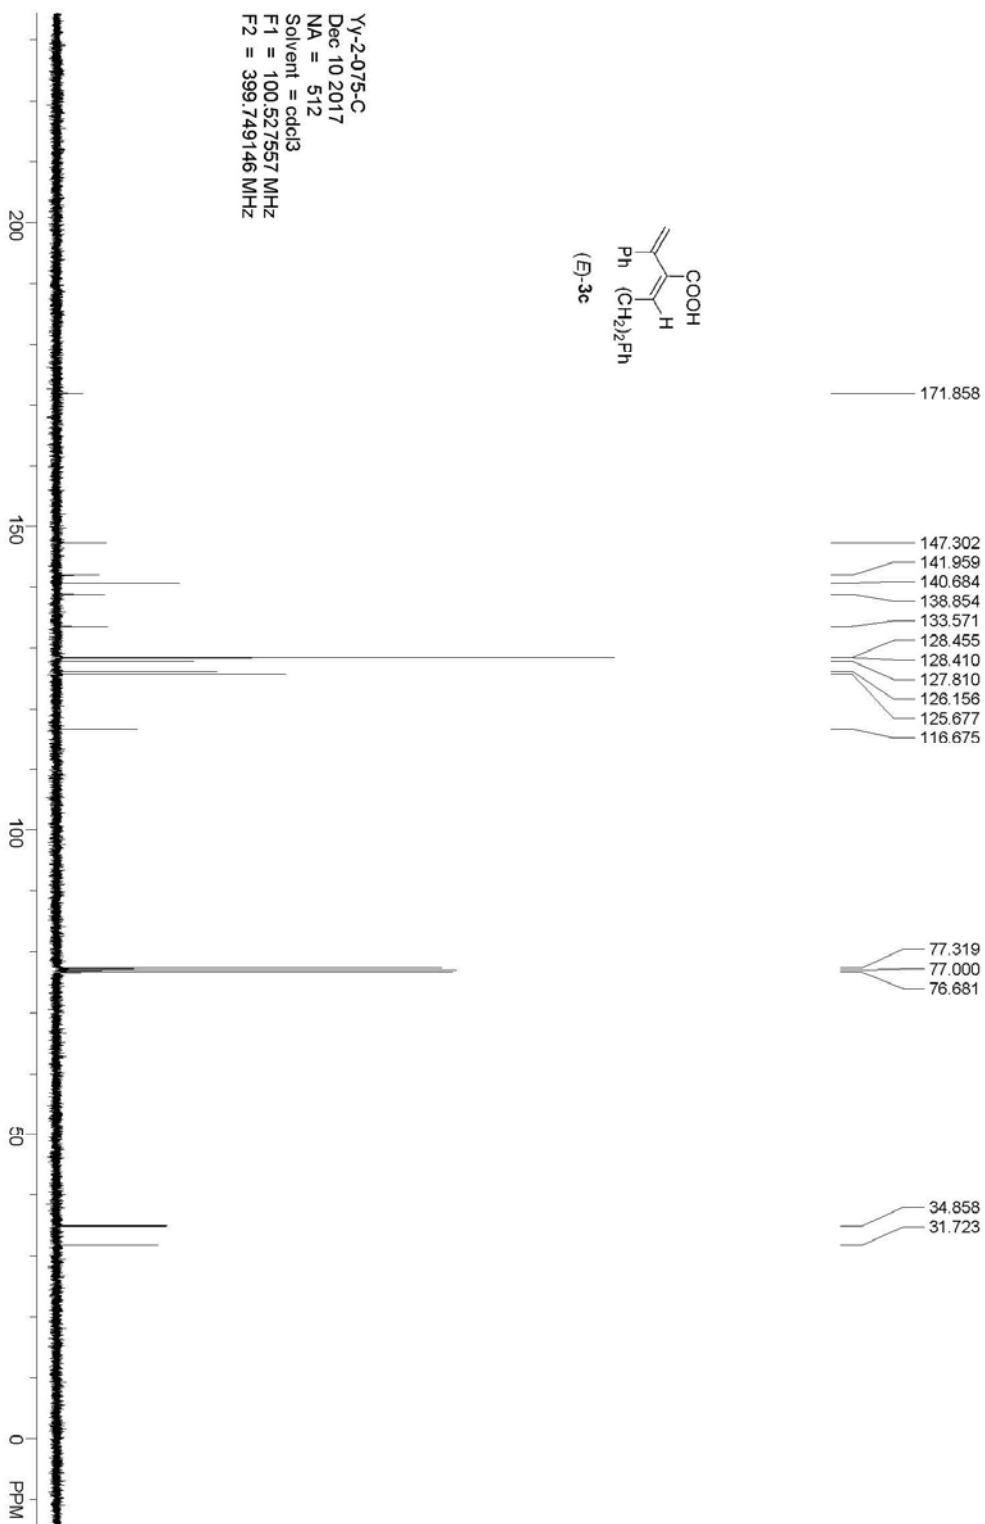

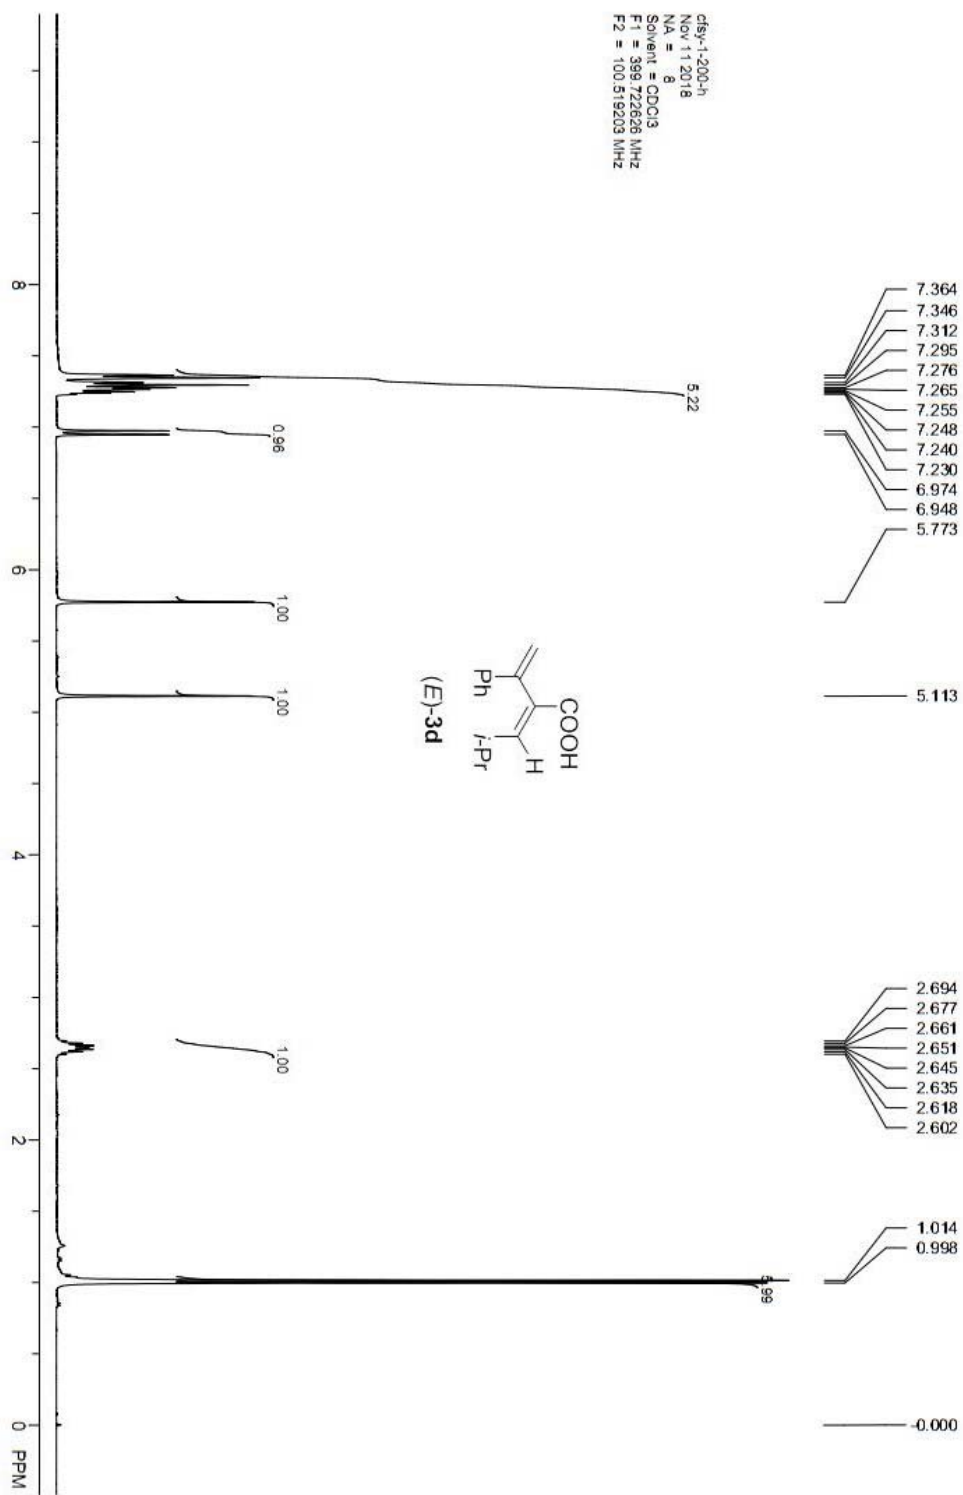

clsq-1200-c  
Nov 11 2018  
NA = 84  
Solvent = cdcl3  
F1 = 100.597885 MHz  
F2 = 400.030792 MHz

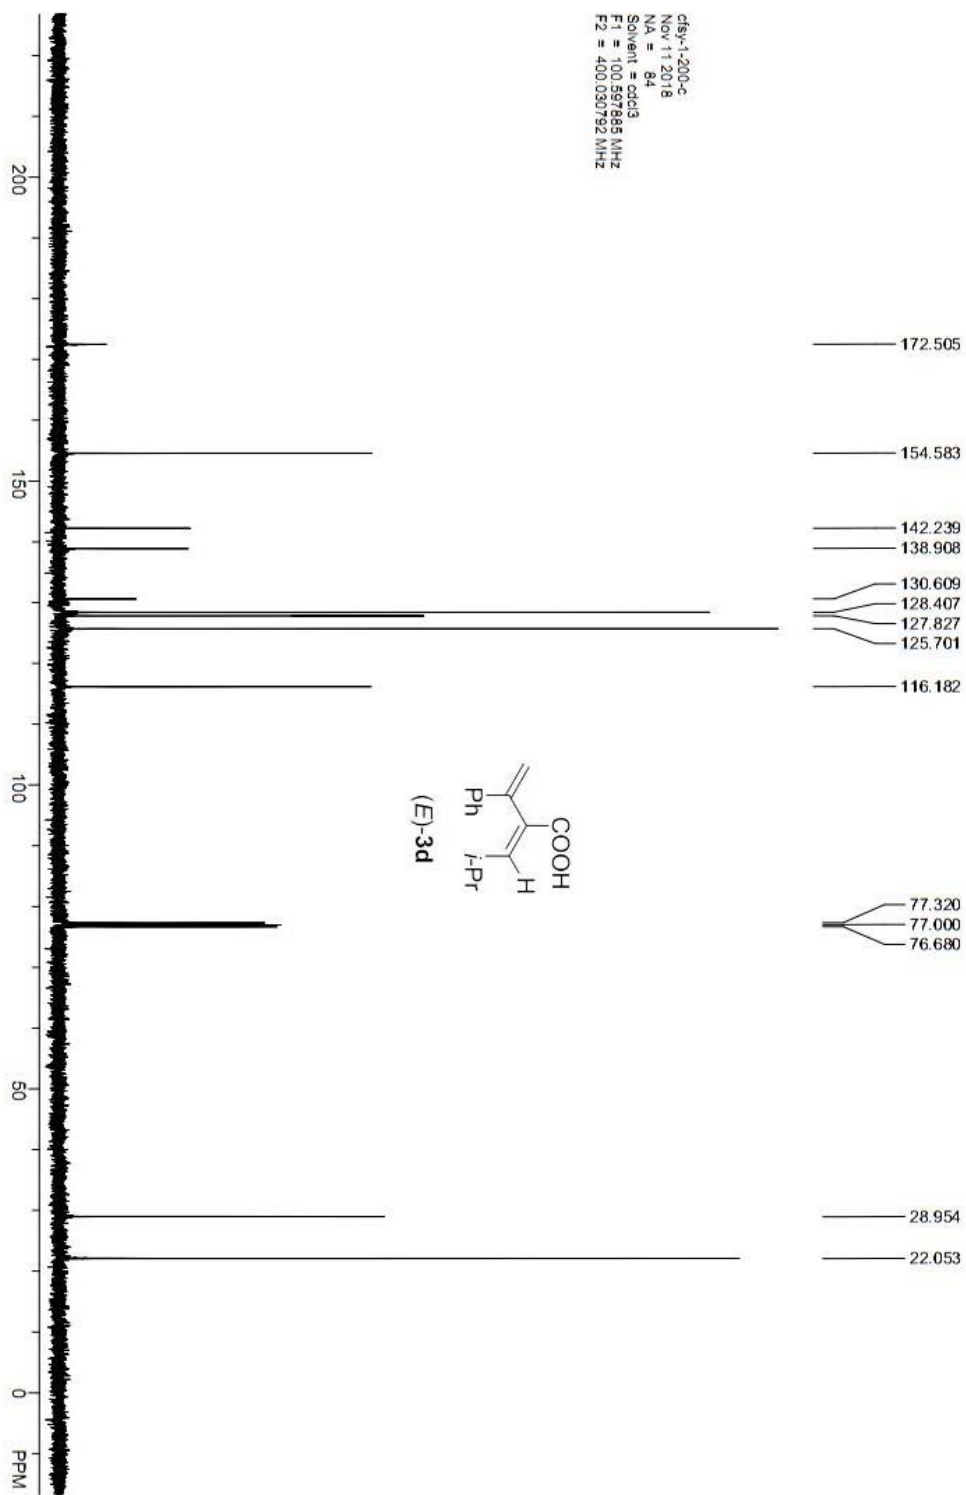

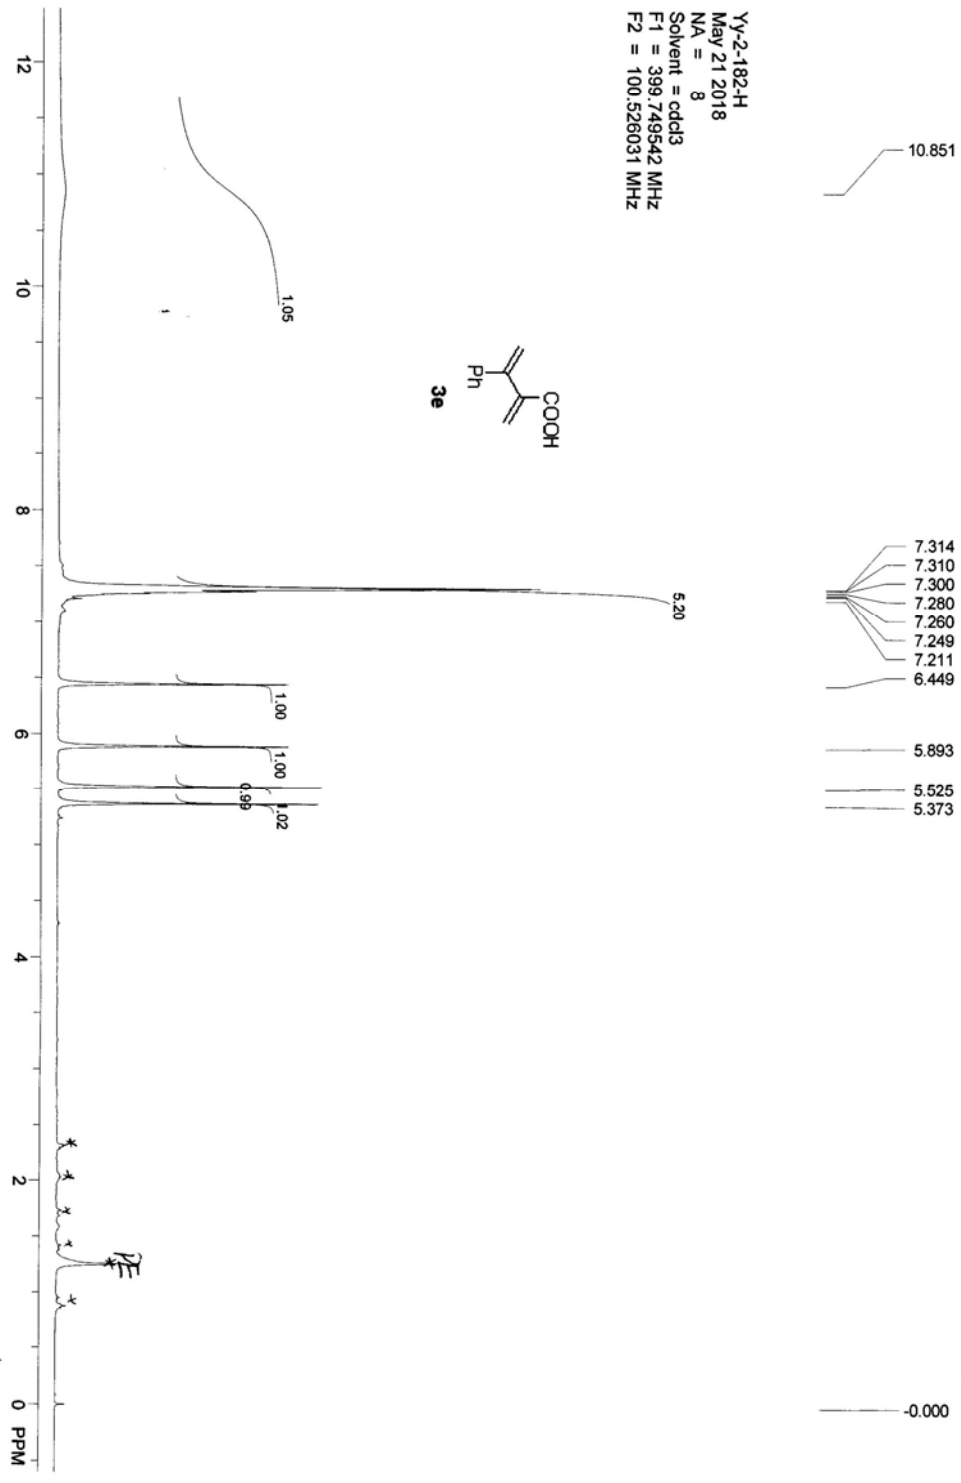



YY-2-182-C  
May 21 2018  
NA = 128  
Solvent = cdcl3  
F1 = 100.527557 MHz  
F2 = 399.749146 MHz

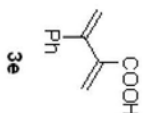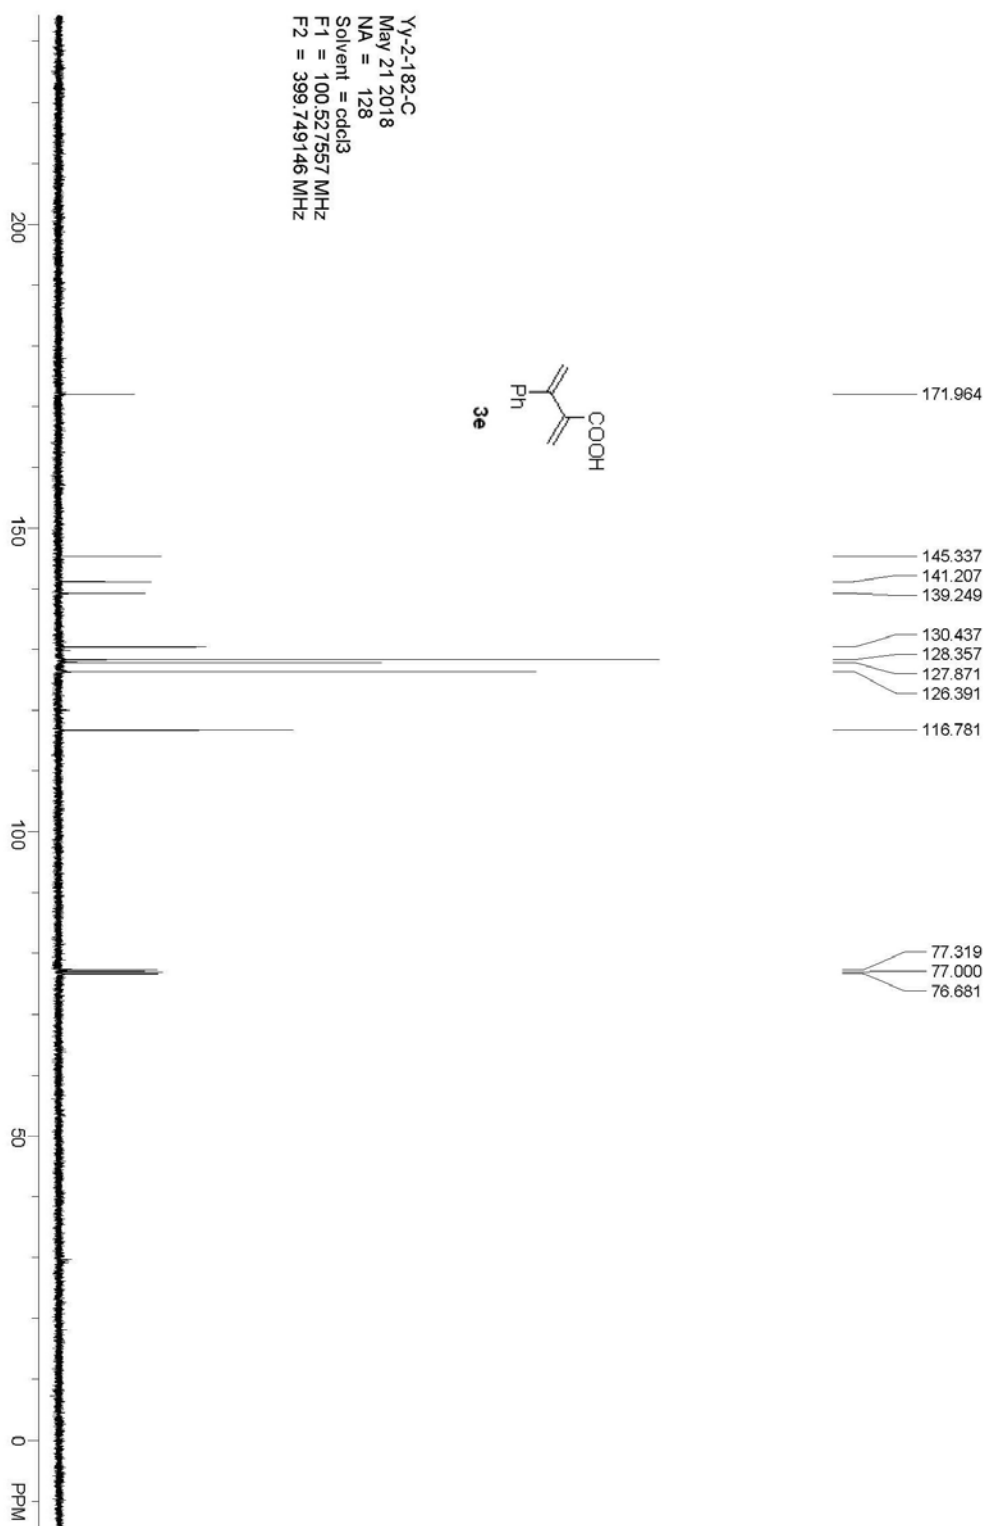

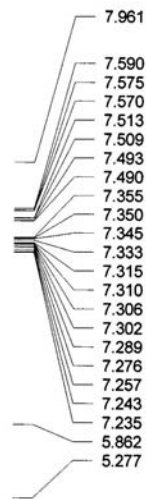

Yy-2-029-H  
Oct 15 2017  
NA = 4  
Solvent = cdcl3  
F1 = 399.749542 MHz  
F2 = 100.526031 MHz

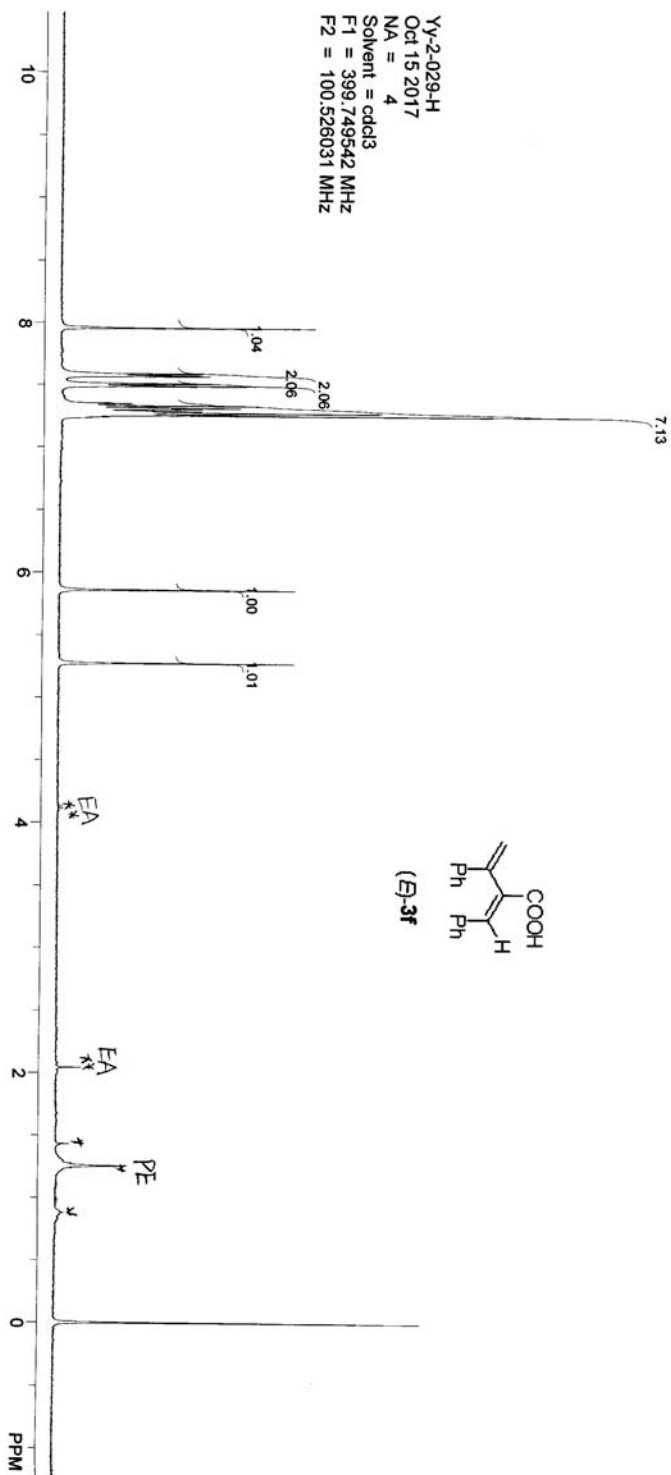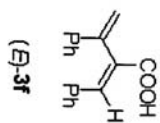

YJ-2-029-C-acetone-D6  
Nov 30 2017  
NA = 1000  
Solvent = acetone-D6  
F1 = 100.528084 MHz  
F2 = 399.751221 MHz

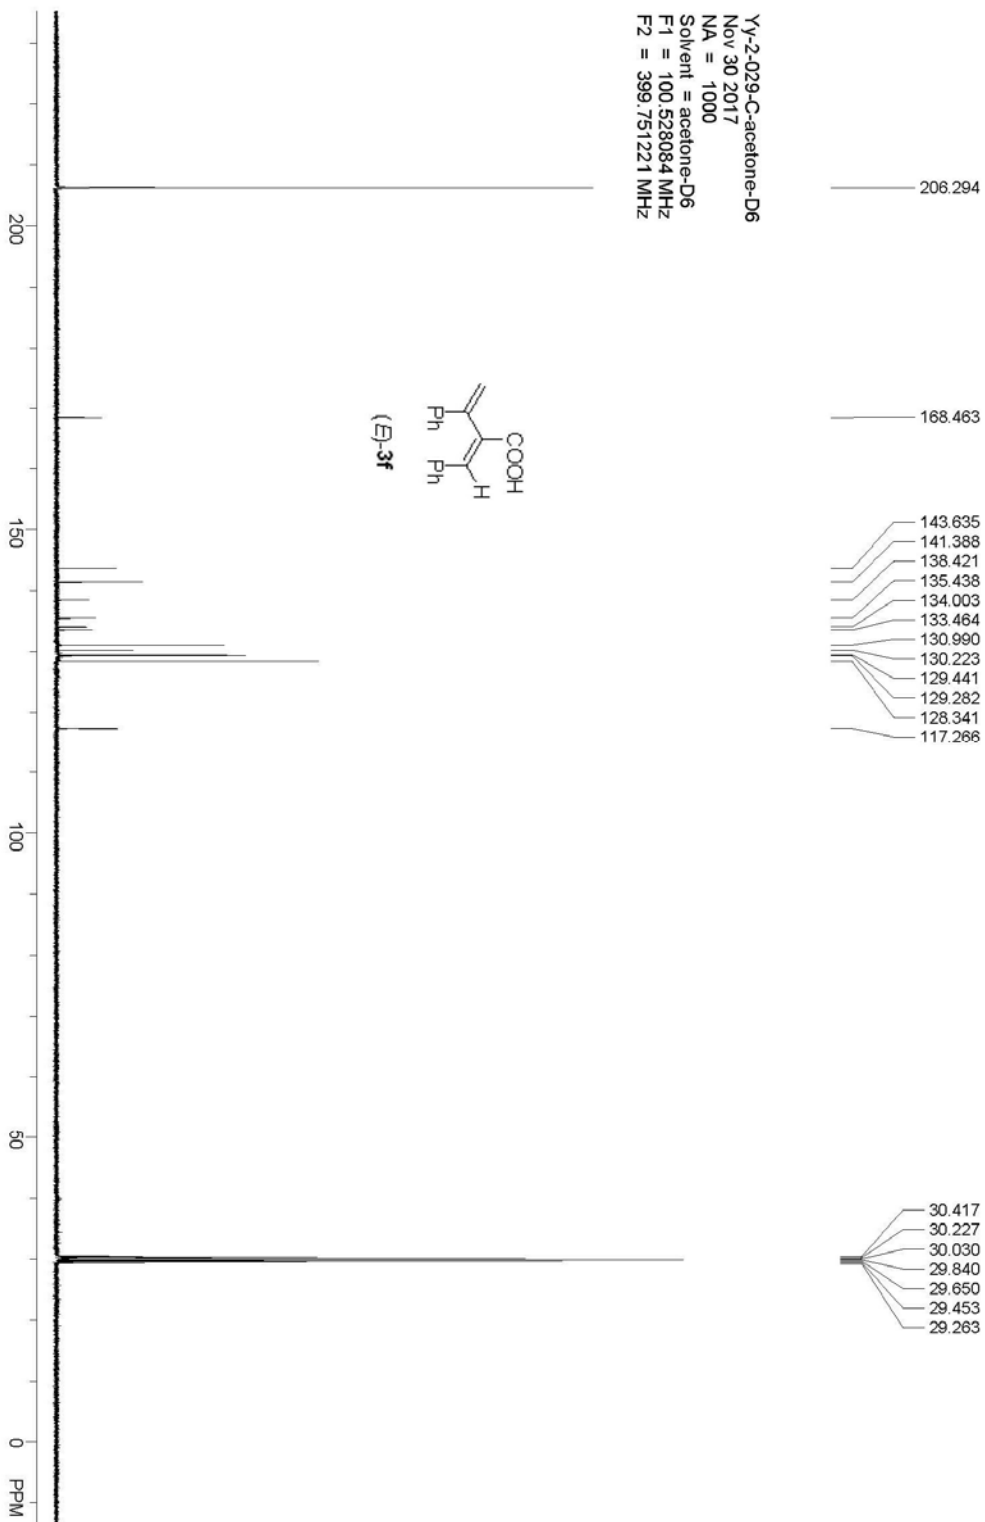

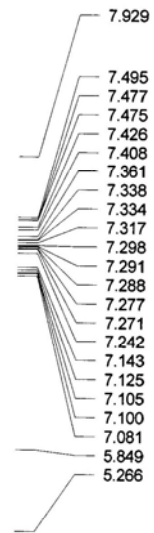

Yy-2-085-H  
Jan 3 2018  
NA = 8  
Solvent = cdd3  
F1 = 399.749542 MHz  
F2 = 100.526031 MHz

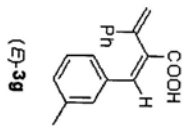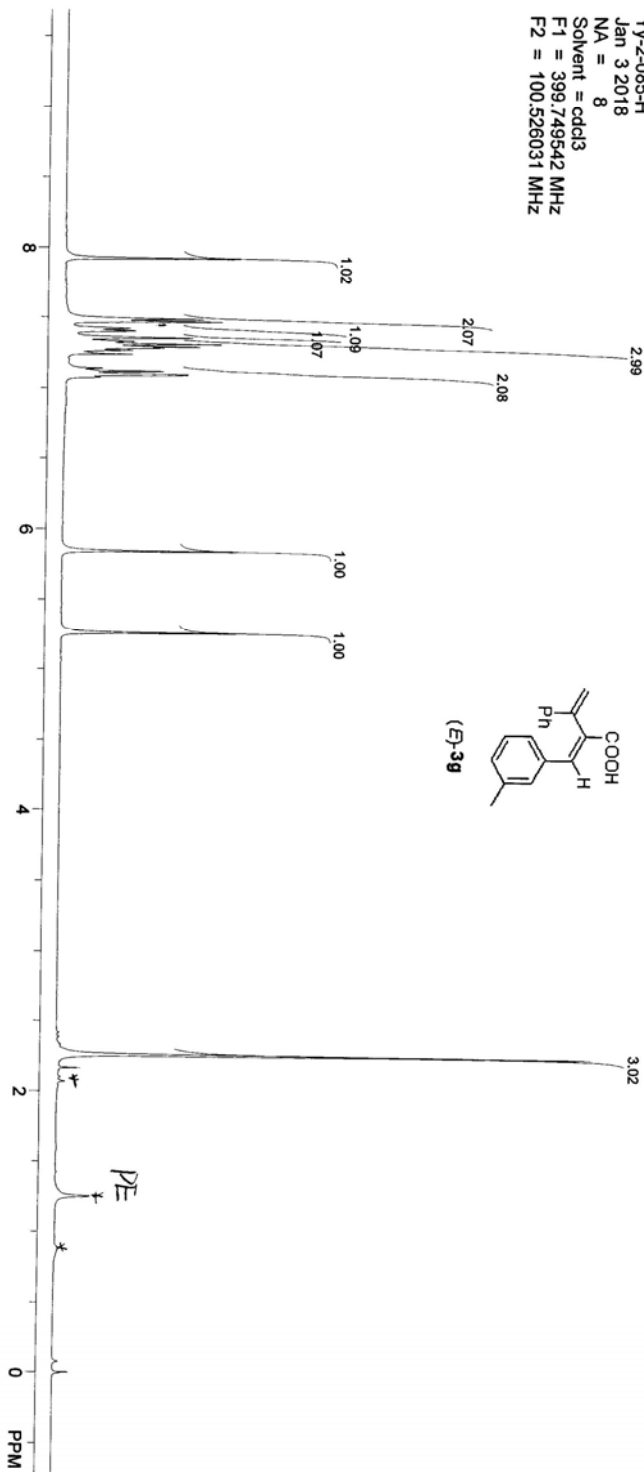

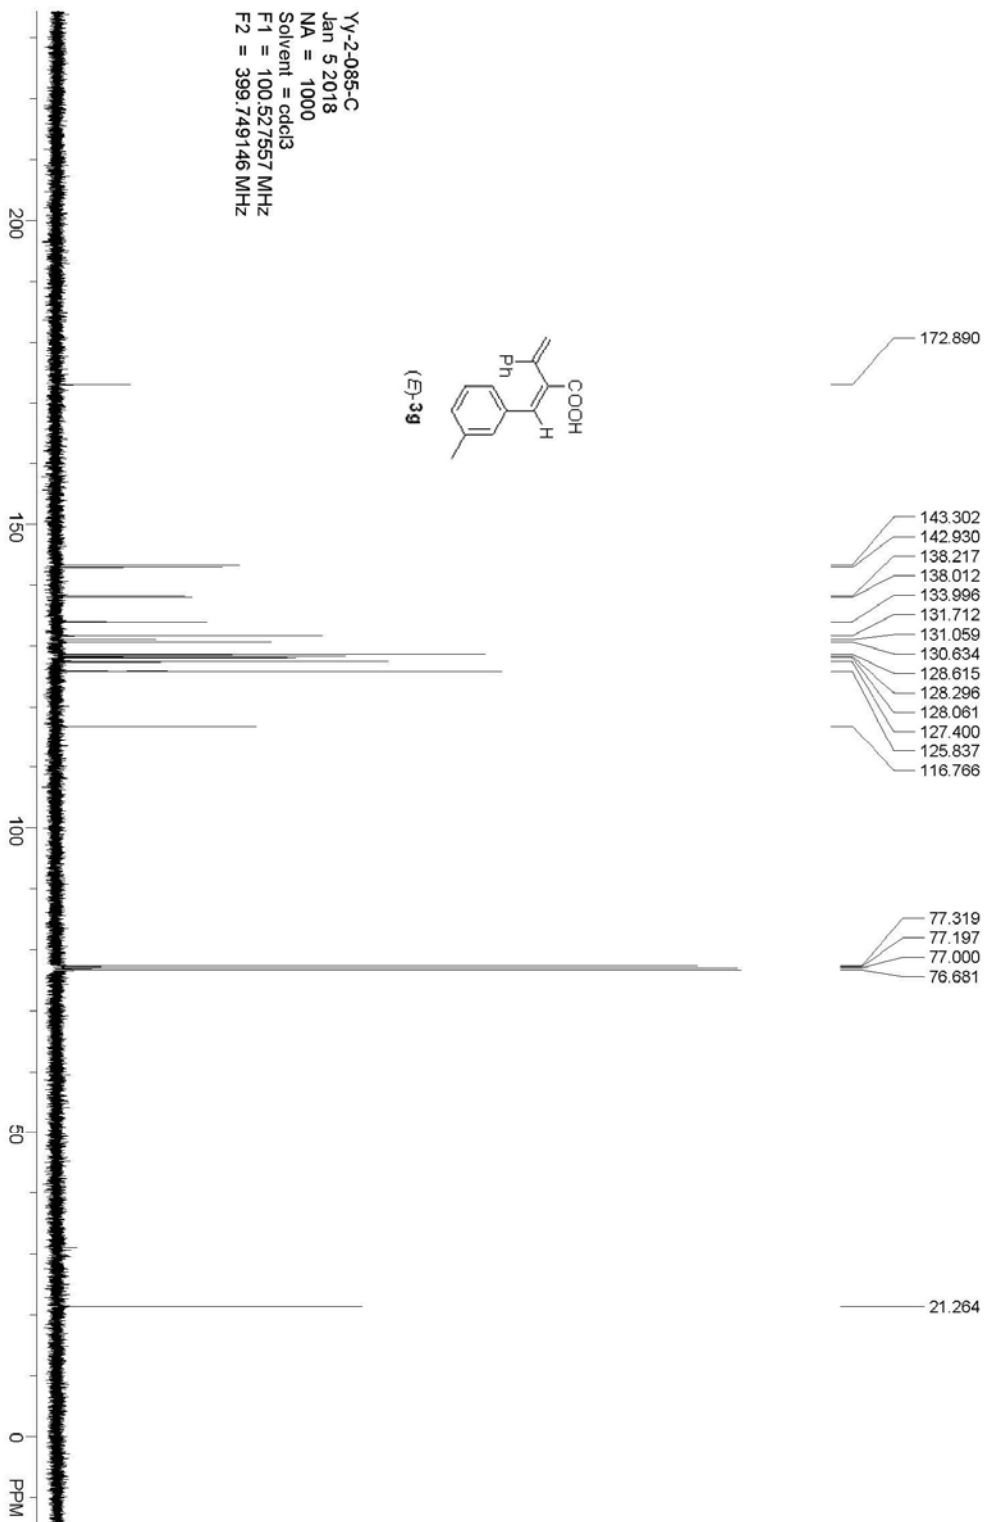

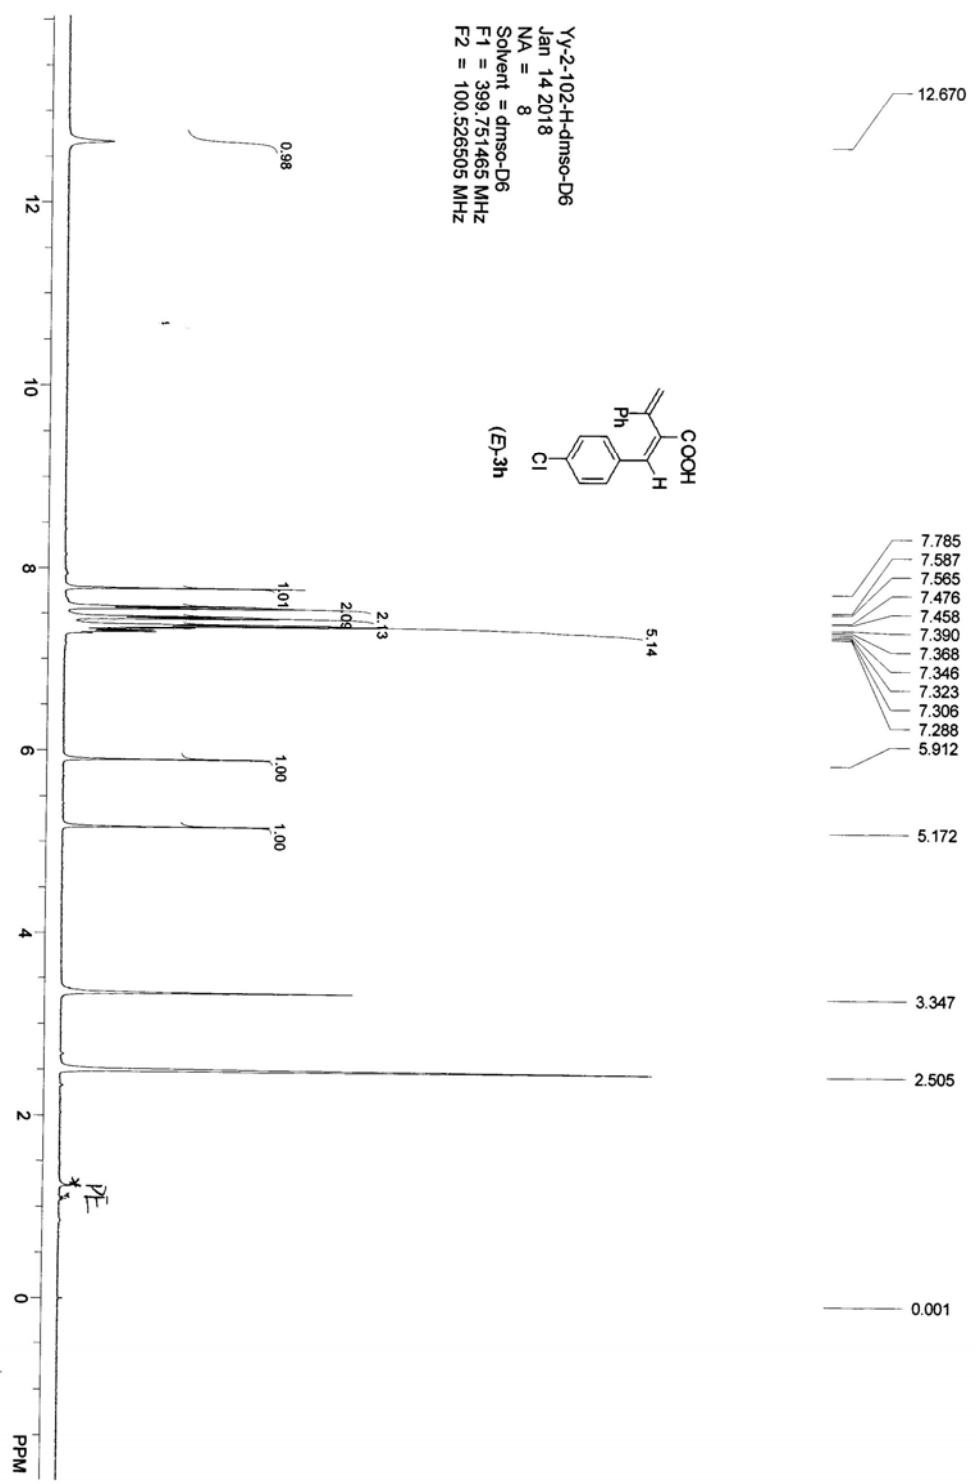

YY-2-102-C  
Jan 12 2018  
NA = 256  
Solvent = cdcl3  
F1 = 100.527557 MHz  
F2 = 399.749146 MHz

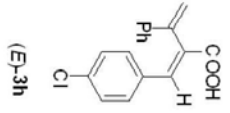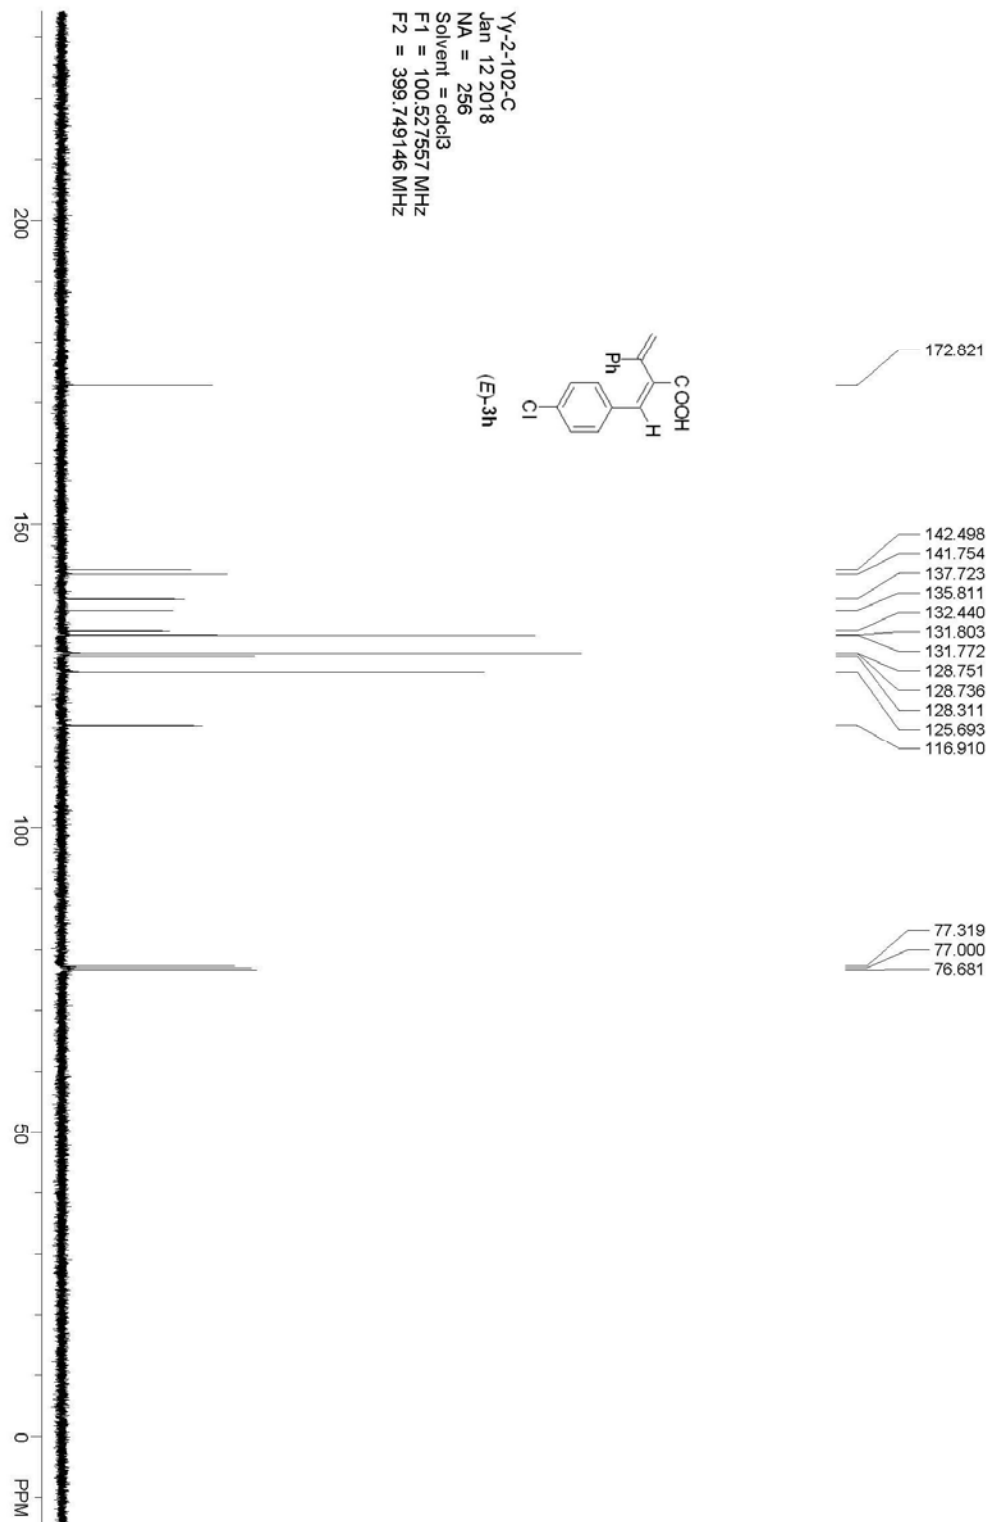

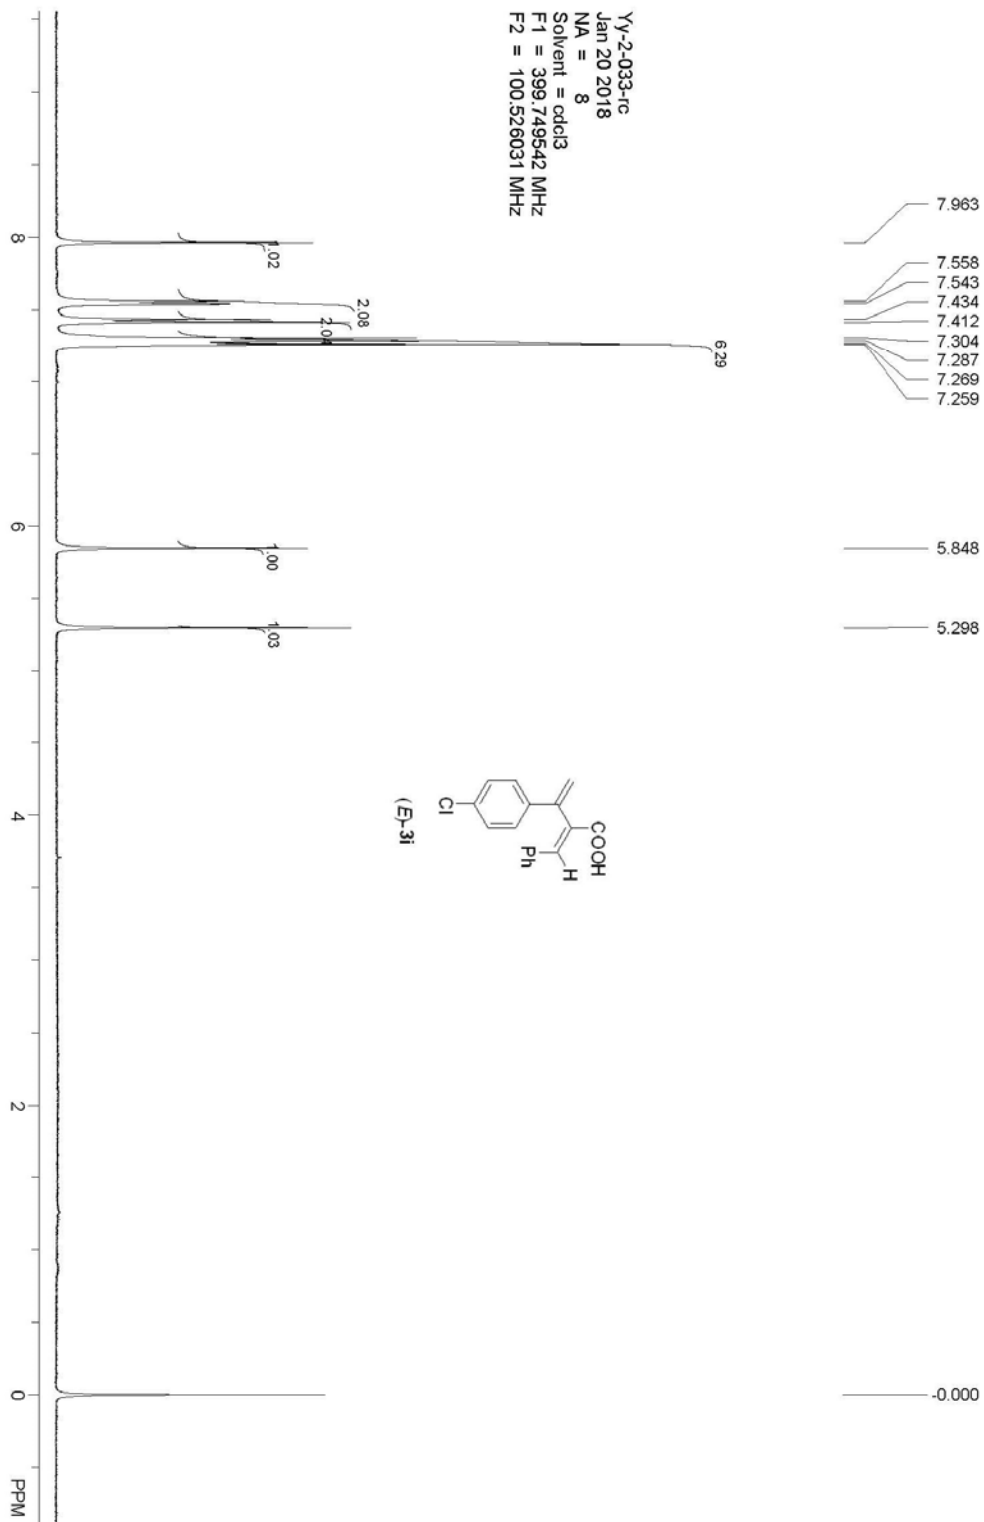



YY-2-033-rc-C  
Jan 22 2018  
NA = 1000  
Solvent = dmso-D6  
F1 = 100.528038 MHz  
F2 = 399.751038 MHz

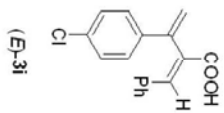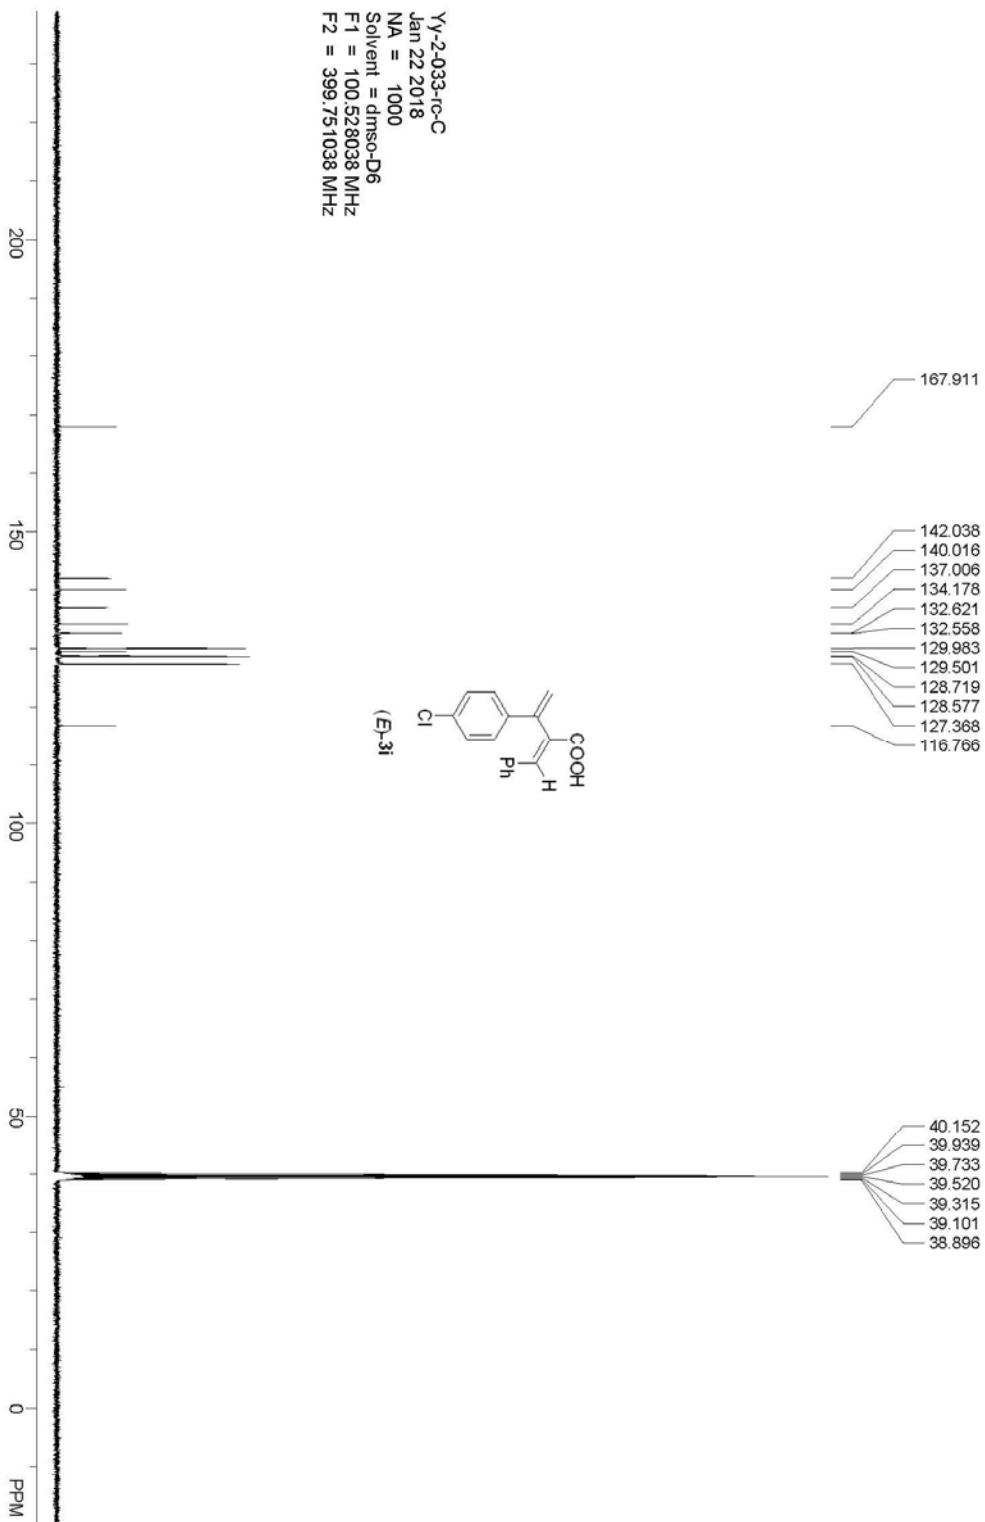

7.288  
7.268  
7.256  
7.216  
7.196  
7.178

YY-2-103-H  
Jan 21 2018  
NA = 8  
Solvent = cdcl3  
F1 = 399.749542 MHz  
F2 = 100.526031 MHz

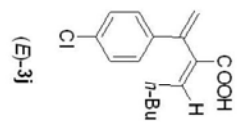

2.234  
2.215  
2.196  
2.177

1.447  
1.429  
1.409  
1.392  
1.373  
1.342  
1.324  
1.306  
1.287  
1.269  
1.252  
0.876  
0.857  
0.840  
-0.000

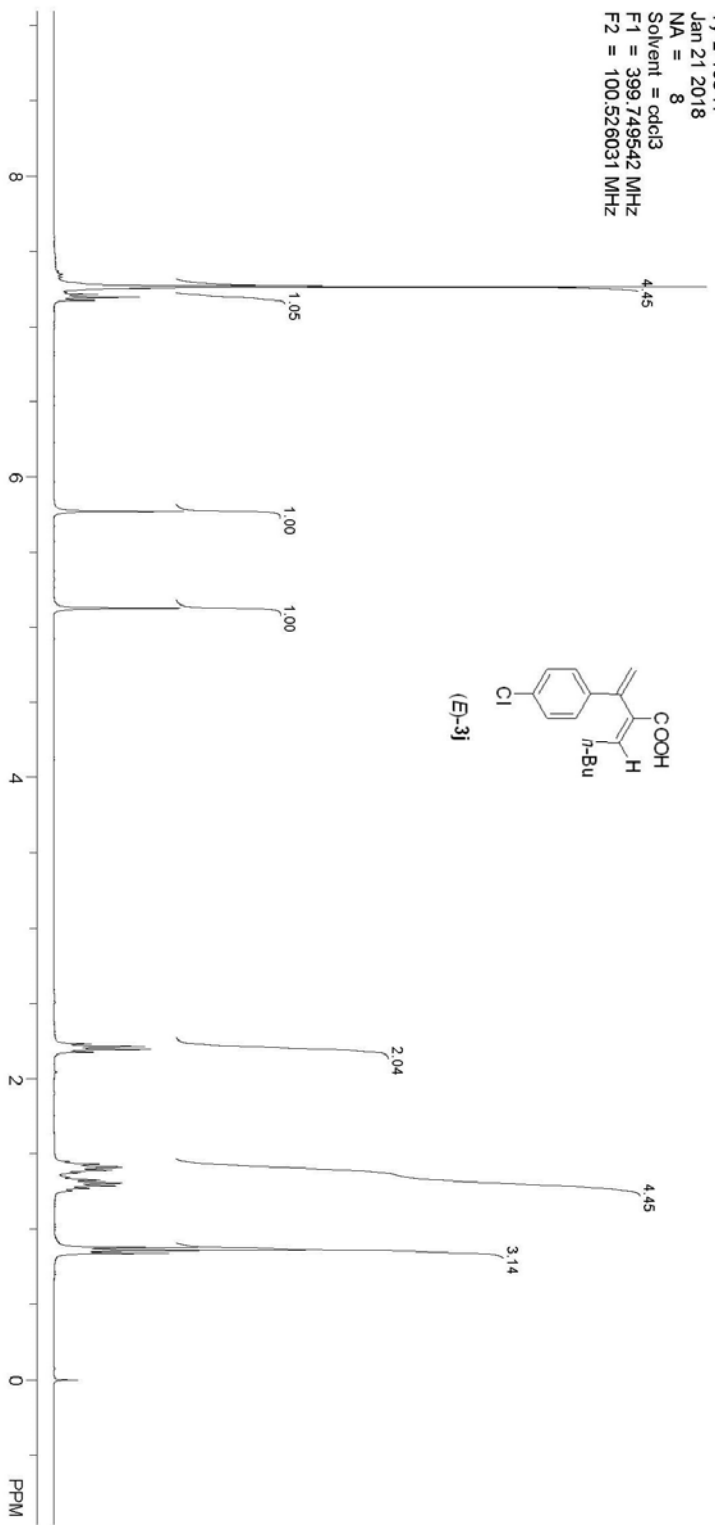

Yy-2-103-C  
Jan 21 2018  
NA = 512  
Solvent = cdcl3  
F1 = 100.527557 MHz  
F2 = 399.749146 MHz

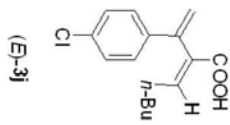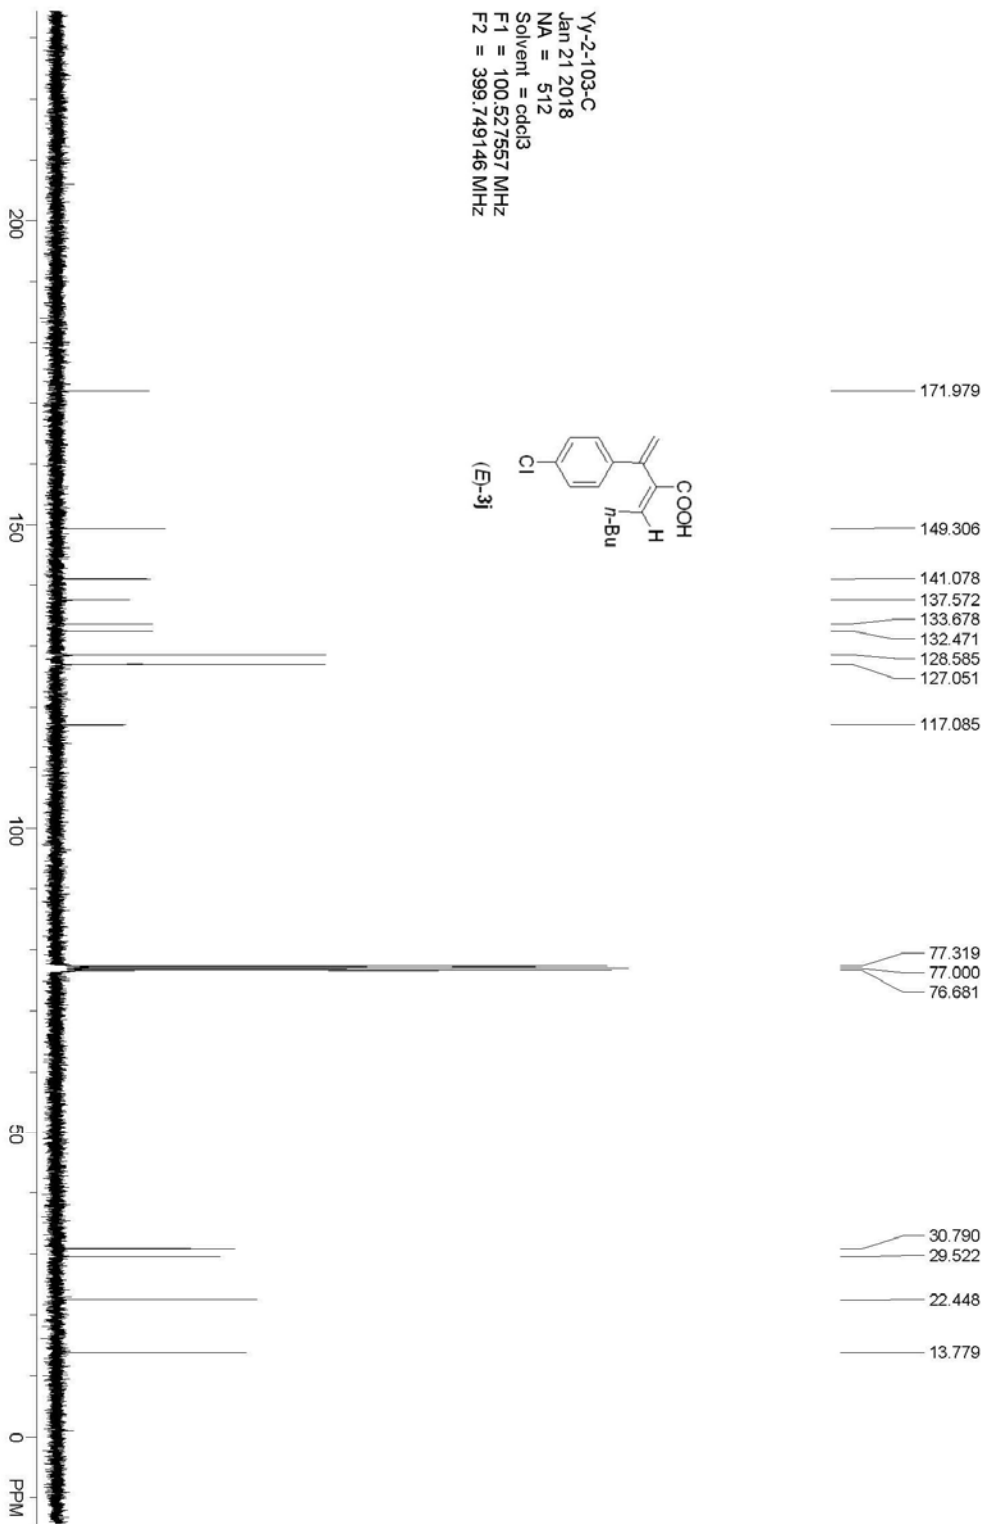

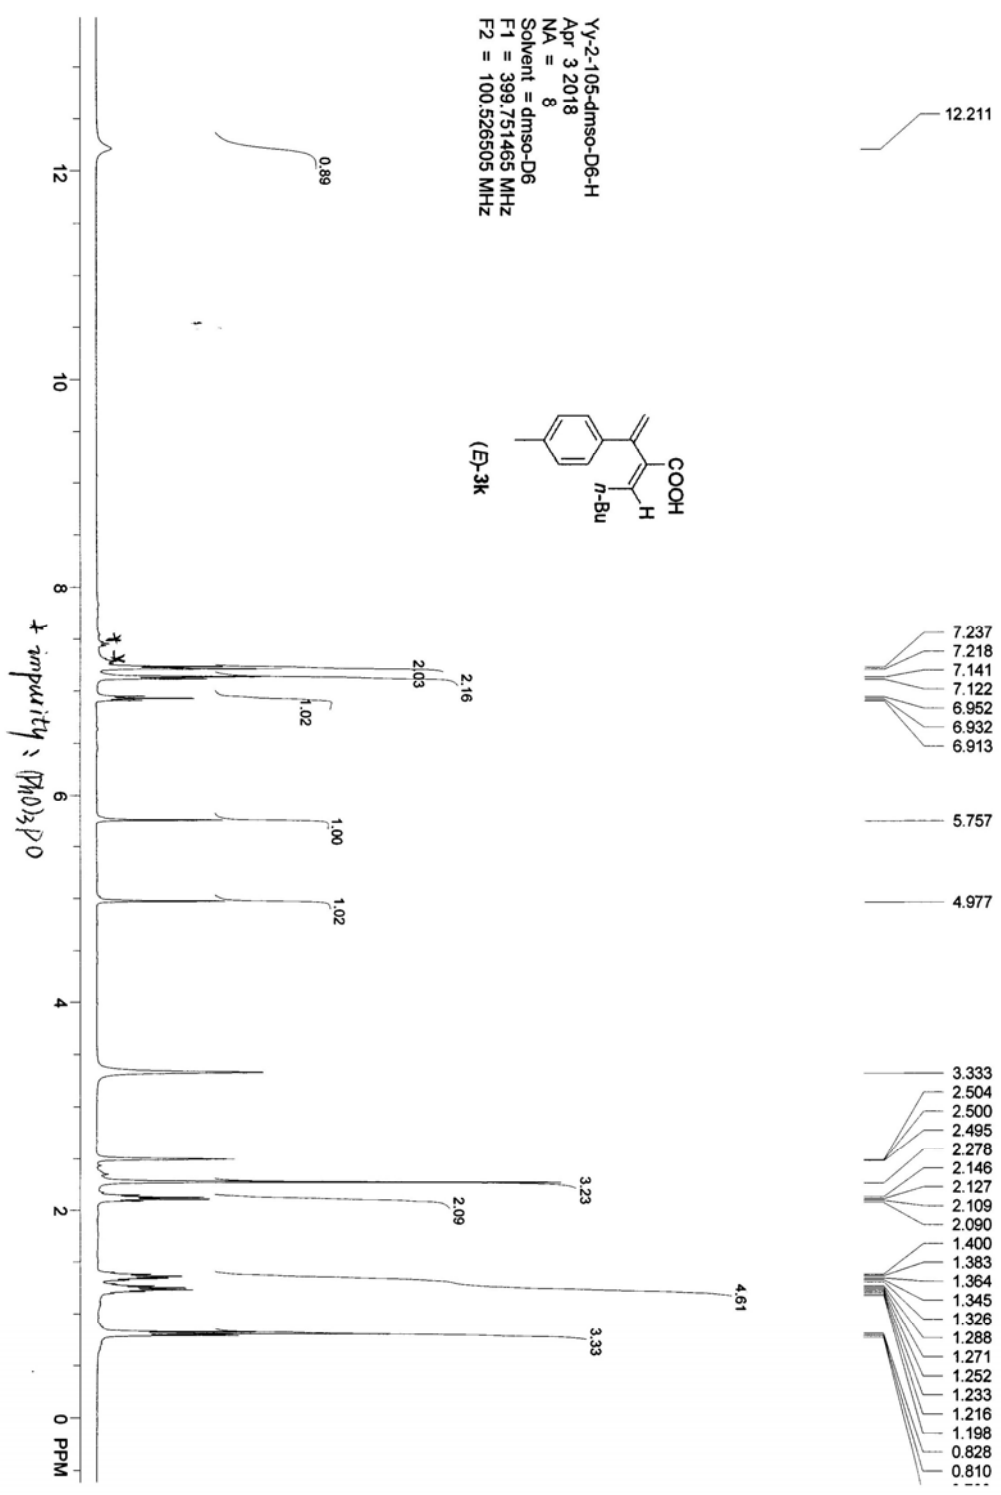

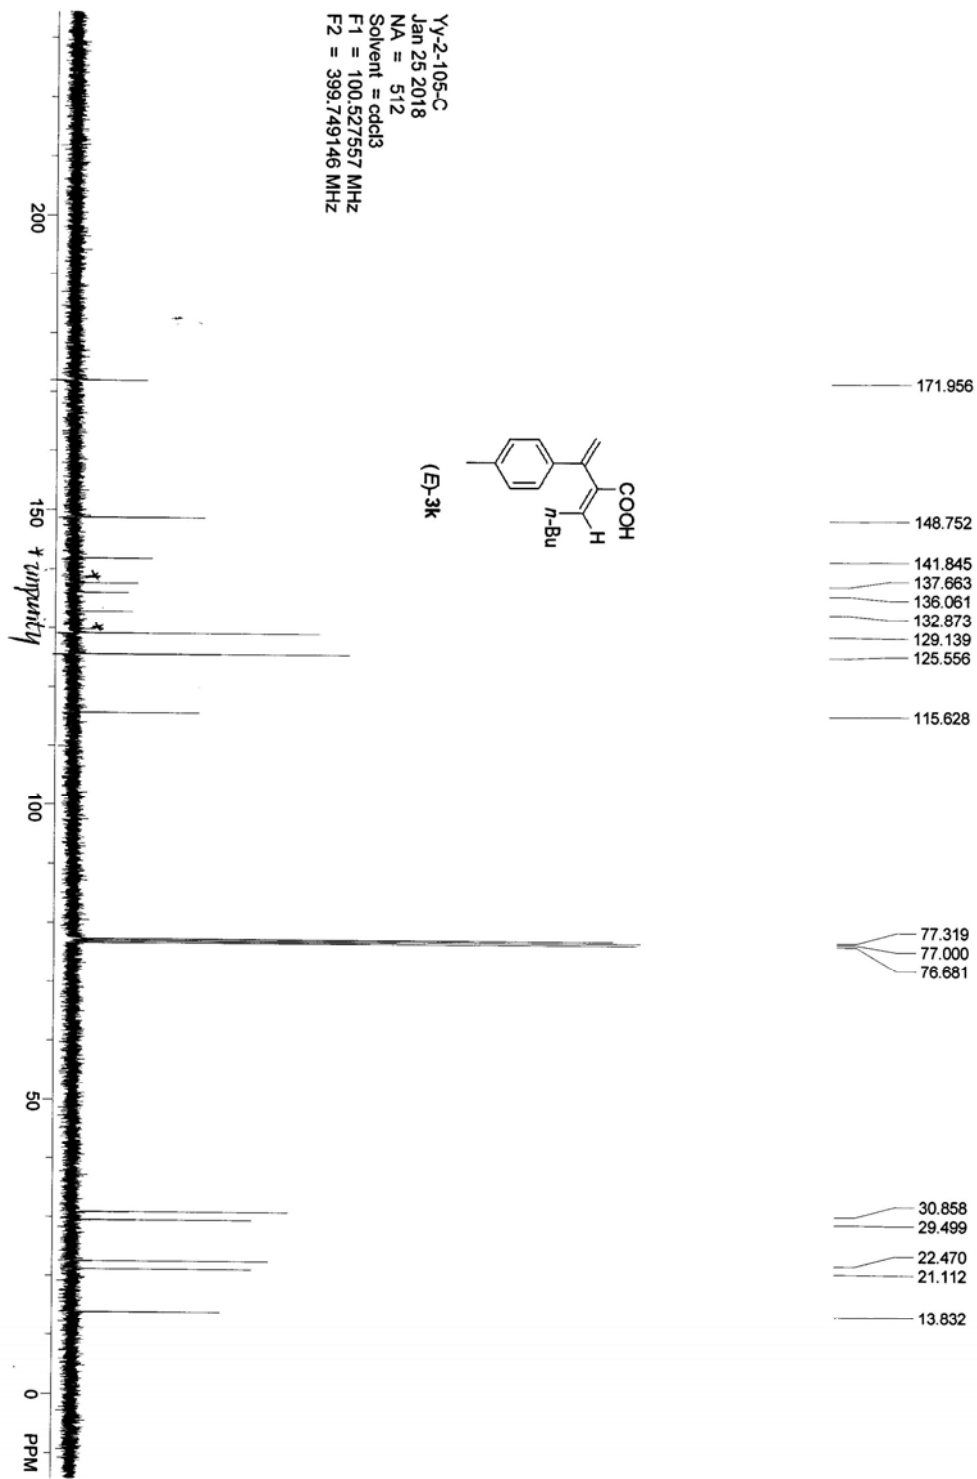

Yy-2-105-purity  
purity = 94%  
39.1 mg product with 17.5 uL dibromomethane  
May 25 2018  
NA = 4  
Solvent = CDCl3  
F1 = 400.130005 MHz  
F2 = 1.000000 MHz

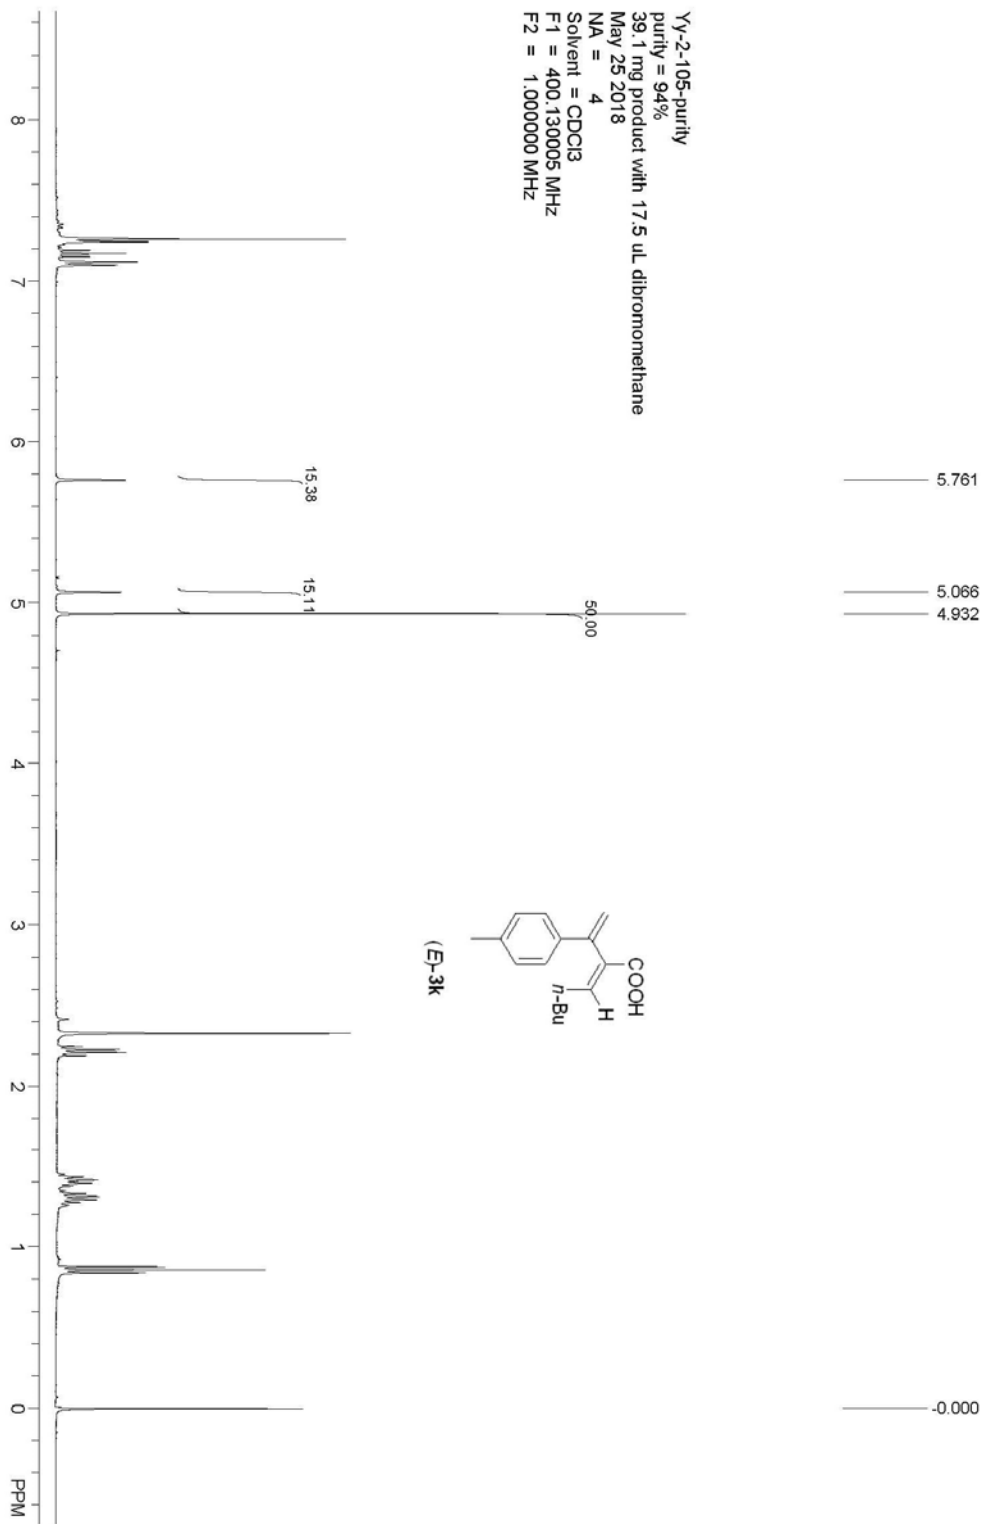

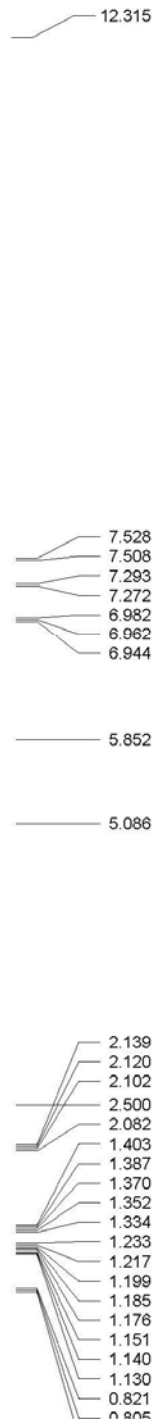

YY-2-022-H-dmso  
Nov 22 2017  
NA = 4  
Solvent = dmso-D6  
F1 = 399.751465 MHz  
F2 = 100.526505 MHz

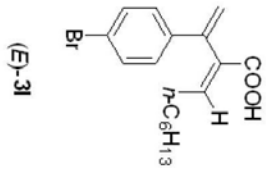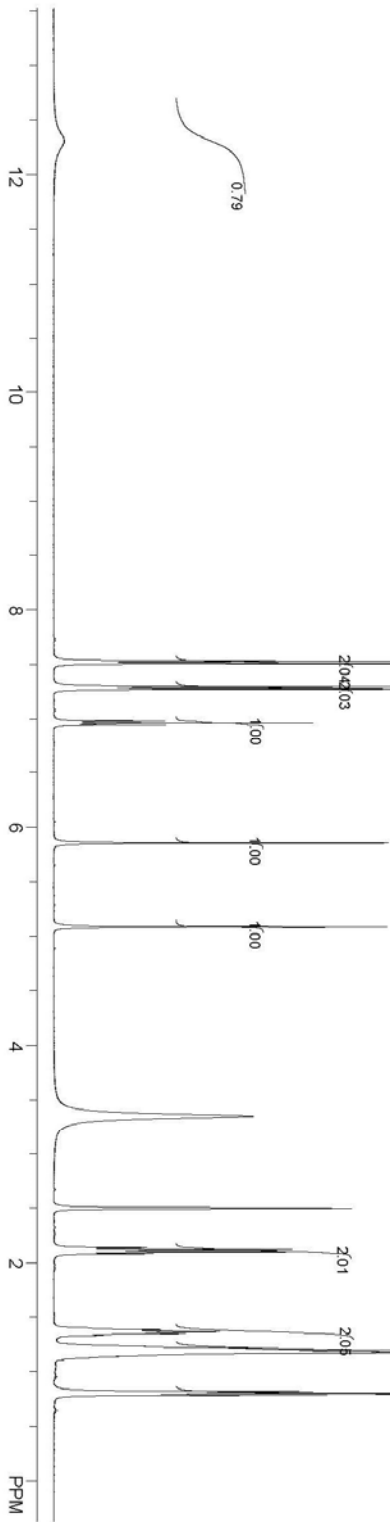

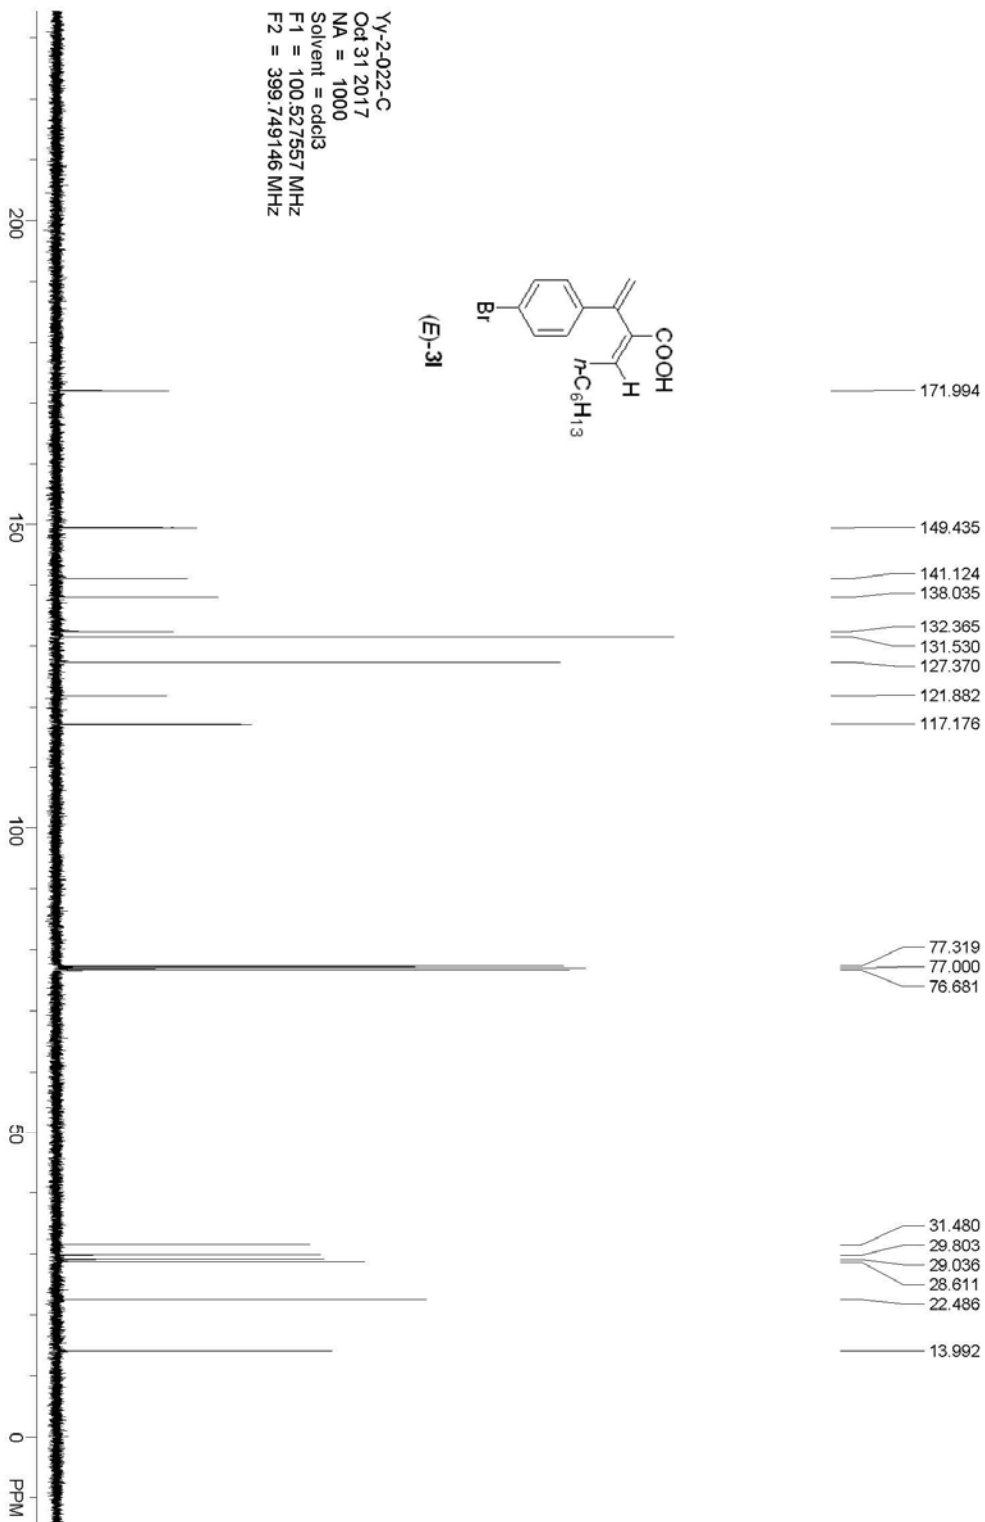



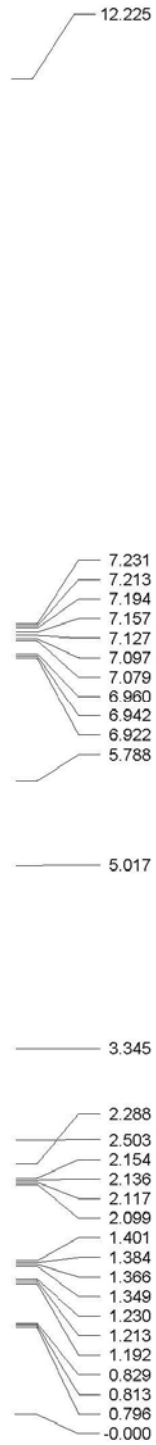

Yy-2-037-H-dmso-D6  
Jan 20 2018  
NA = 8  
Solvent = dmso-D6  
F1 = 399.751465 MHz  
F2 = 100.526505 MHz

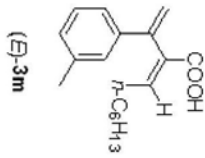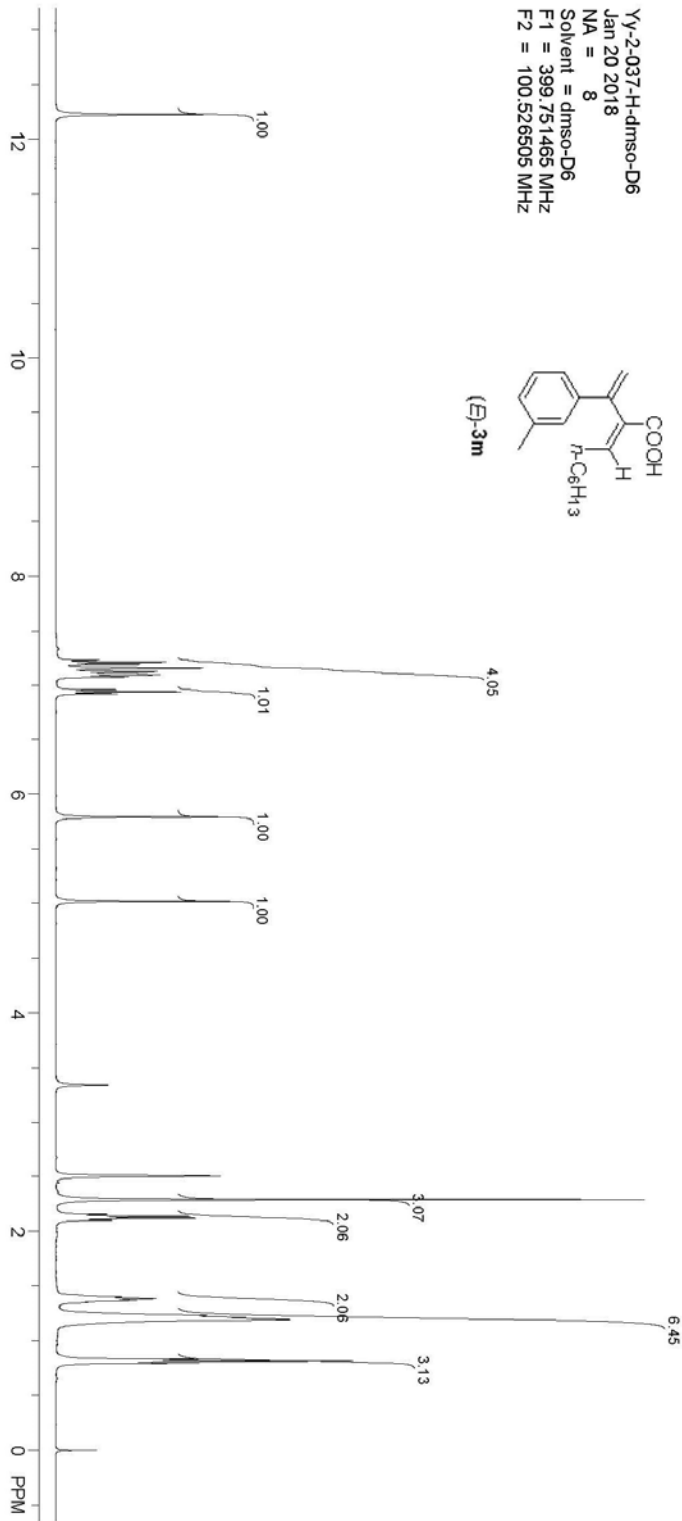

YY-2-037-C  
Oct 24 2017  
NA = 256  
Solvent = cdcl3  
F1 = 100.527557 MHz  
F2 = 399.749146 MHz

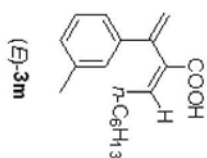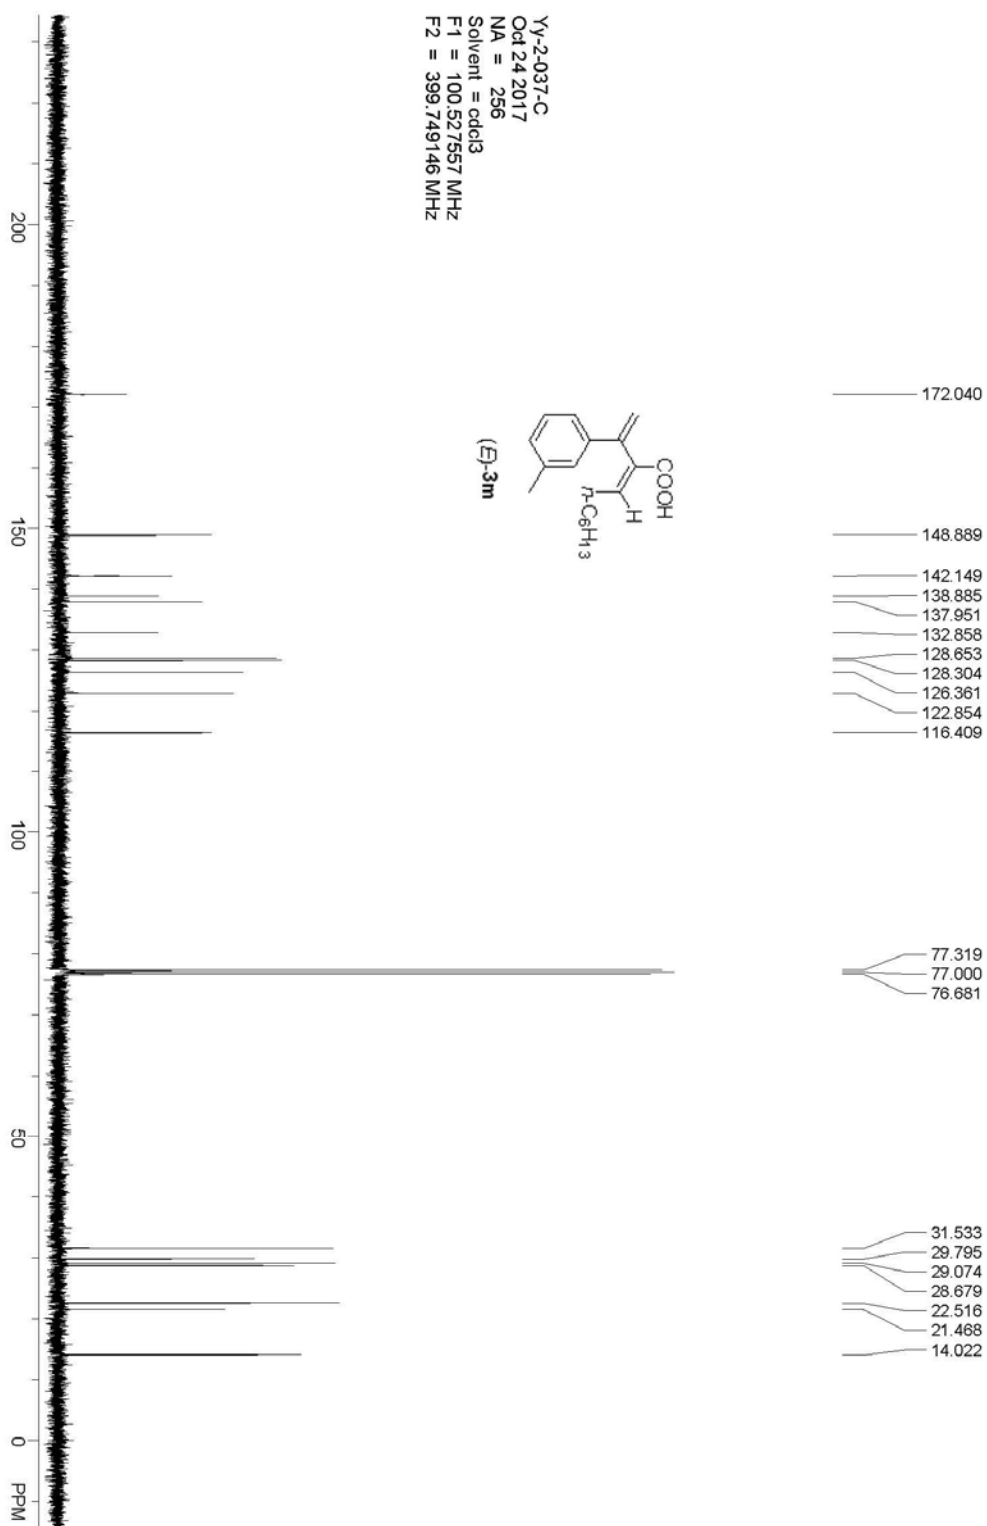

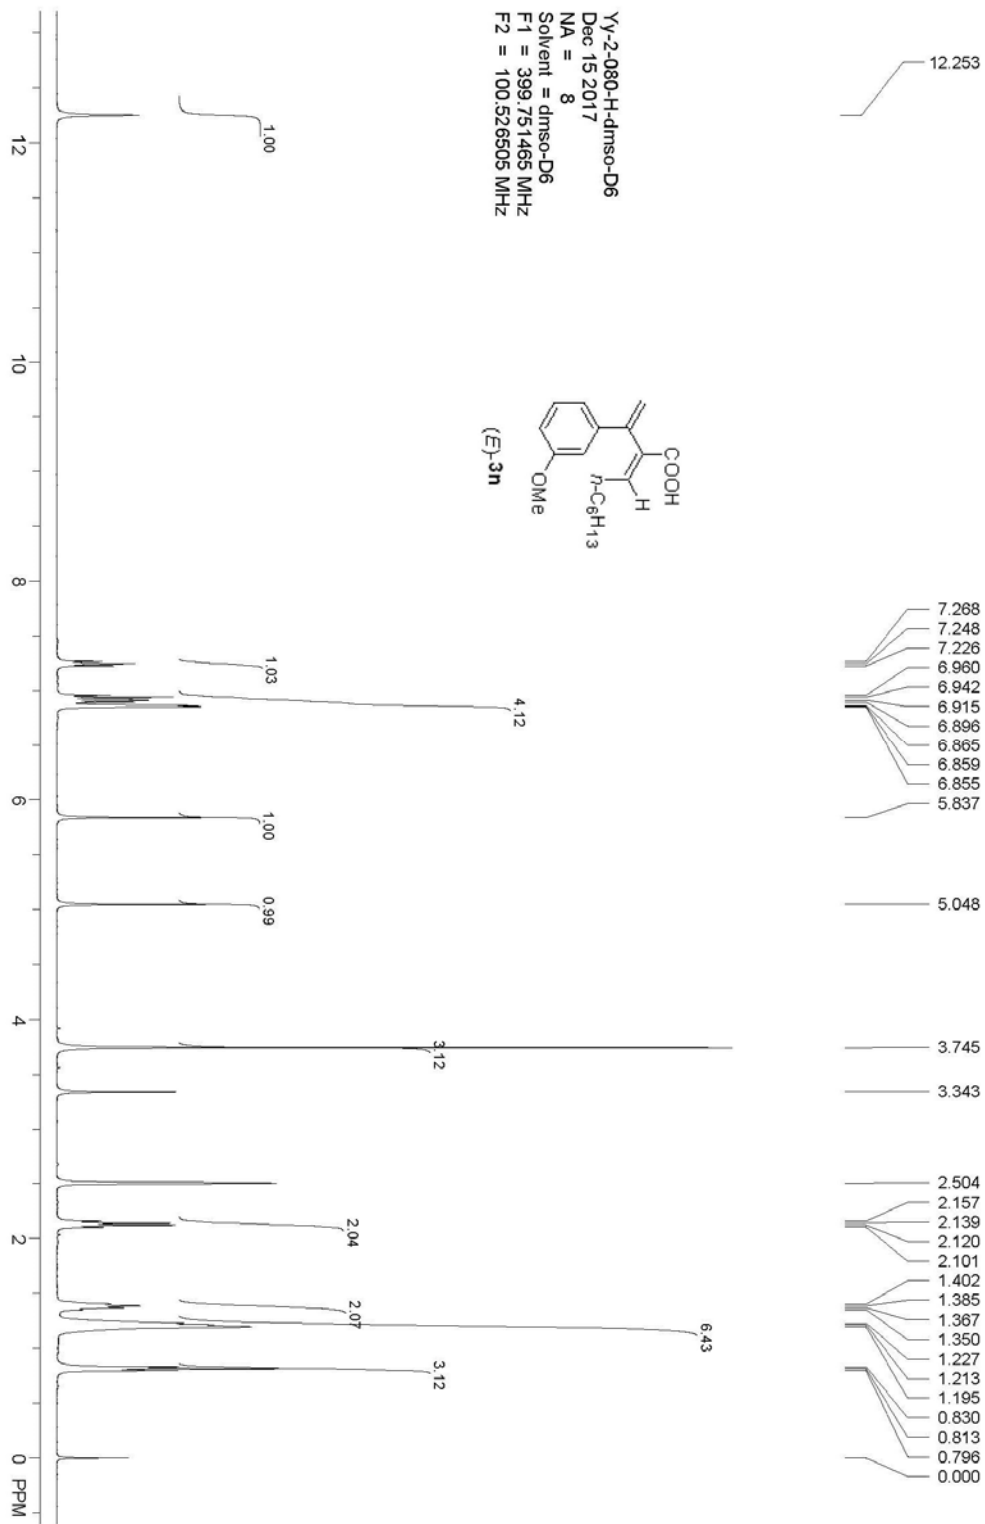

Yy-2-080-C  
Dec 12 2017  
NA = 512  
Solvent = cdcl3  
F1 = 100.527557 MHz  
F2 = 399.749146 MHz

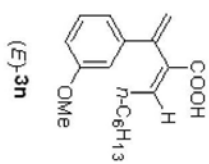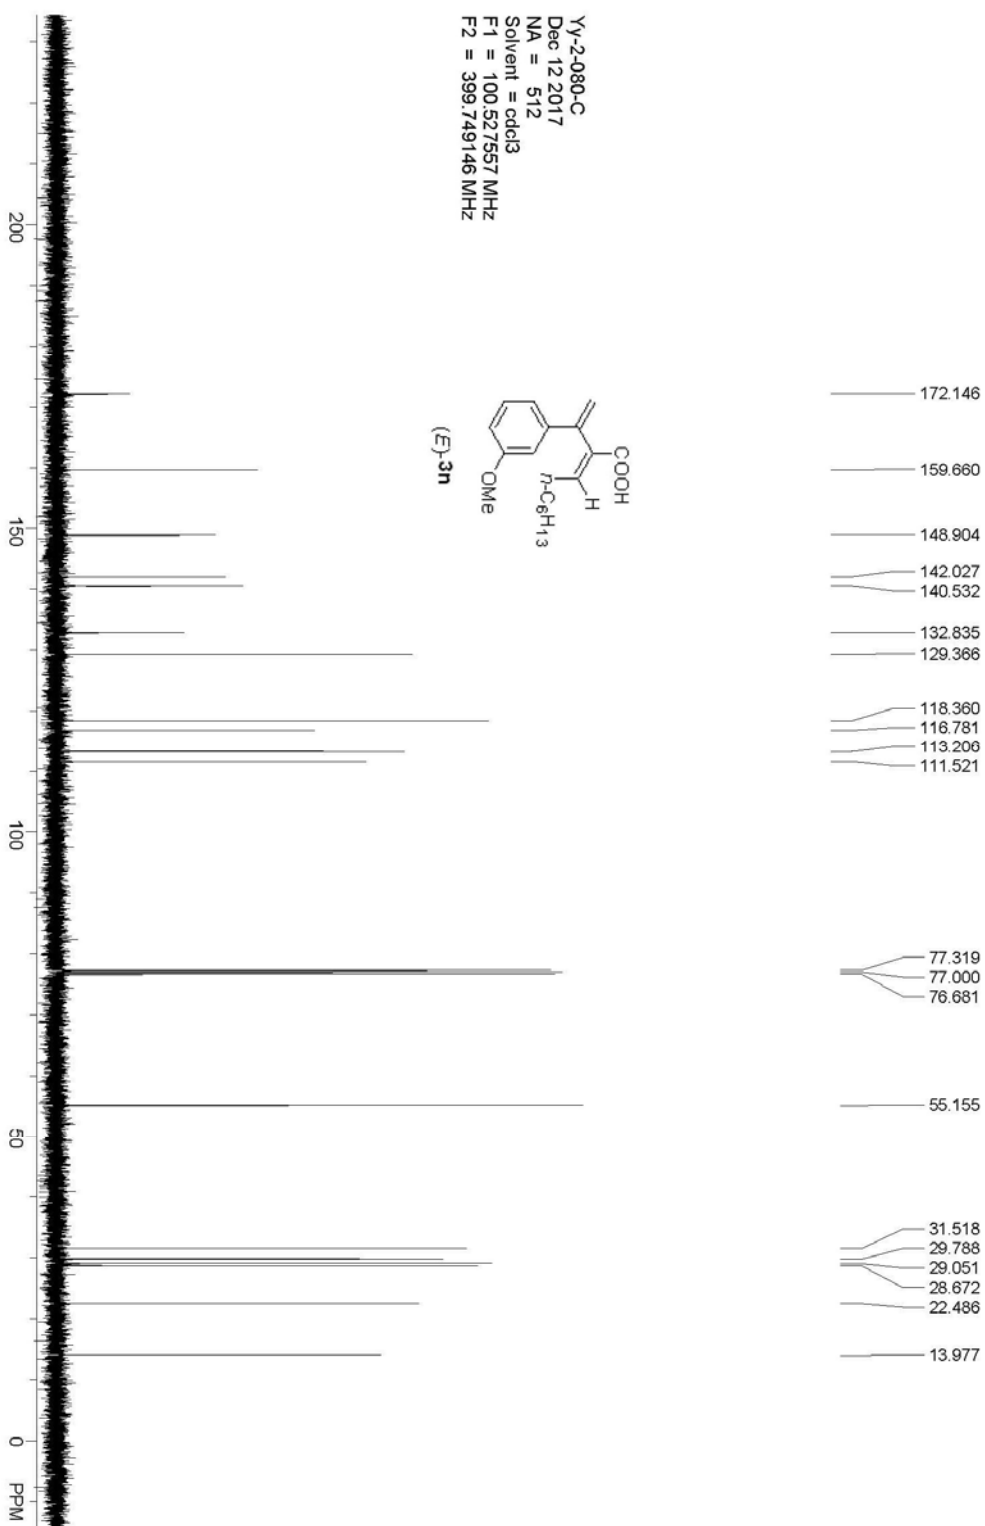

cds/20014h  
Nov 11 2018  
NA = 8  
Solvent = CDCl3  
F1 = 399.72628 MHz  
F2 = 100.519203 MHz

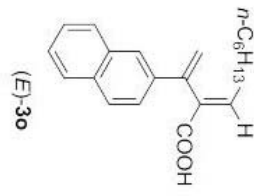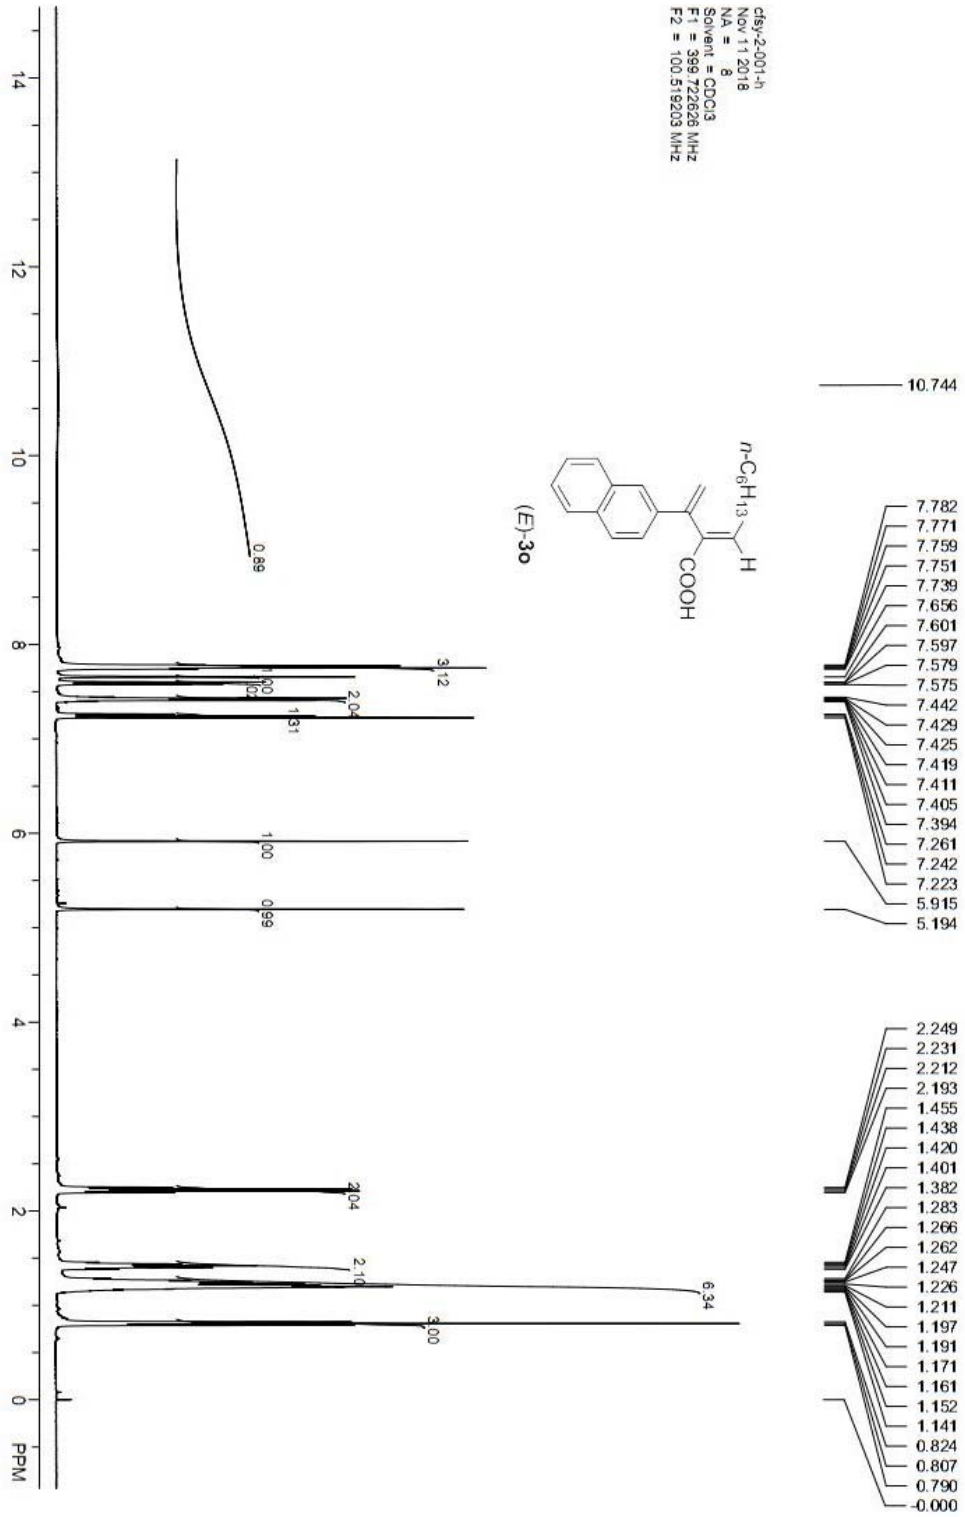

csy-2001-c  
Nov 11 2018  
NA = 80  
Solvent = cdcl3  
F1 = 100.527895 MHz  
F2 = 400.030792 MHz

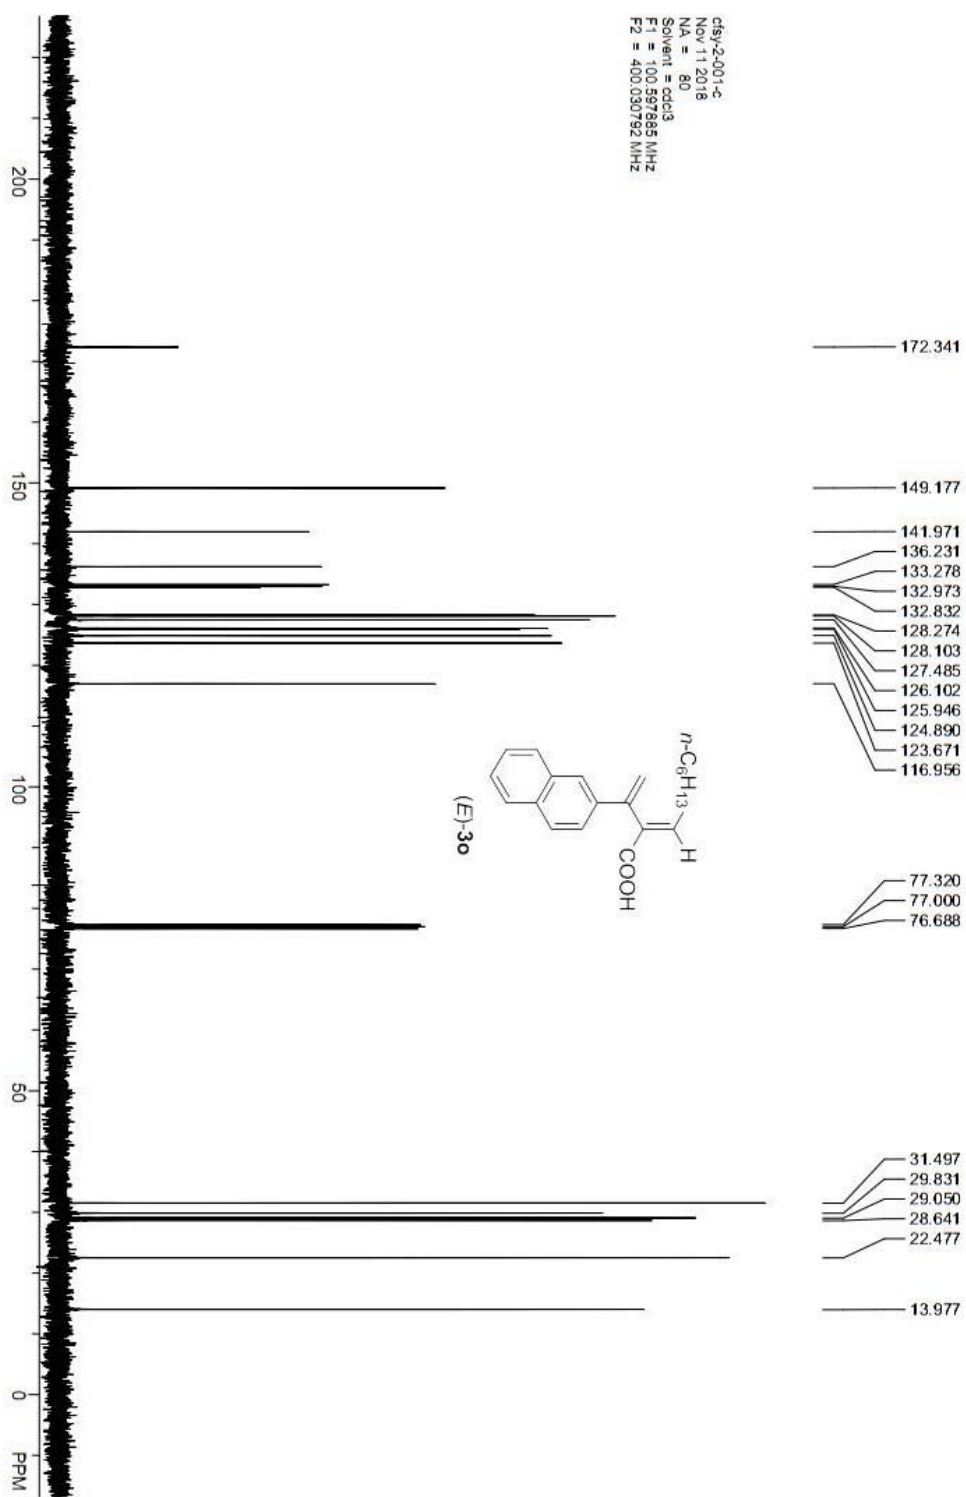

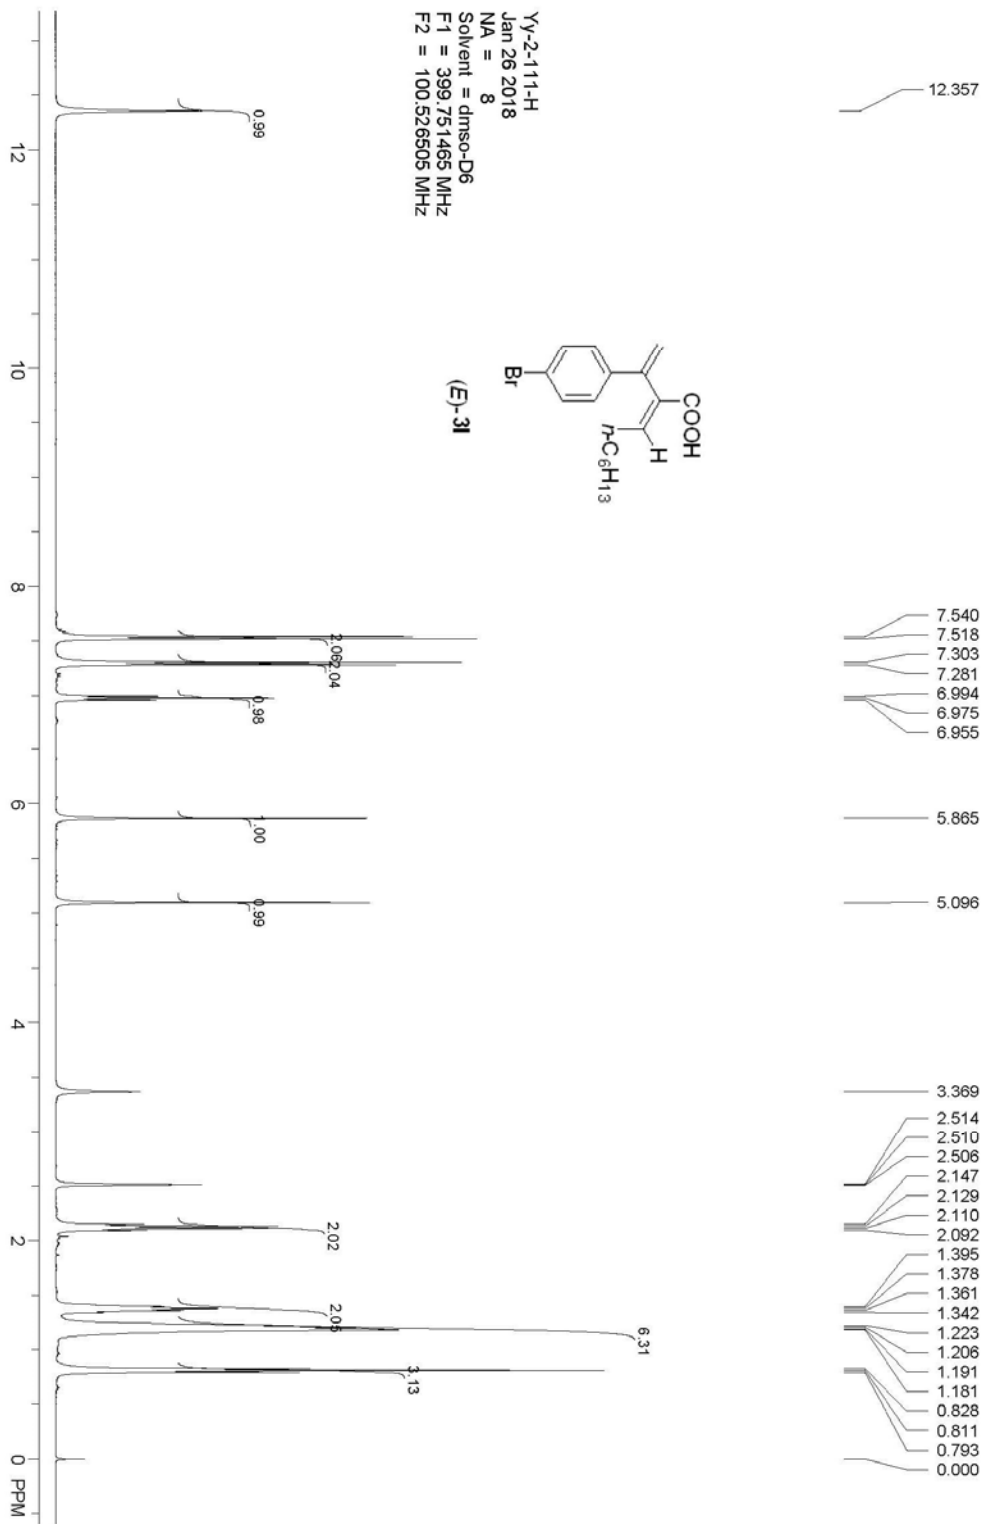

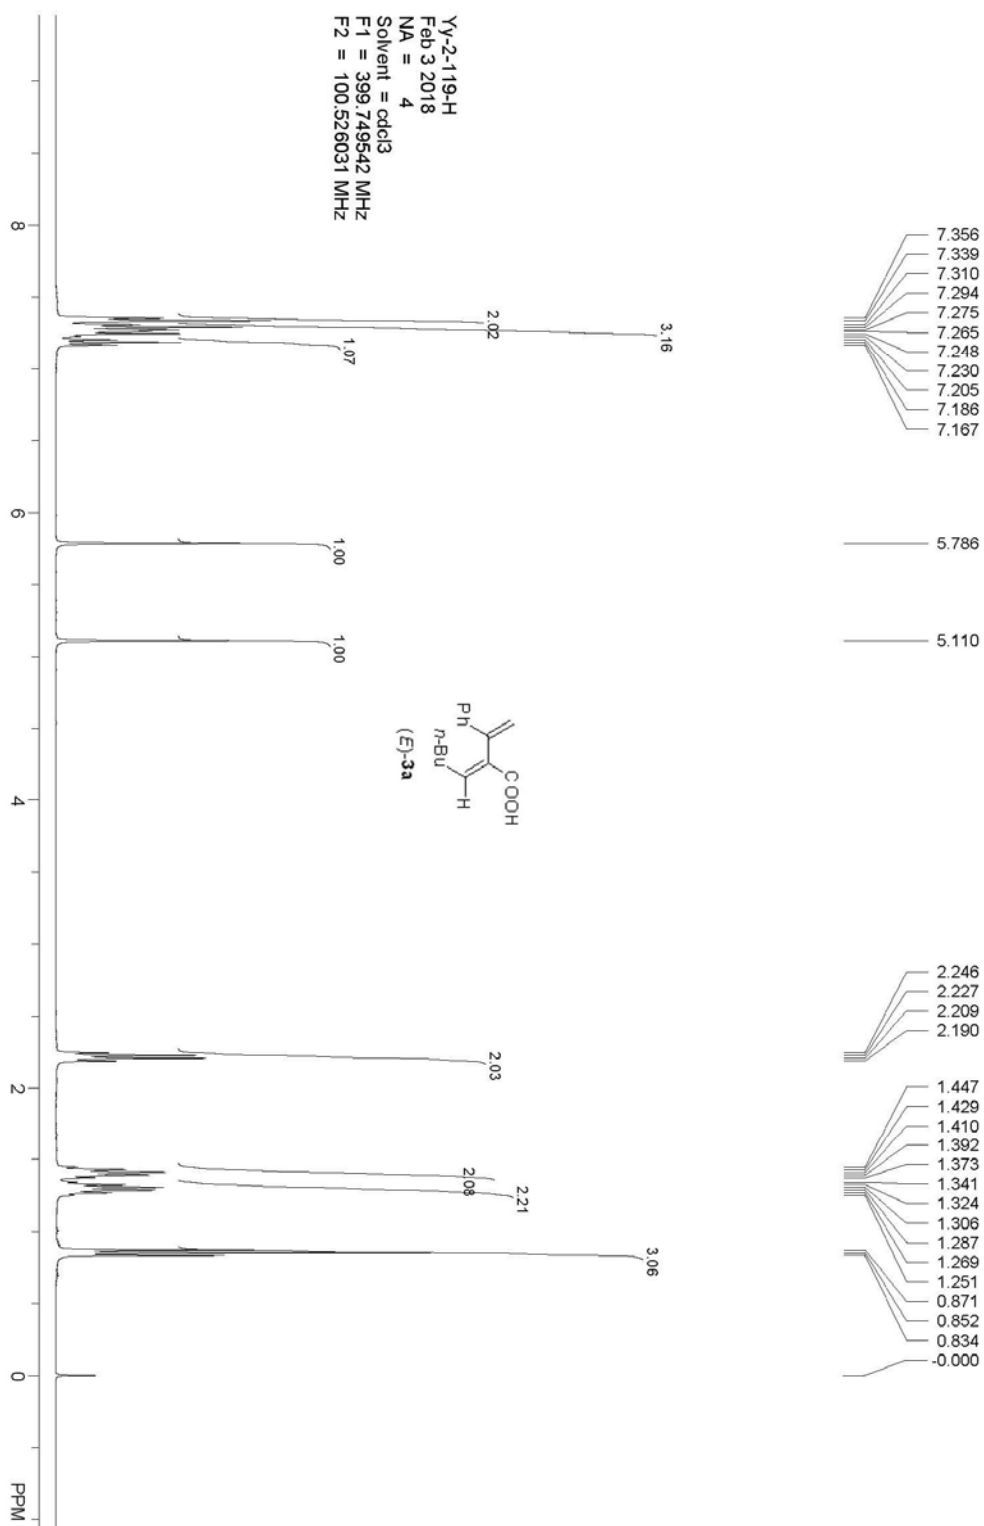



YV-2-119-C  
Feb 3 2018  
NA = 512  
Solvent = cdcl3  
F1 = 399.749542 MHz  
F2 = 100.526031 MHz

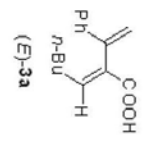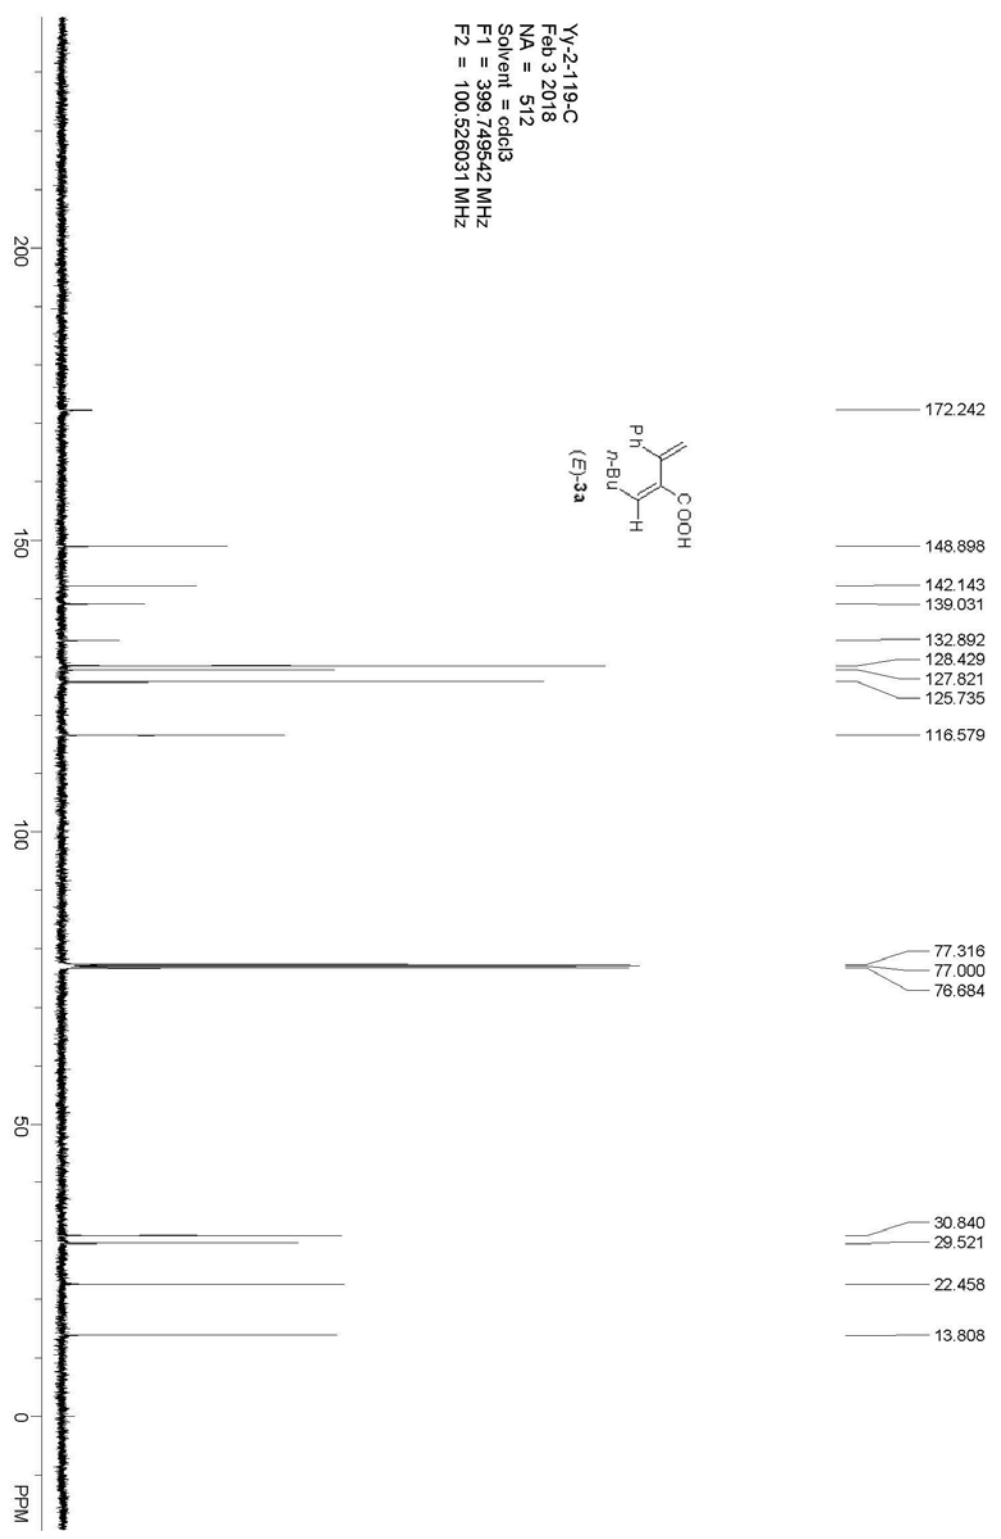

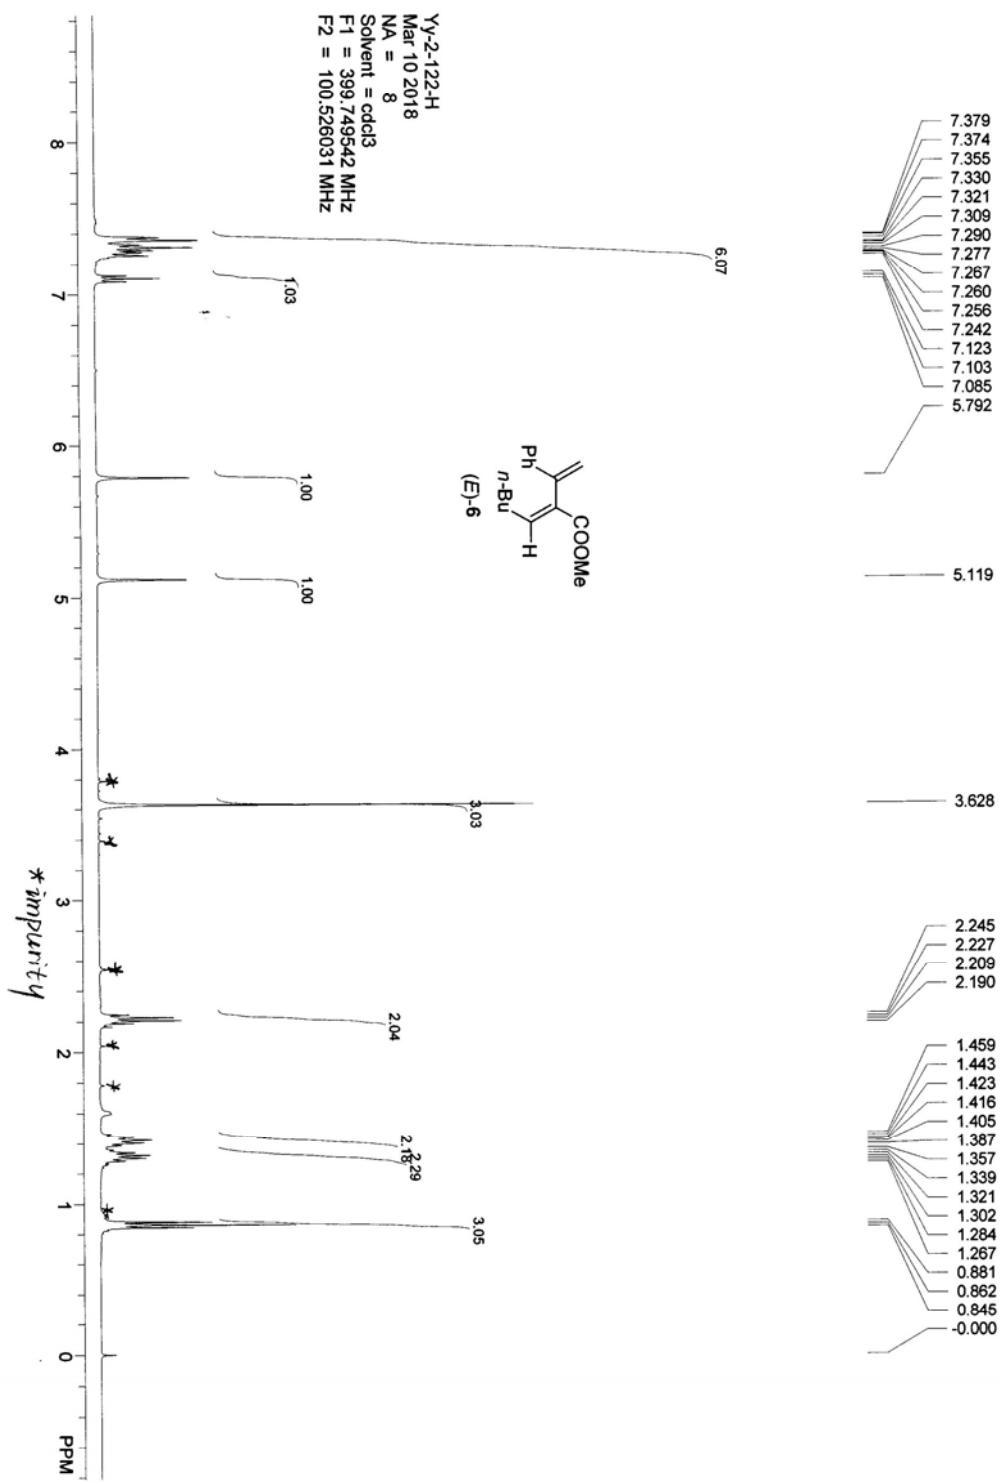

YY-2-122-C  
Mar 10 2018  
NA = 512  
Solvent = cdcl3  
F1 = 100.527557 MHz  
F2 = 399.749146 MHz

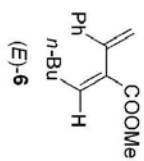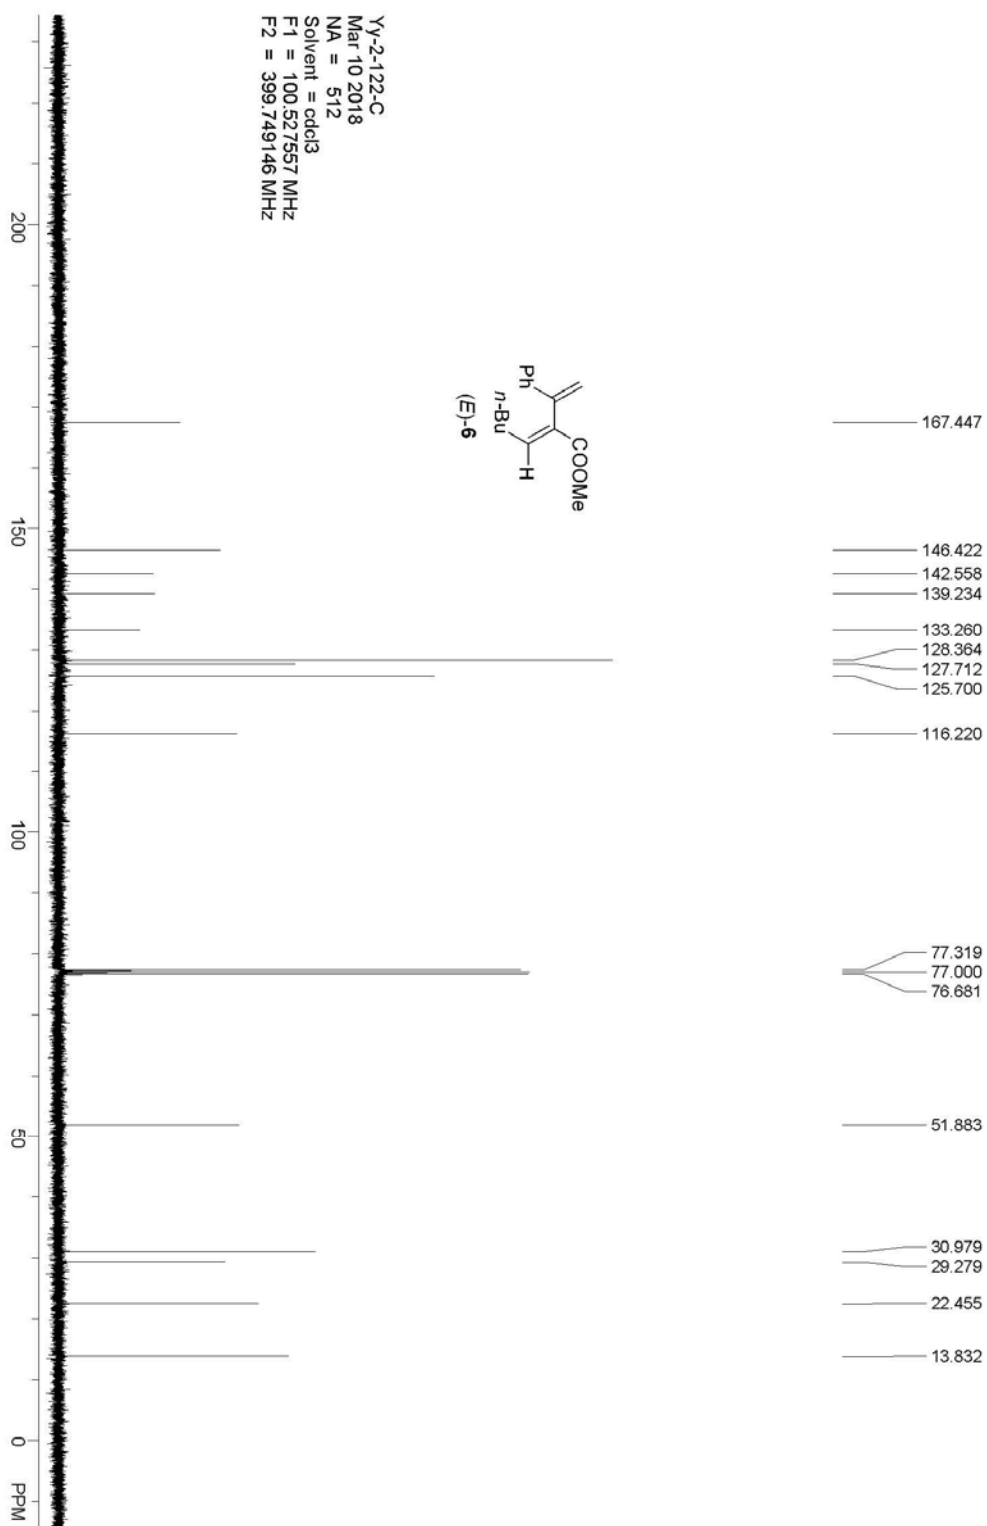

Yy-2-122-purity  
purity = 96%  
77.6 mg product with 17.5 uL dibromomethane  
May 25 2018  
NA = 4  
Solvent = CDCl3  
F1 = 400.130005 MHz  
F2 = 1.000000 MHz

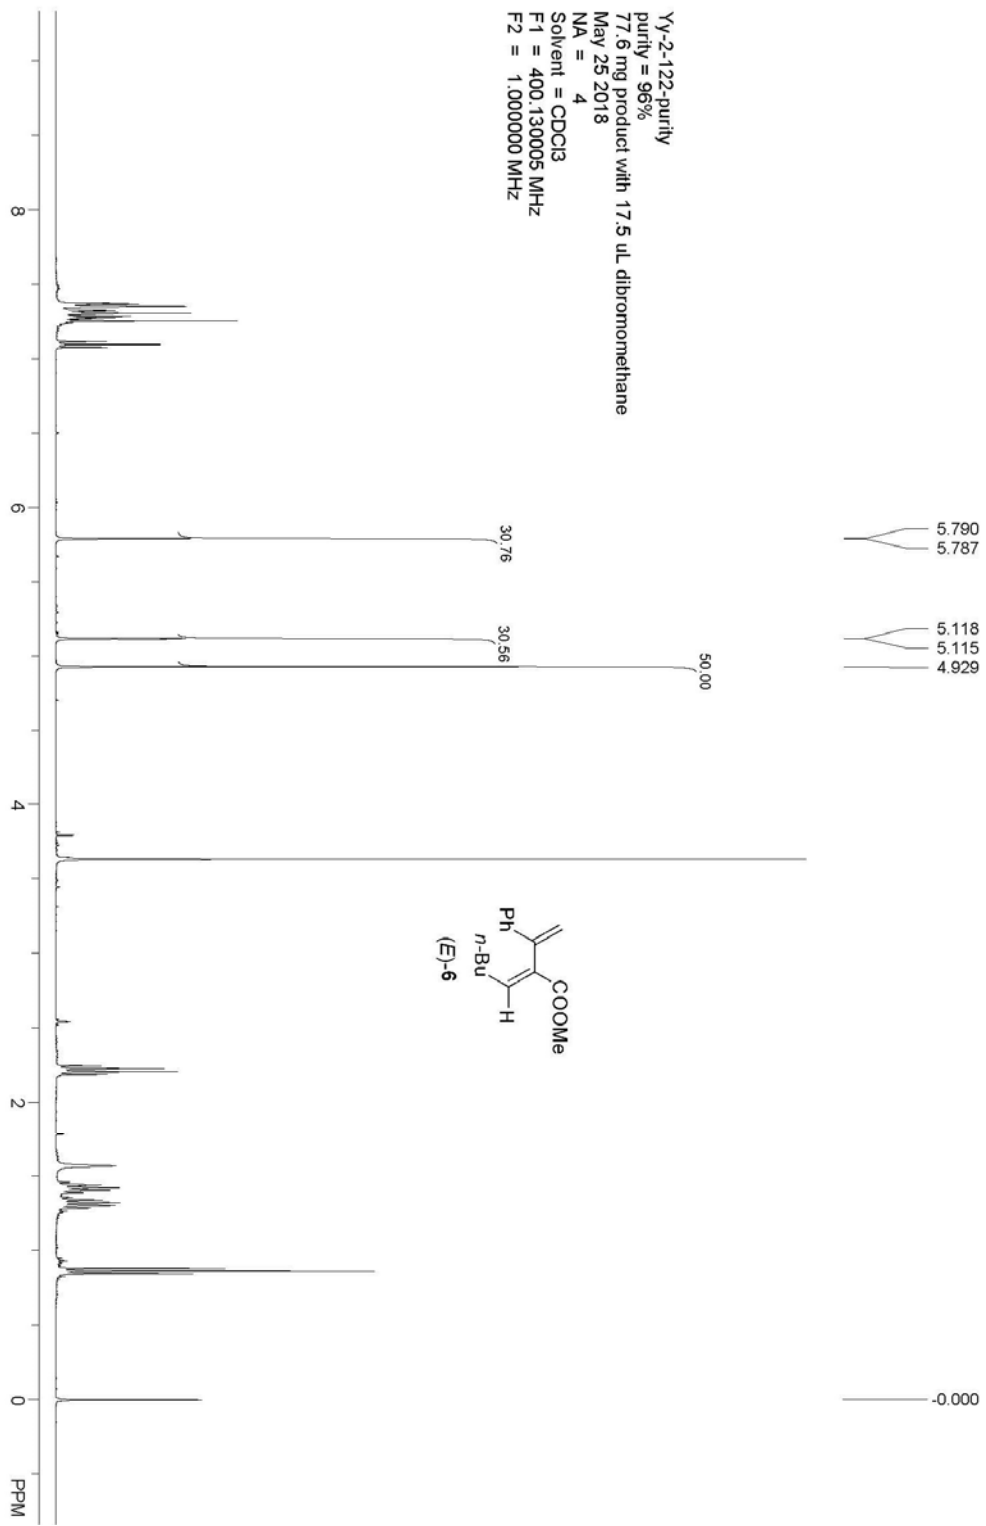

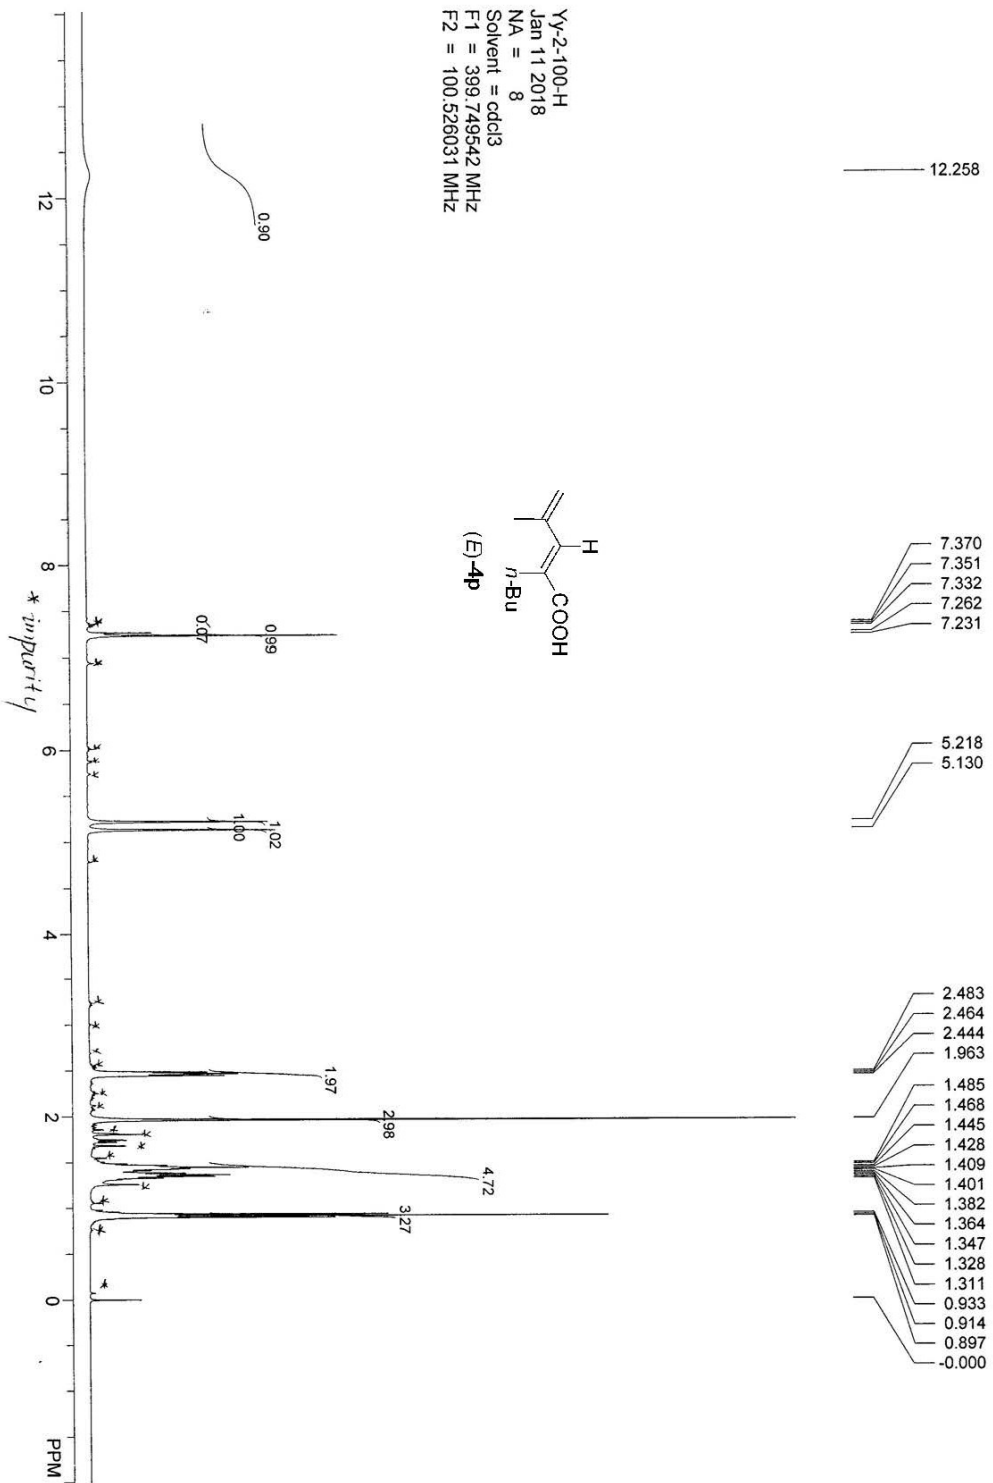

Yy-2-100-C  
Jan 22 2018  
NA = 1000  
Solvent = cdcl3  
F1 = 100.527557 MHz  
F2 = 399.749146 MHz

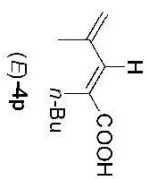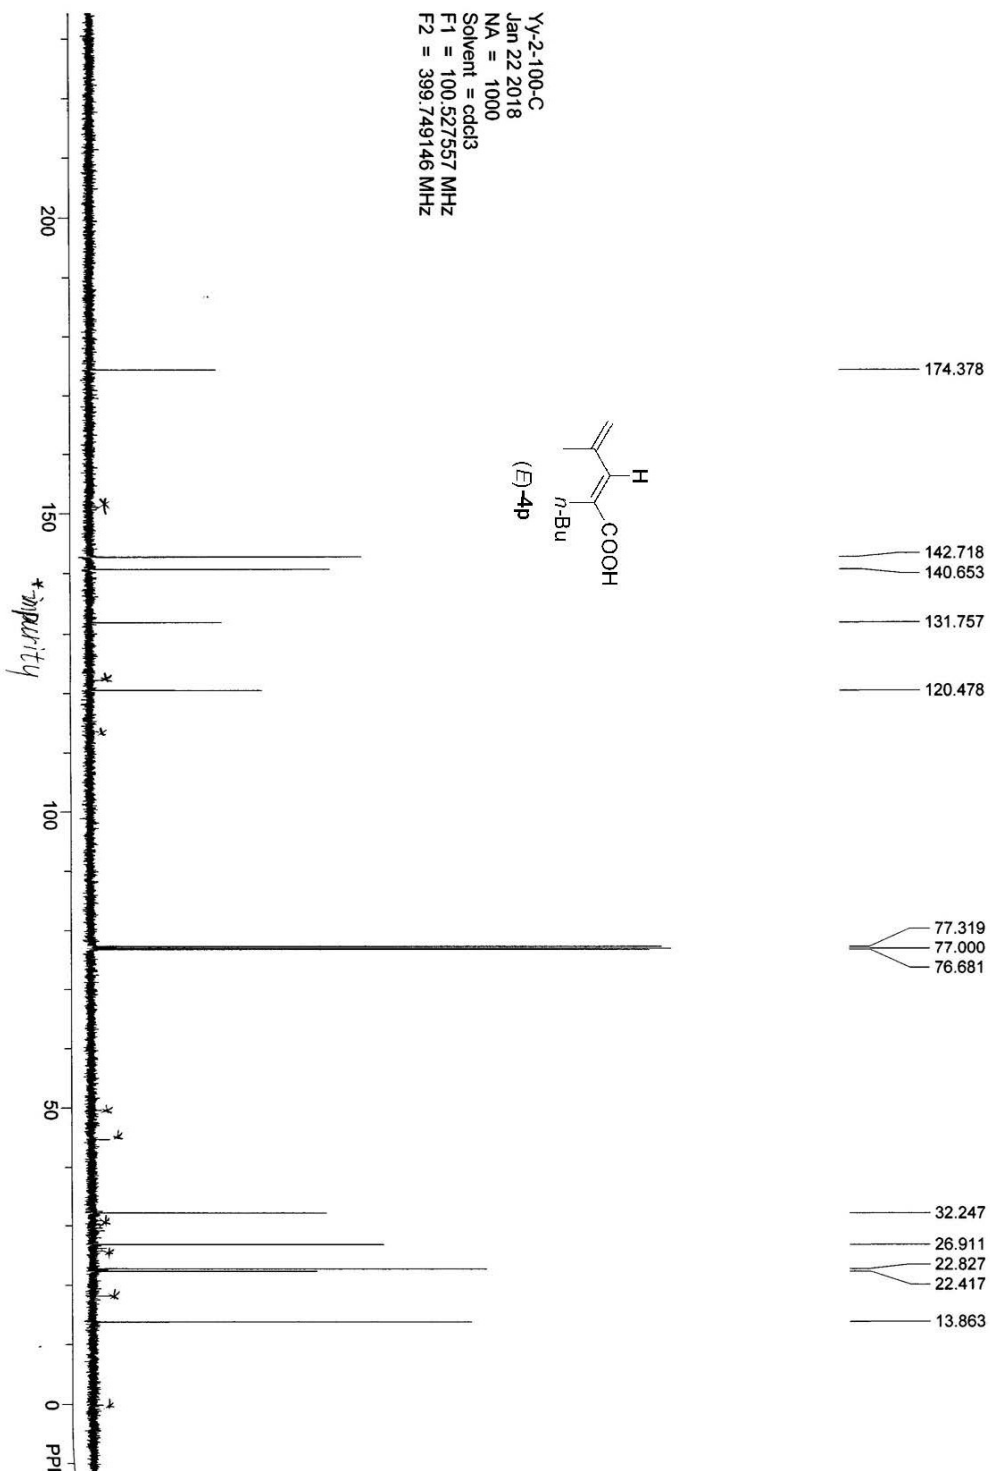

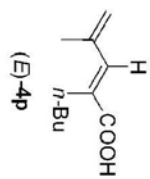

Yy-2-100-purity  
 purity = 90%  
 21.7 mg product with 7 uL dibromomethane  
 Jan 23 2018  
 NA = 8  
 Solvent = cdcl3  
 F1 = 399.749542 MHz  
 F2 = 100.526031 MHz

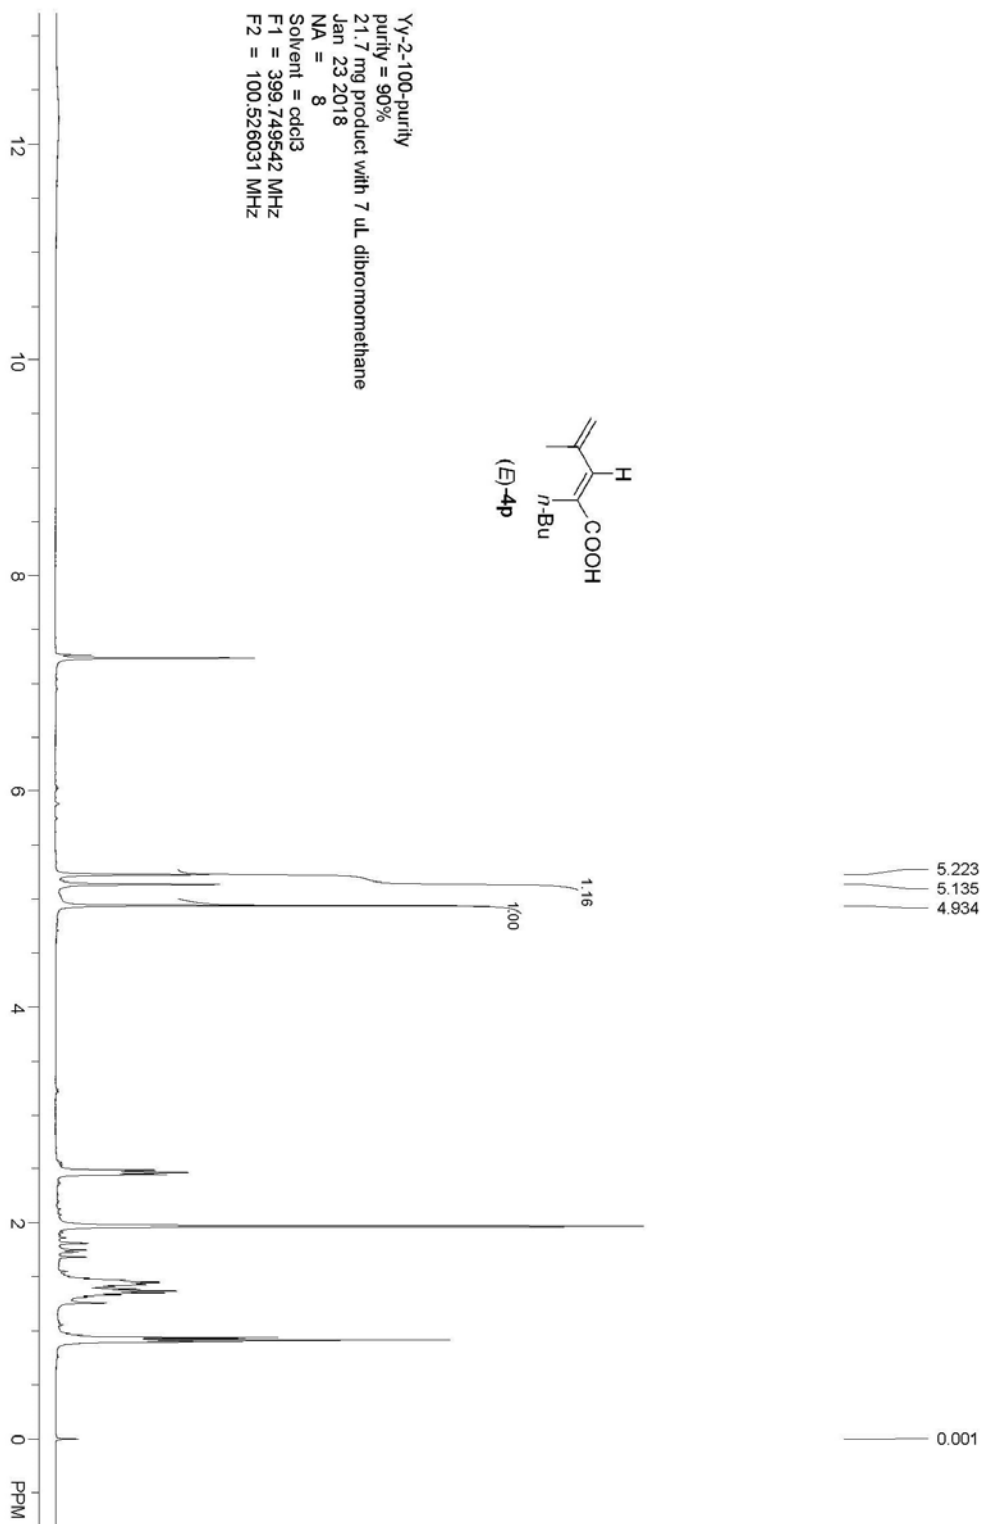

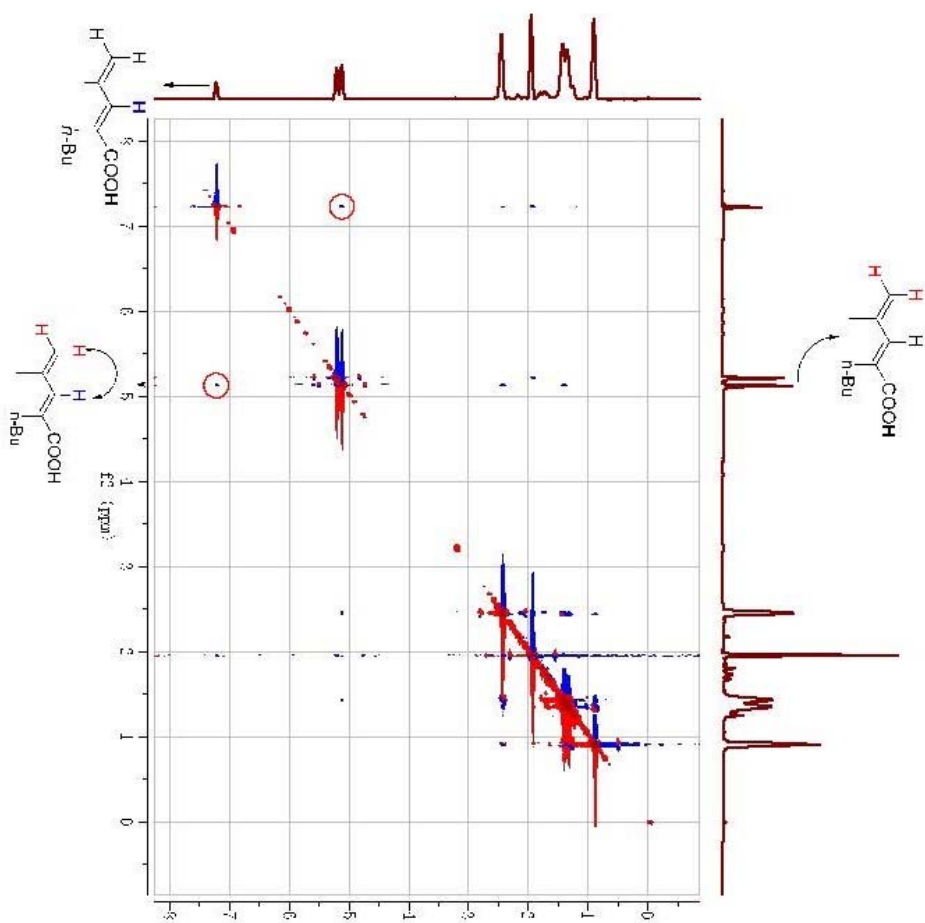

| Parameter                                  | Value        |
|--------------------------------------------|--------------|
| 1 Title                                    | Yr-2-100-NOE |
| 2 Origin                                   | Varian       |
| 3 Solvent                                  | cdcl3        |
| 4 Temperature                              | 26.0         |
| 5 Pulse Sequence                           | NOESY        |
| 6 Experiment                               | 2D-NOESY     |
| 7 Number of Scans                          | 16           |
| 8 Receiver Gain                            | 36           |
| 9 Relaxation Delay                         | 1.0000       |
| 10 Pulse Width                             | 0.0000       |
| 11 Acquisition Time                        | 0.1499       |
| 12 Spectrometer Frequency (399.75, 399.75) |              |
| 13 Spectral Width (3655.0, 3655.0)         |              |
| 14 Lowest Frequency (-350.8, -350.8)       |              |
| 15 Nucleus                                 | (1H, 1H)     |
| 16 Acquired Size (548, 200)                |              |
| 17 Spectral Size (1024, 1024)              |              |



7.580  
7.560  
7.323  
7.305  
7.285  
7.240  
7.222  
7.204  
6.409  
6.391  
6.374  
6.357

2.484  
2.467  
2.449  
2.045  
2.027  
1.646  
1.629  
1.611  
1.592  
1.575  
1.544  
1.526  
1.507  
1.489  
1.471  
1.453  
0.968  
0.949  
0.931  
-0.000

Yy-3-090-1-H  
Nov 27 2018  
NA = 4  
Solvent = CDCl3  
F1 = 400.130035 MHz  
F2 = 1.0000000 MHz

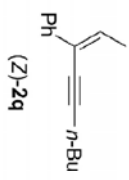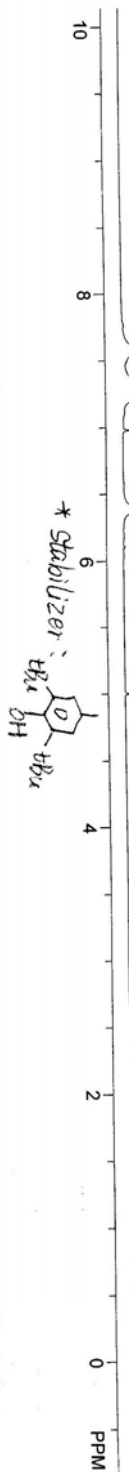

Yy-3-090-p1-C  
Nov 27 2018  
NA = 256  
Solvent = CDCl3  
F1 = 100.612770 MHz  
F2 = 1.000000 MHz

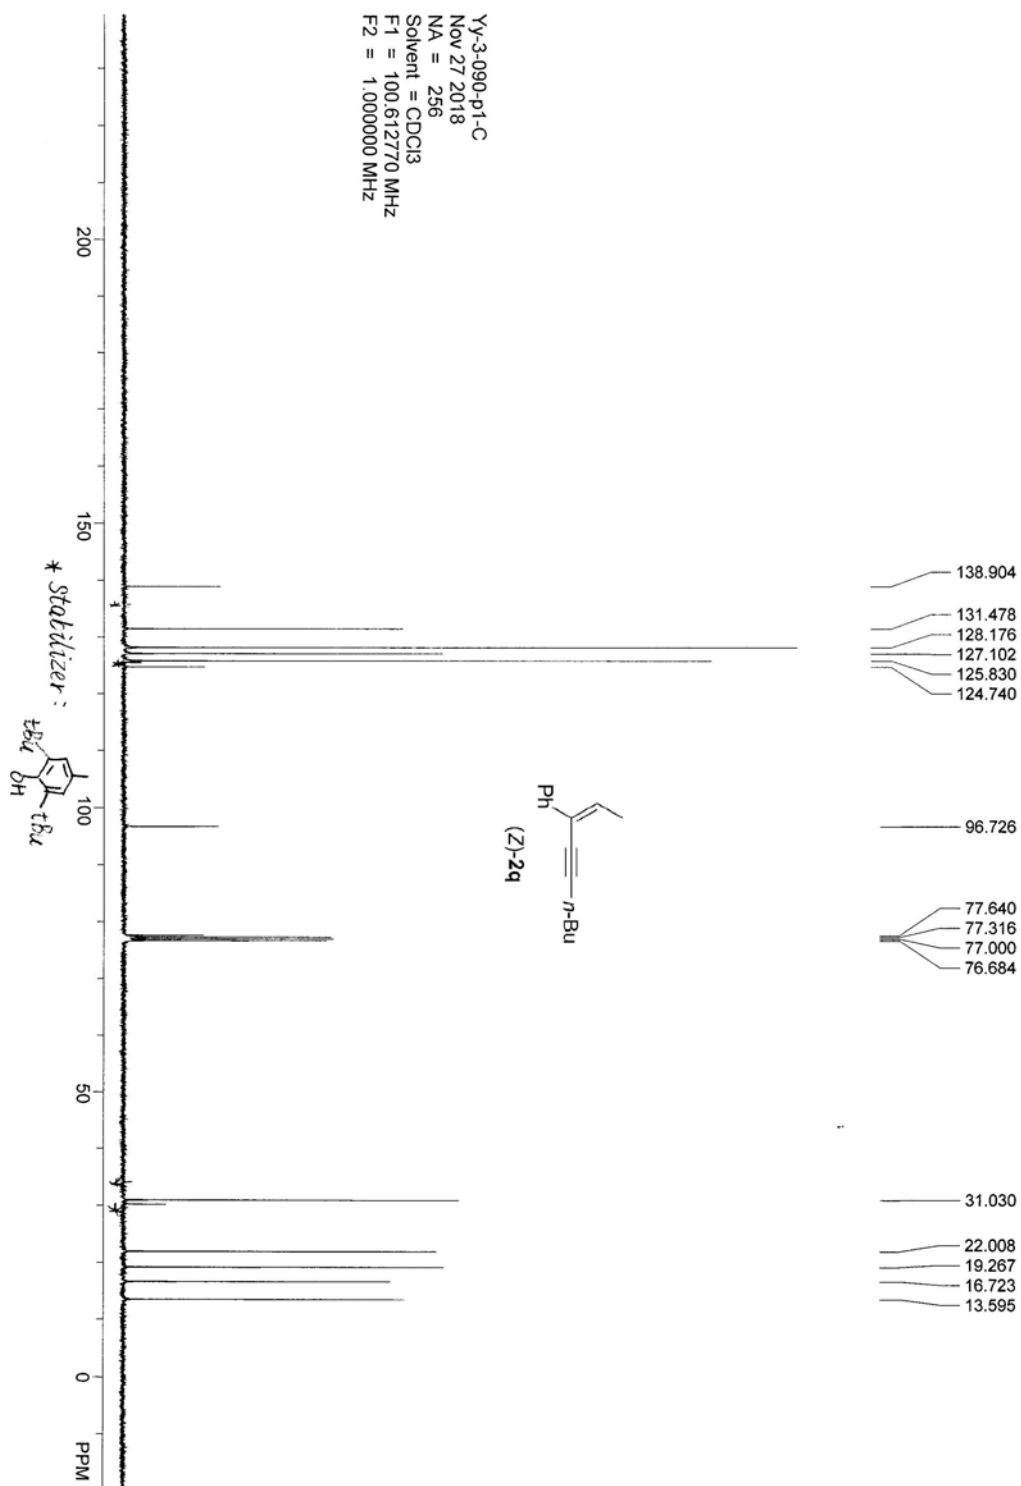

Yy-3-090-p3-benzene-D6  
 Nov 27 2018  
 NA = 16  
 Solvent = C6D6  
 F1 = 400.130005 MHz  
 F2 = 1.000000 MHz

- 7.359
- 7.340
- 7.288
- 7.269
- 7.251
- 7.160
- 7.127
- 7.108
- 7.060
- 7.042
- 7.024
- 6.090
- 6.073
- 6.056
- 6.039

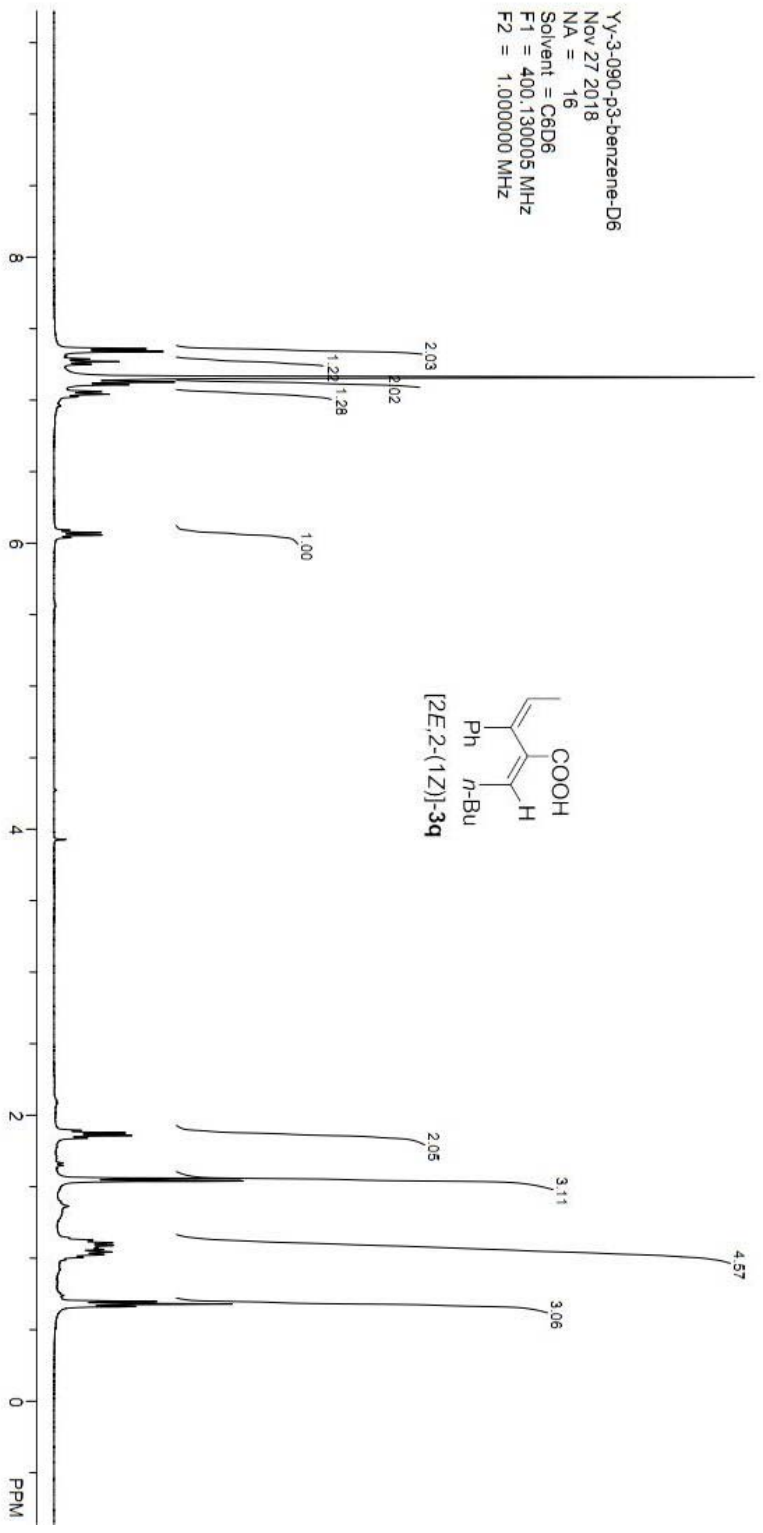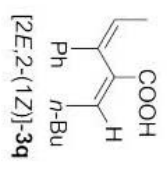

- 1.893
- 1.875
- 1.857
- 1.838
- 1.556
- 1.539
- 1.141
- 1.125
- 1.106
- 1.088
- 1.072
- 1.061
- 1.043
- 1.024
- 1.006
- 0.989
- 0.697
- 0.679
- 0.662

YY-3-090-p3-C  
Nov 27 2018  
NA = 256  
Solvent = CDCl3  
F1 = 100.612770 MHz  
F2 = 1.000000 MHz

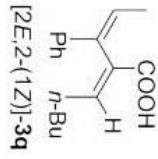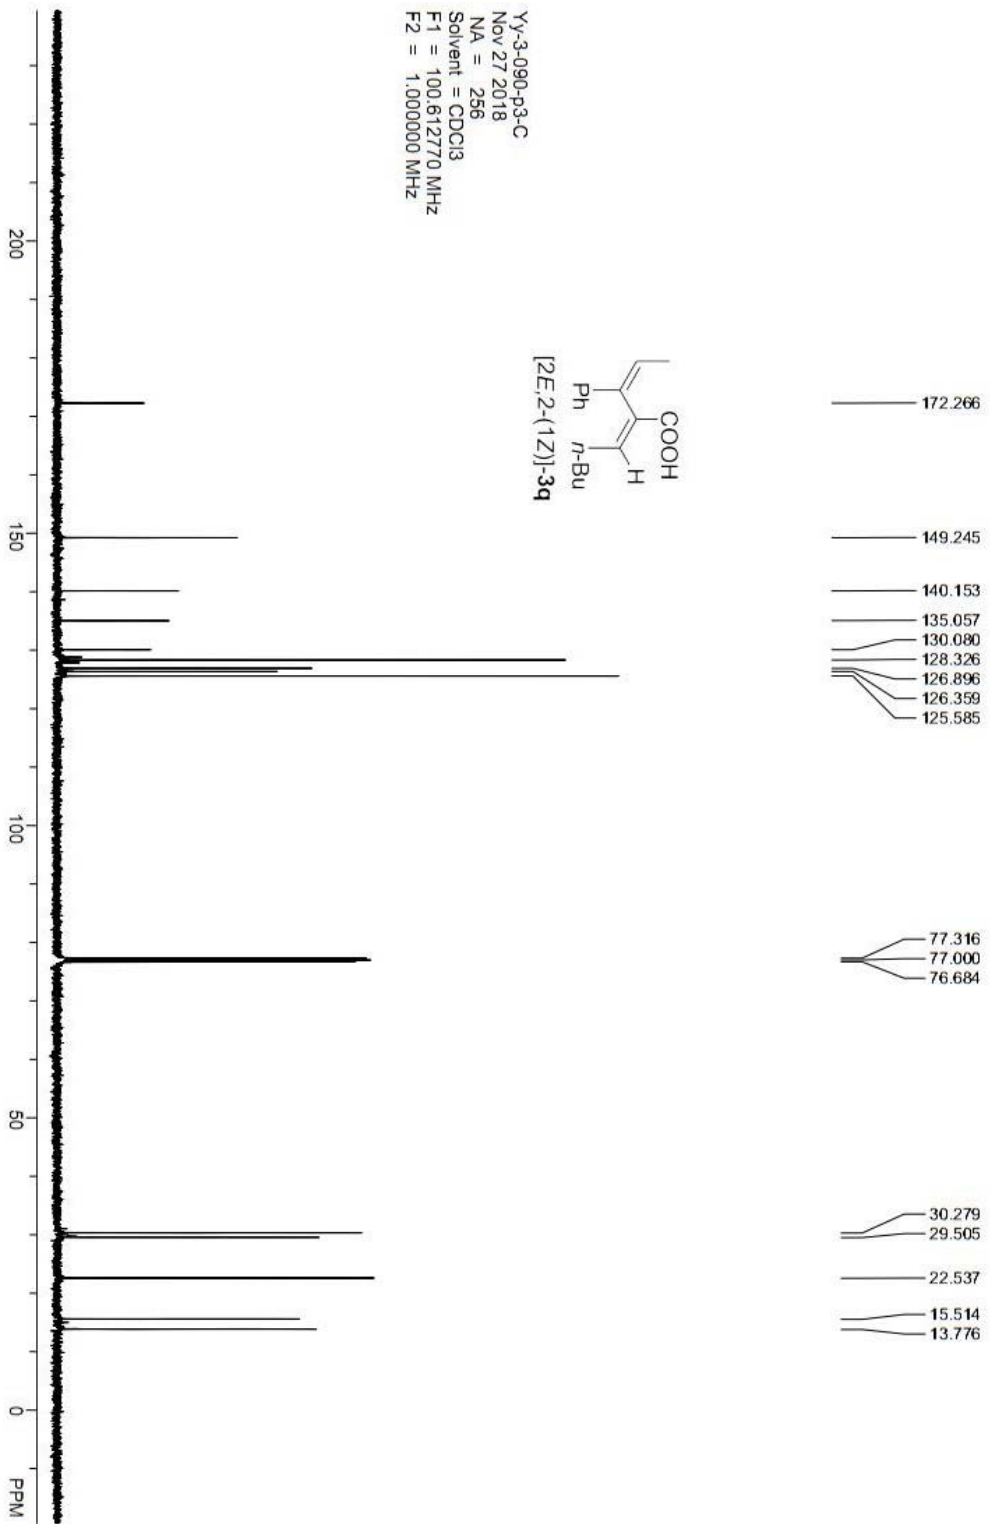

Yy-3-090-p3-purity  
purity = 93%  
29.2 mg product with 17.5 uL dibromomethane  
Nov 27 2018  
NA = 4  
Solvent = CDCl3  
F1 = 400.130005 MHz  
F2 = 1.000000 MHz

6.284  
6.267  
6.249  
6.232

4.933

-0.000

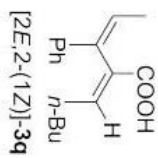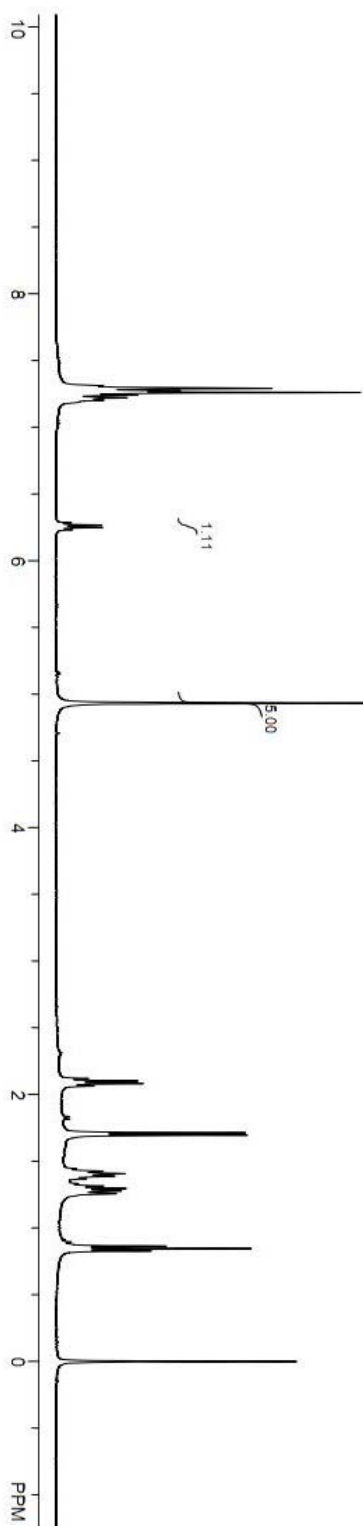

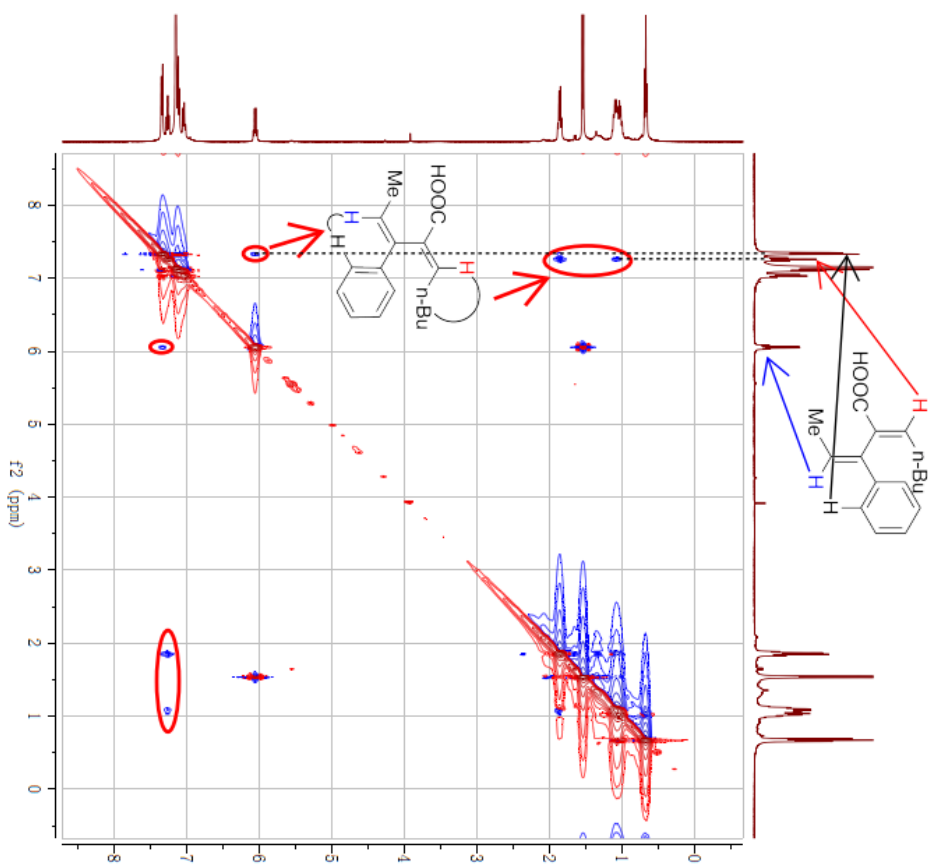

| Parameter                                  | Value               |
|--------------------------------------------|---------------------|
| 1 Title                                    | Yy-3-090-p-3-NOE    |
| 2 Origin                                   | Bruker BioSpin GmbH |
| 3 Solvent                                  | C6D6                |
| 4 Temperature                              | 297.7               |
| 5 Pulse Sequence                           | noesygpphpp         |
| 6 Experiment                               | NOESY               |
| 7 Number of Scans                          | 4                   |
| 8 Receiver Gain                            | 20                  |
| 9 Relaxation Delay                         | 1.9836              |
| 10 Pulse Width                             | 10.0000             |
| 11 Presaturation Frequency                 |                     |
| 12 Spectrometer Frequency (400.13, 400.13) |                     |
| 13 Spectral Width (3759.4, 3759.4)         |                     |
| 14 Lowest Frequency (-273.1, -273.1)       |                     |
| 15 Nucleus (1H, 1H)                        |                     |
| 16 Acquired Size (1024, 256)               |                     |
| 17 Spectral Size (1024, 1024)              |                     |

7.578  
7.559  
7.323  
7.305  
7.286  
7.240  
7.222  
7.204  
6.409  
6.392  
6.374  
6.357

2.484  
2.467  
2.449  
2.045  
2.027  
1.646  
1.629  
1.611  
1.593  
1.575  
1.544  
1.526  
1.508  
1.489  
1.471  
1.453  
0.968  
0.950  
0.932  
-0.000

Yy-3-094-1-H  
Dec 1 2018  
NA = 4  
Solvent = CDCl3  
F1 = 400.130035 MHz  
F2 = 1.000000 MHz

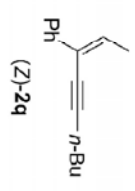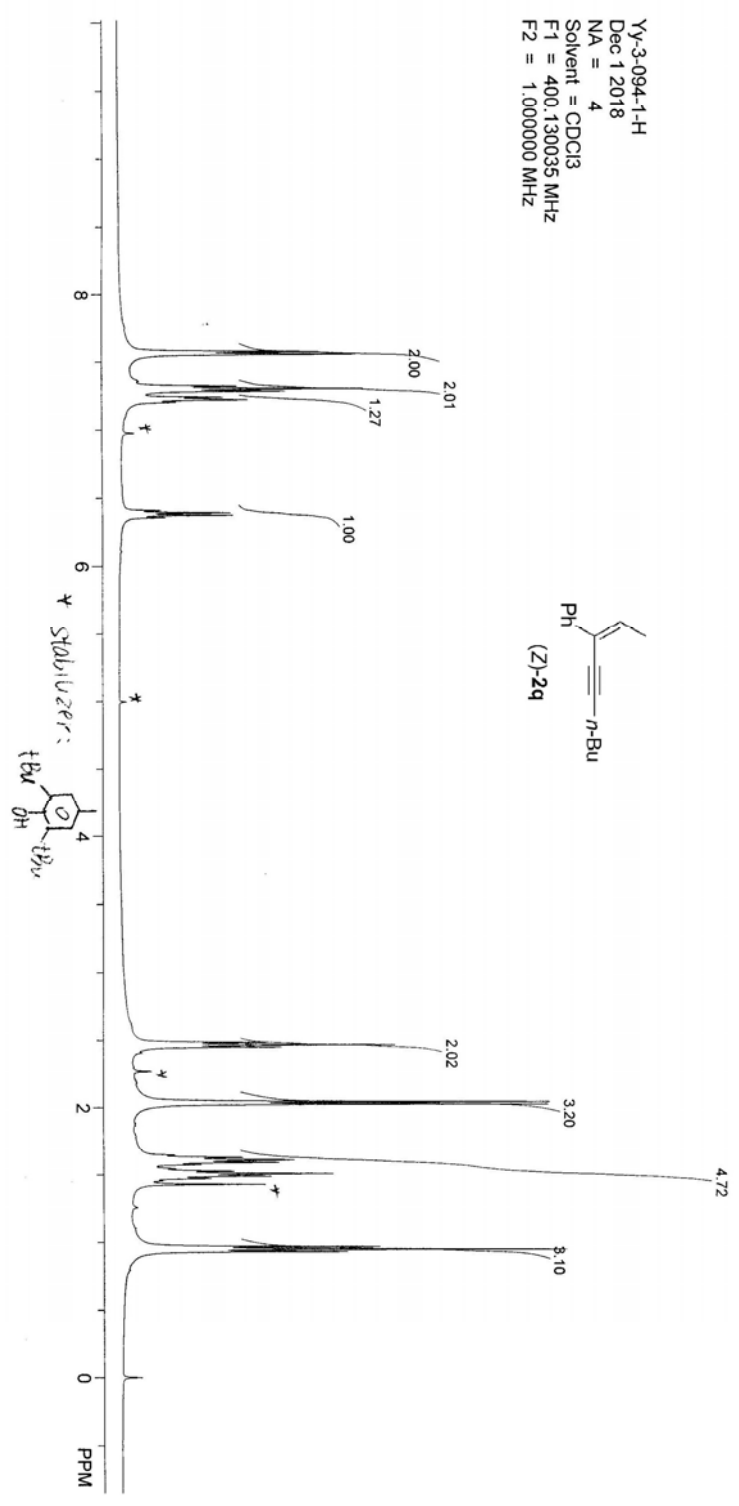

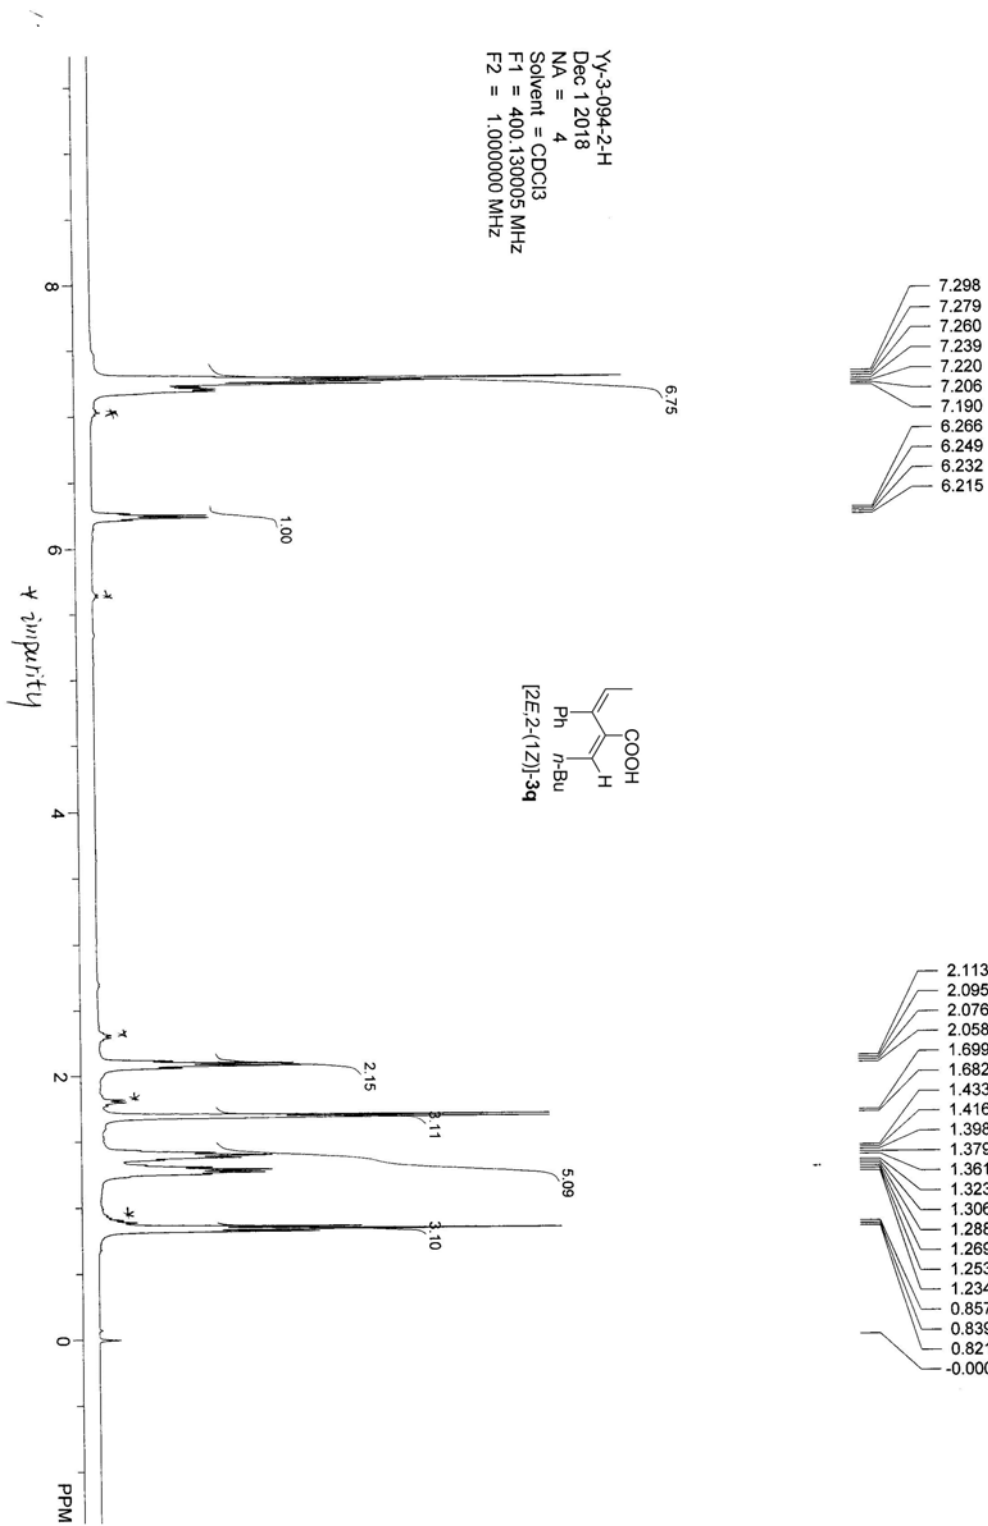



6.267  
6.250  
6.232  
6.216

4.912

-0.000

Yy-3-094-2-purity  
purity = 93%  
40.4 mg product with 7 uL dibromomethane  
Dec 1 2018  
NA = 4  
Solvent = CDCl3  
F1 = 400.130005 MHz  
F2 = 1.000000 MHz

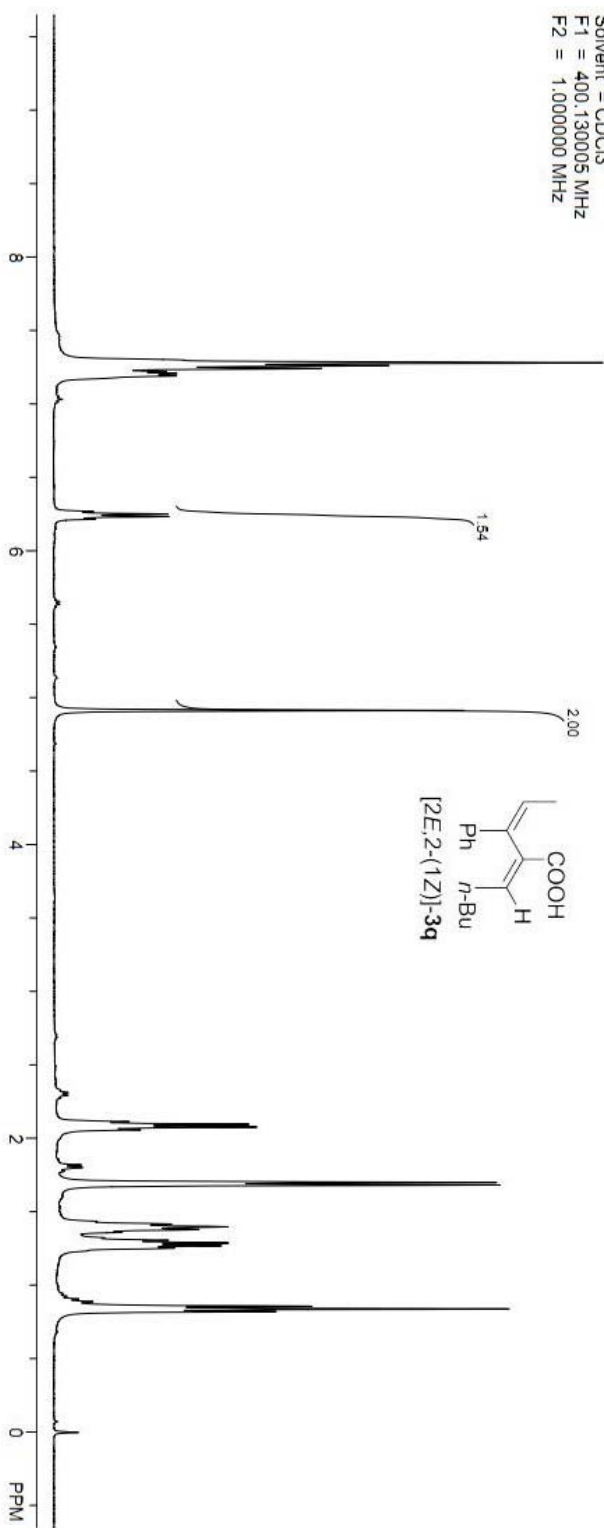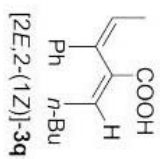

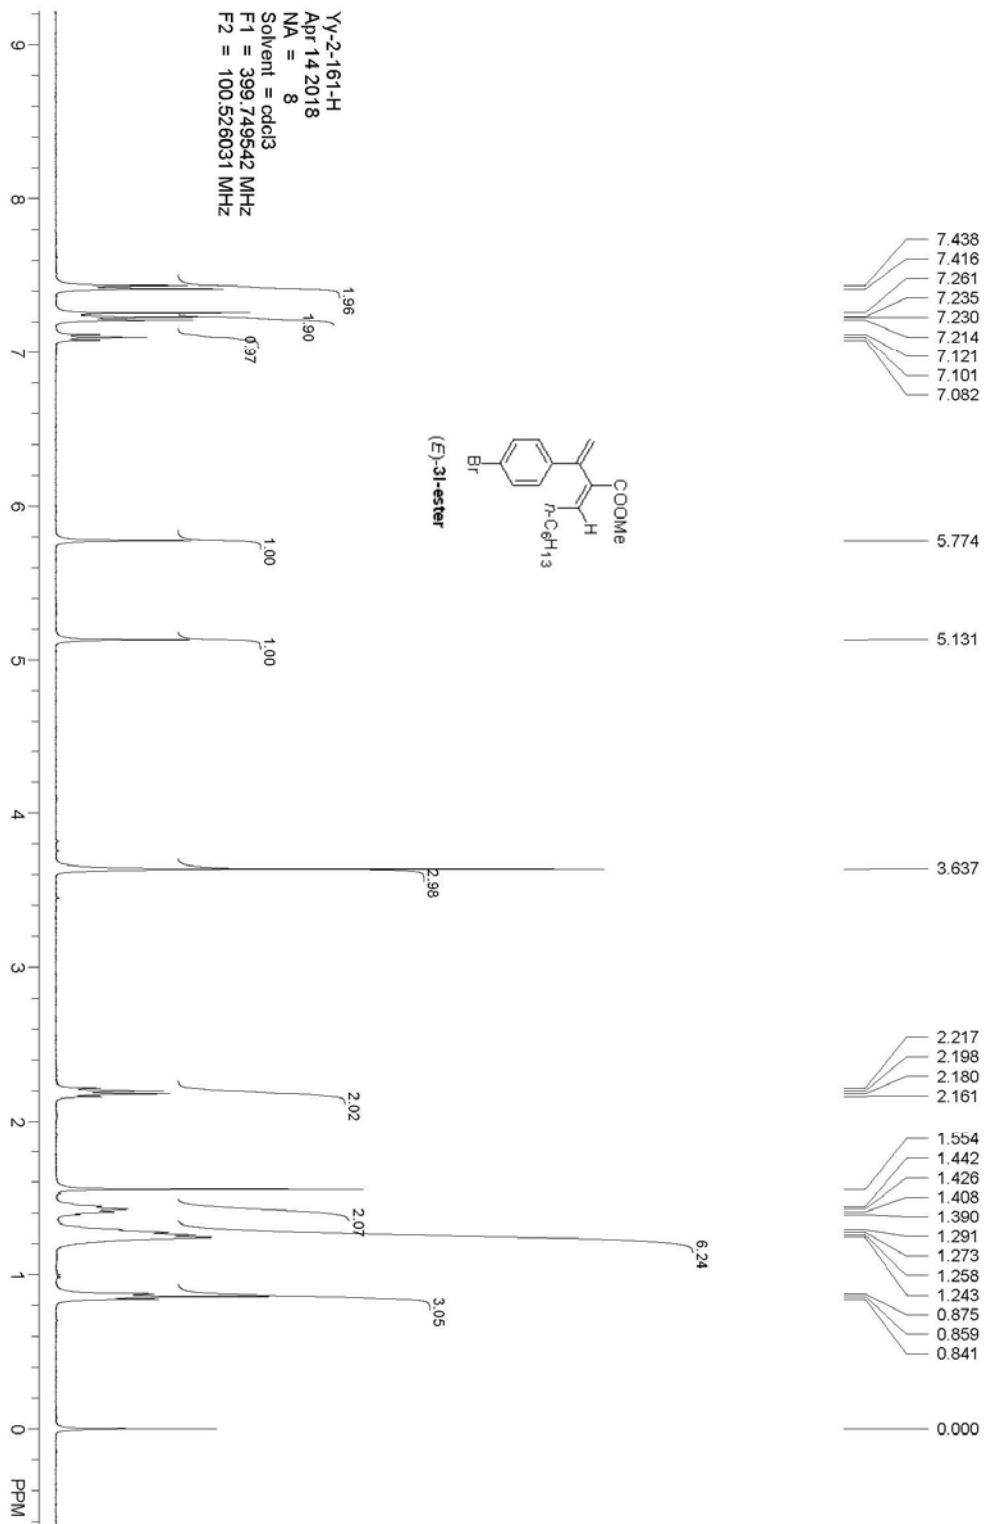

YY-2-161-C  
Apr 16 2018  
NA = 1000  
Solvent = CDCl3  
F1 = 399.749542 MHz  
F2 = 100.526031 MHz

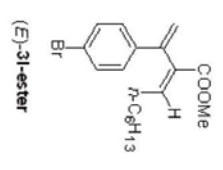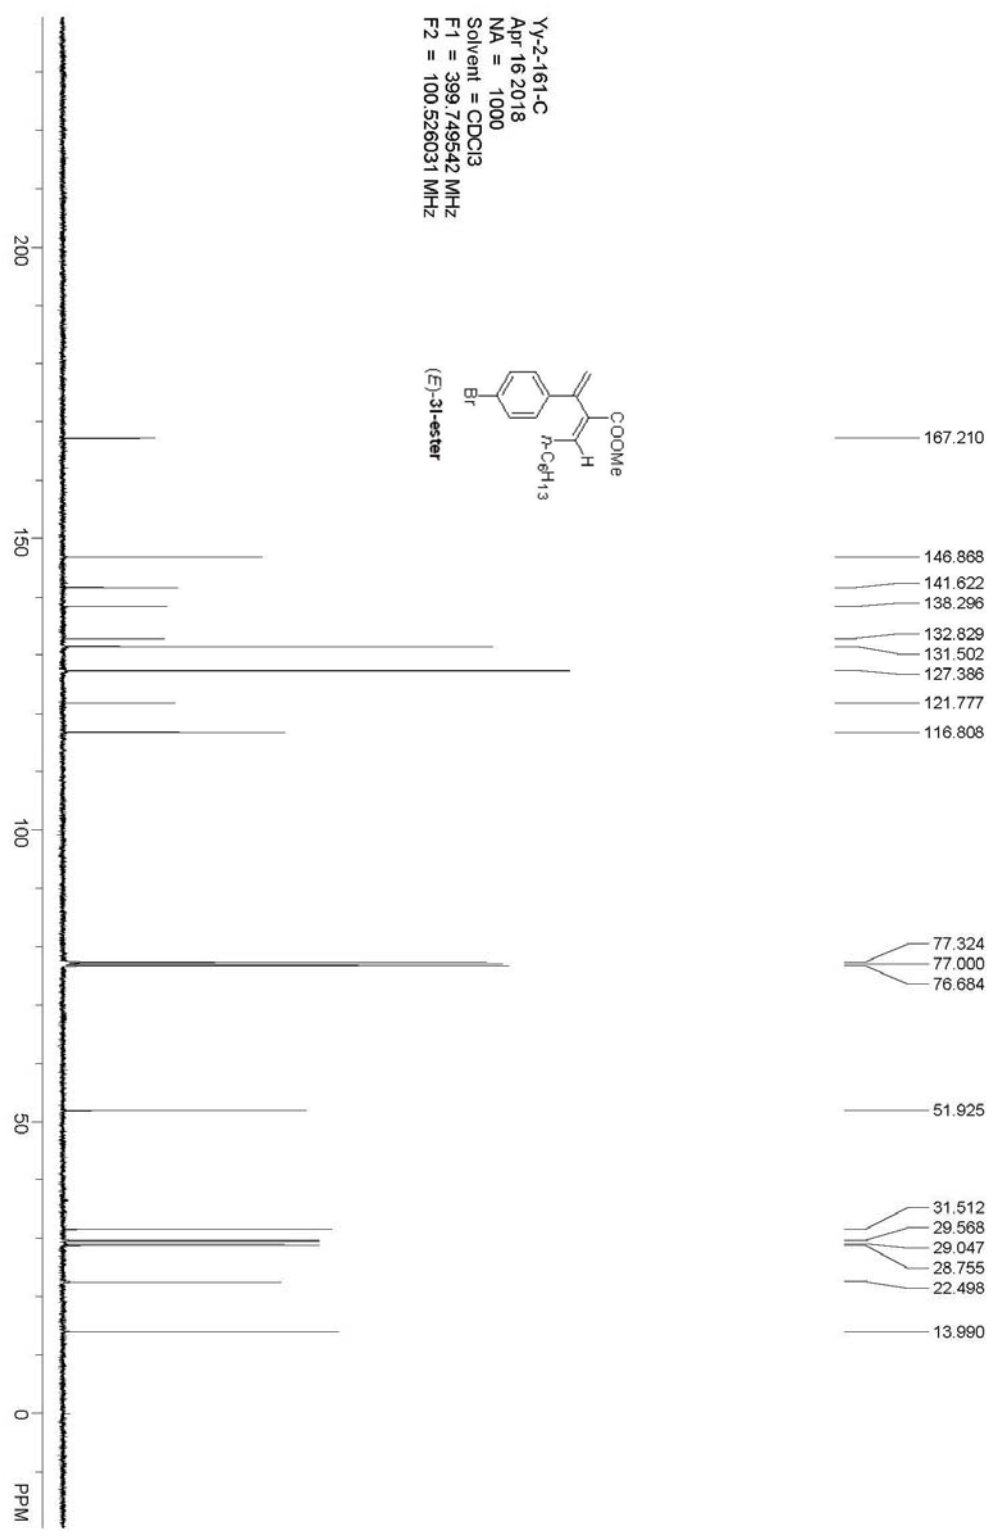

YY-2-180-H  
 Apr 30 2018  
 NA = 4  
 Solvent = cdcl3  
 F1 = 399.749542 MHz  
 F2 = 100.526031 MHz

(E)-31-Weireb amide

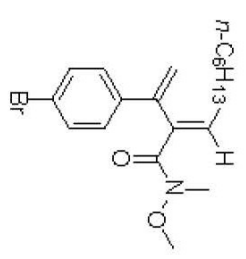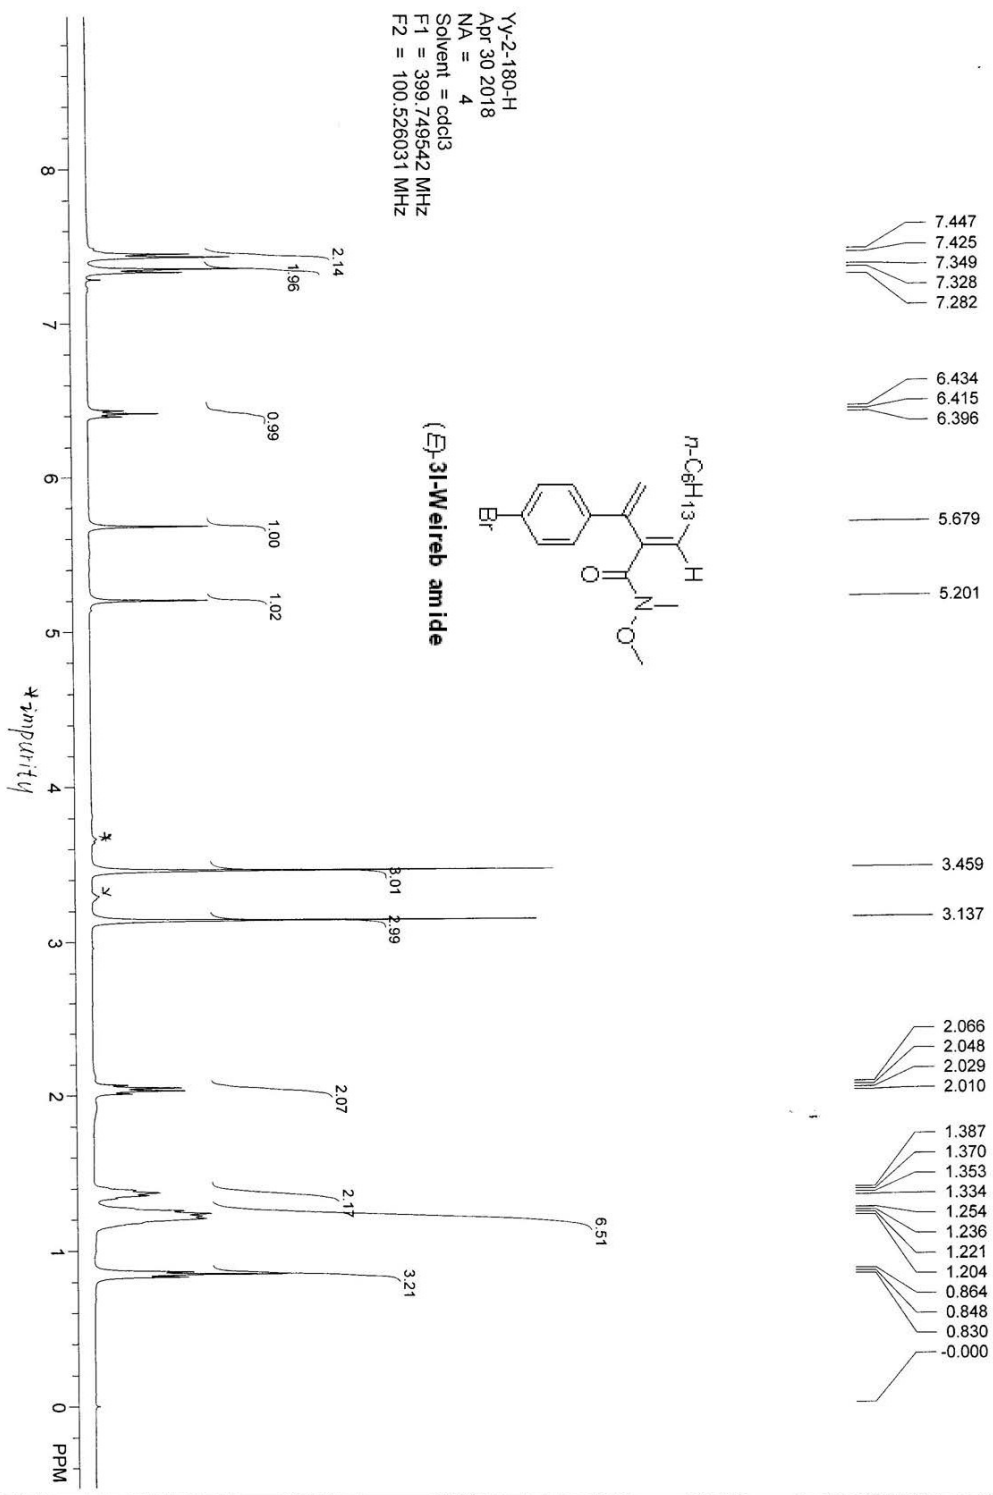

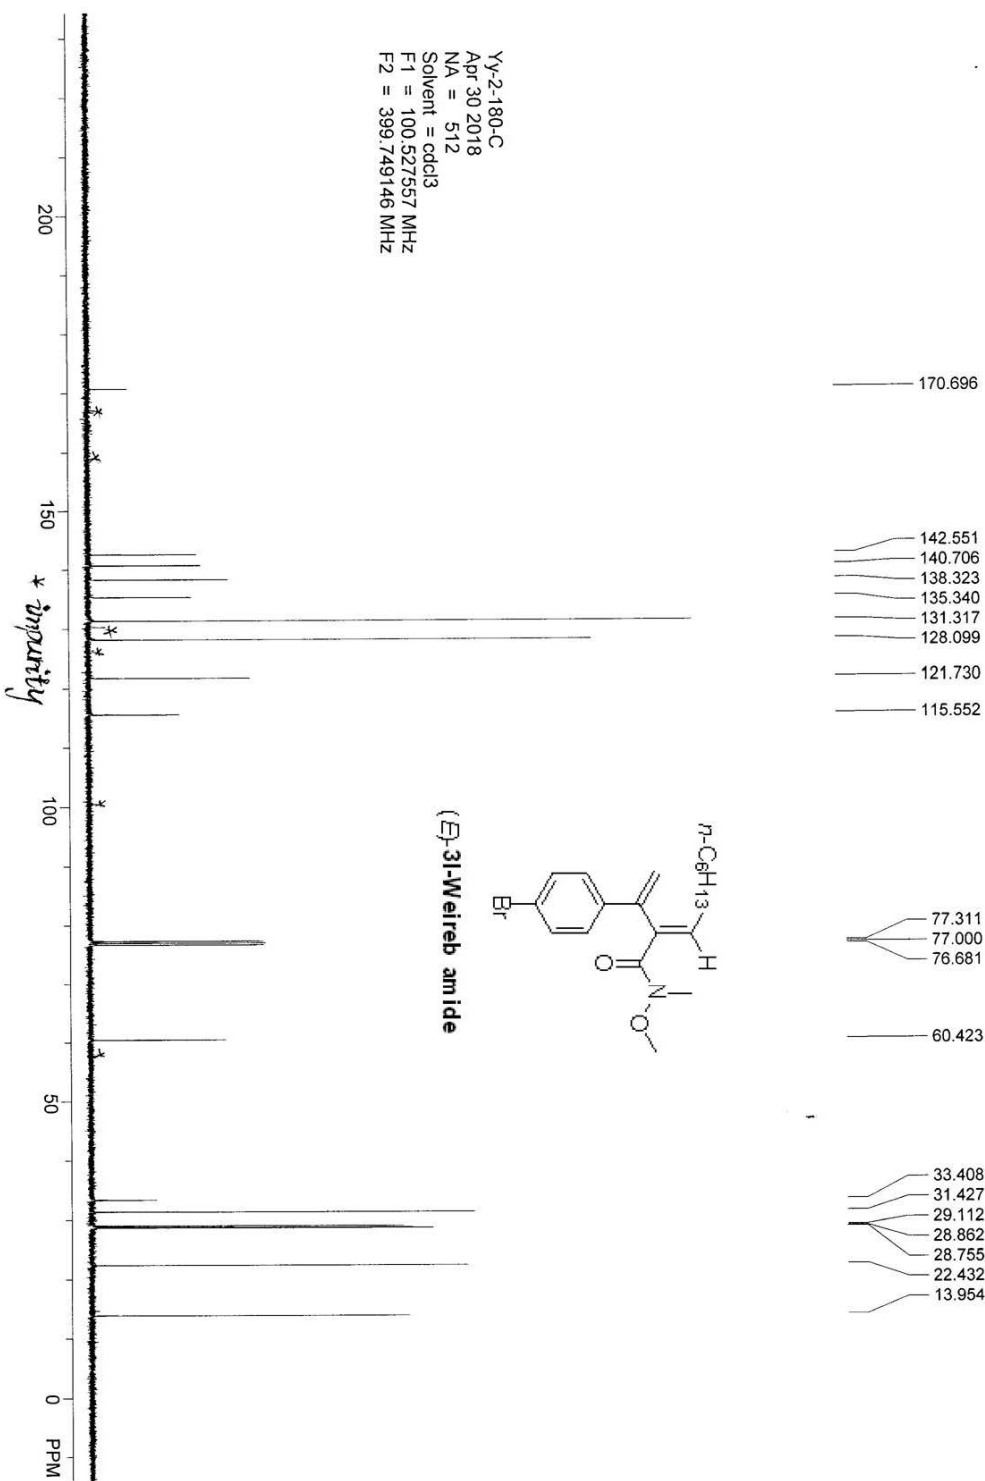

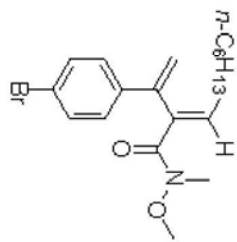

**(E)-31-Weireb amide**

Yy-2-180-purity  
 purity = 98%  
 45.2 mg product with 7 uL dibromomethane  
 Apr 30 2018  
 NA = 4  
 Solvent = cdcl3  
 F1 = 399.749542 MHz  
 F2 = 100.526031 MHz

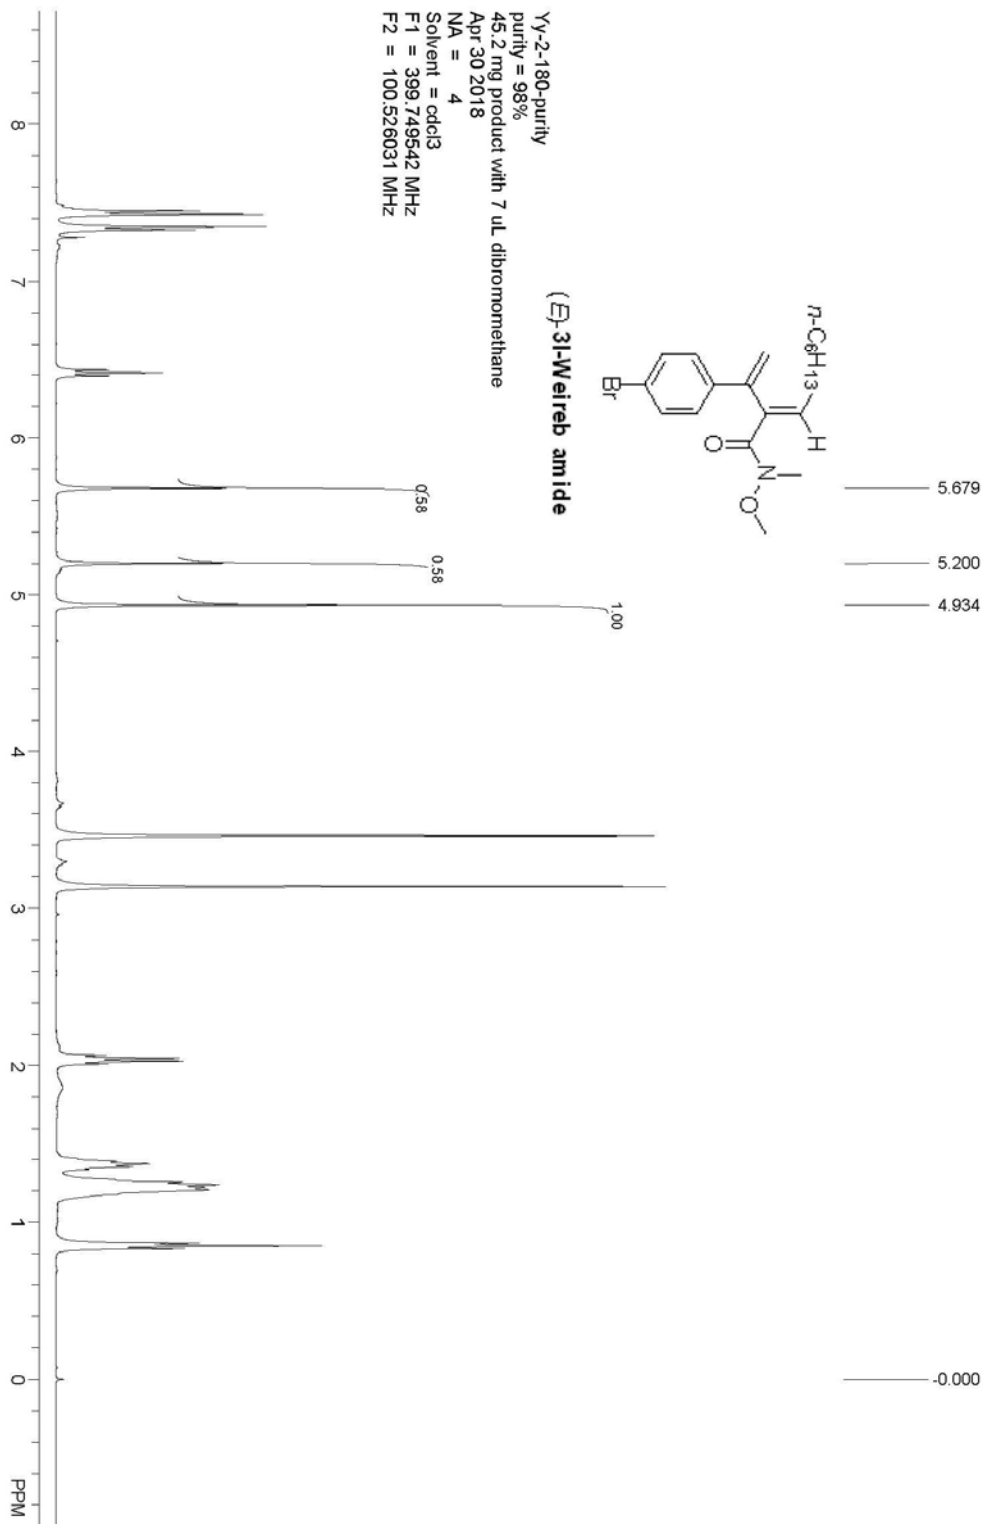

- 8.457
- 8.453
- 8.448
- 8.201
- 8.198
- 8.182
- 8.178
- 7.921
- 7.902
- 7.623
- 7.603
- 7.597
- 7.576
- 7.505
- 7.484
- 7.261
- 7.171
- 7.152
- 7.133
- 5.882
- 5.196
- 3.668
- 2.271
- 2.252
- 2.234
- 2.215
- 1.586
- 1.498
- 1.480
- 1.462
- 1.443
- 1.426
- 1.339
- 1.318
- 1.300
- 1.283
- 1.258
- 0.874
- 0.857
- 0.841
- 0.000

YY-2-141-H  
 Mar 28 2018  
 N/A = 8  
 Solvent = cdcl3  
 F1 = 399.749542 MHz  
 F2 = 100.526031 MHz

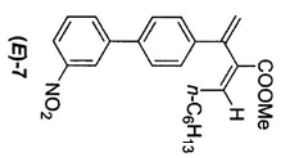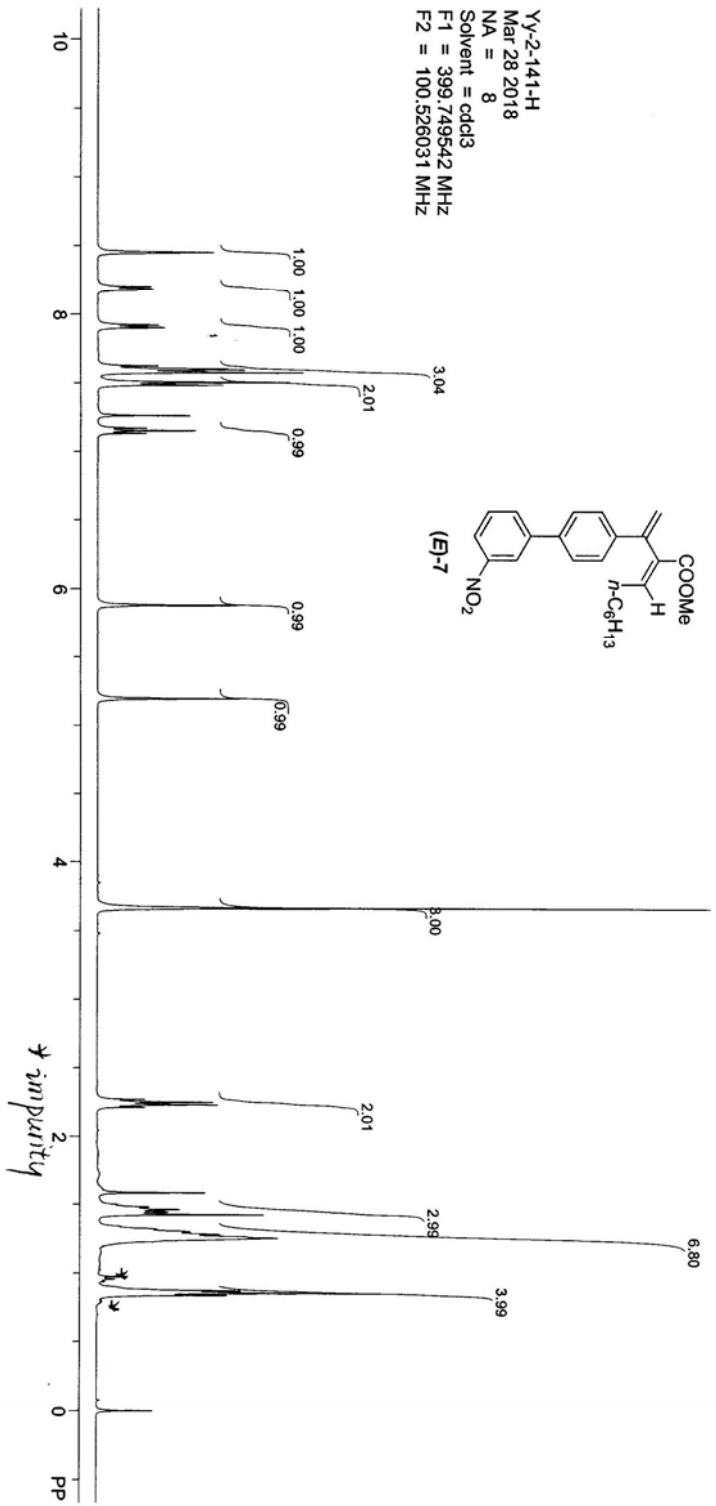

YY-2-141-C  
 Mar 28 2018  
 NA = 1000  
 Solvent = cdcl3  
 F1 = 100.527557 MHz  
 F2 = 399.749146 MHz

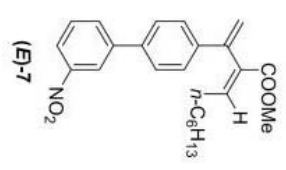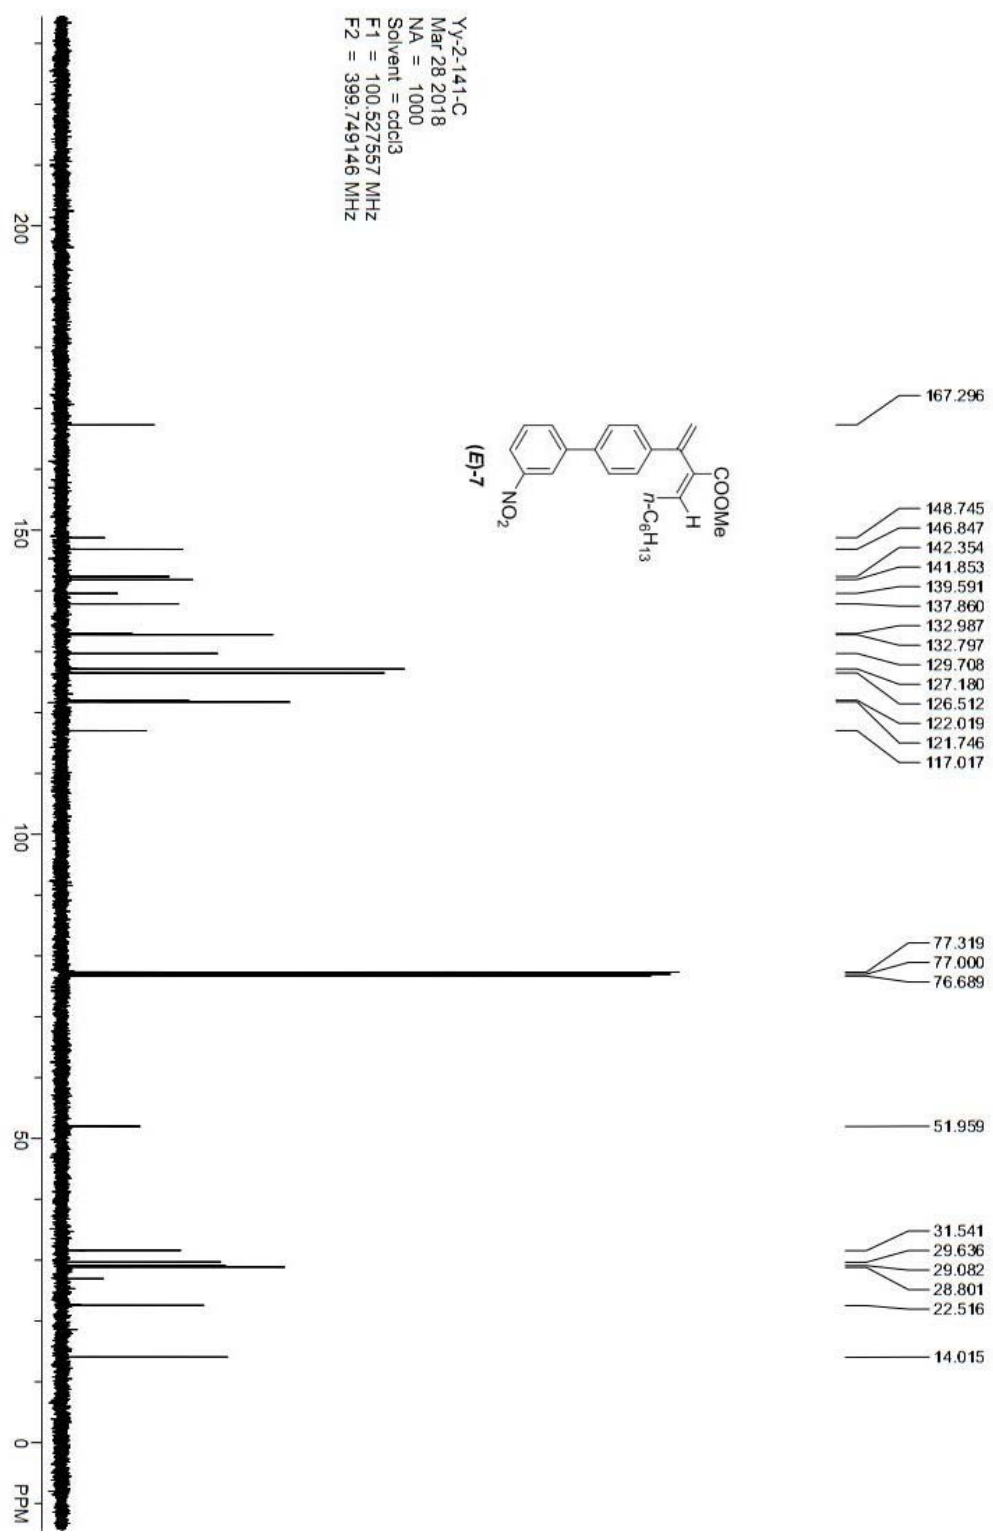



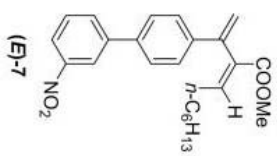

Yy-2-141-purity  
 purity = 94%  
 34.8 mg product with 17.5 uL dibromomethane  
 SOLVENT: CDCl<sub>3</sub>  
 NA = 8  
 Solvent = CDCl<sub>3</sub>  
 F1 = 400.130005 MHz  
 F2 = 1.000000 MHz

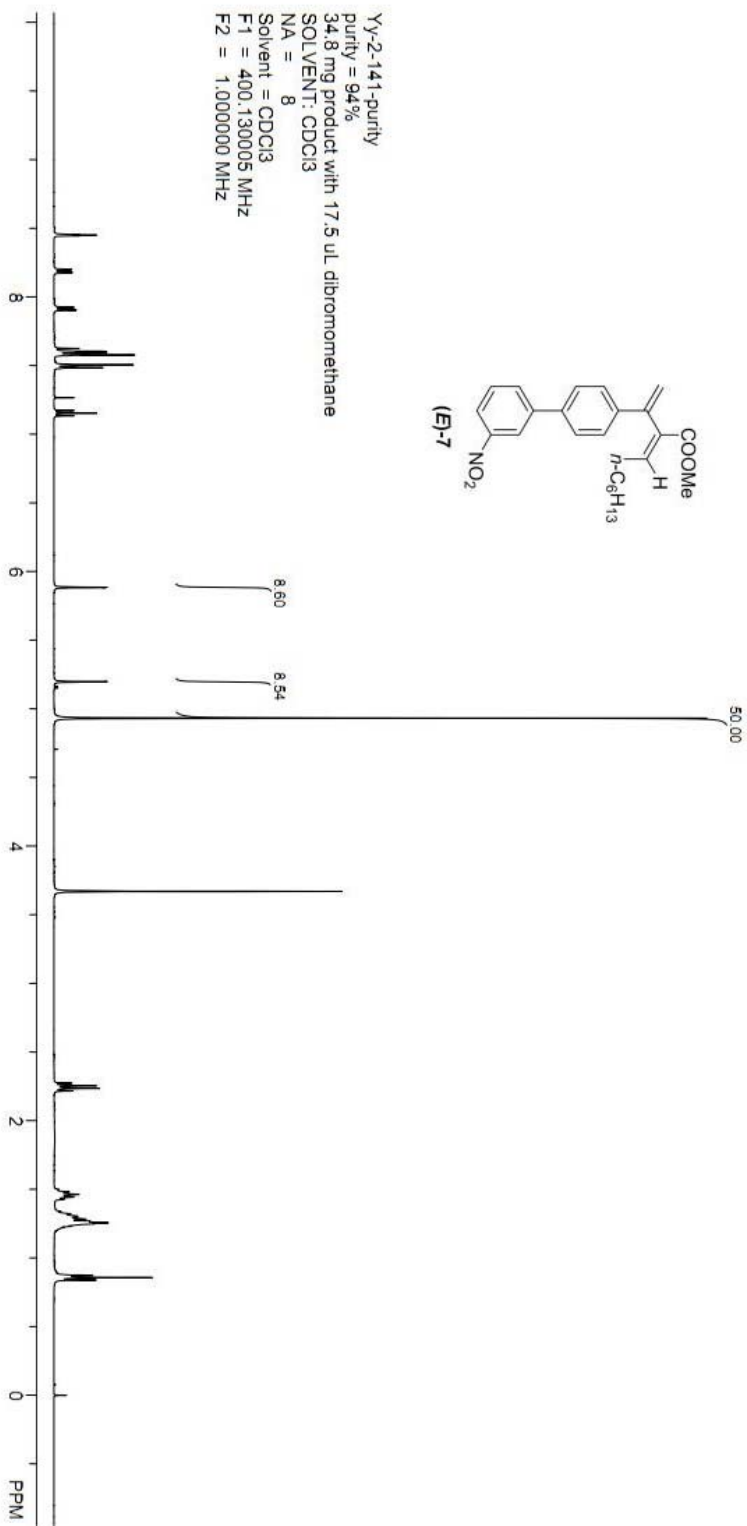

5.884  
5.882

5.197  
5.195  
4.930

0.000

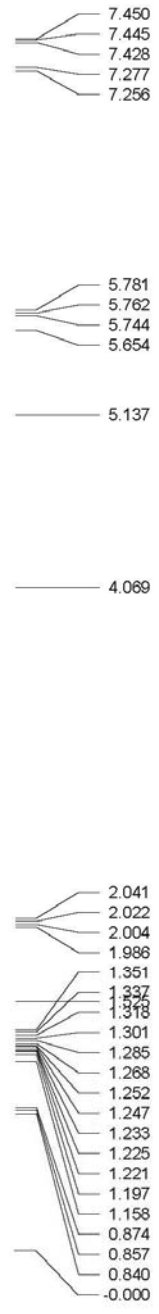

Yy-2-146-1-H  
Apr 3 2018  
NA = 8  
Solvent = cdcl3  
F1 = 399.749542 MHz  
F2 = 100.526031 MHz

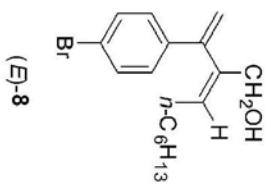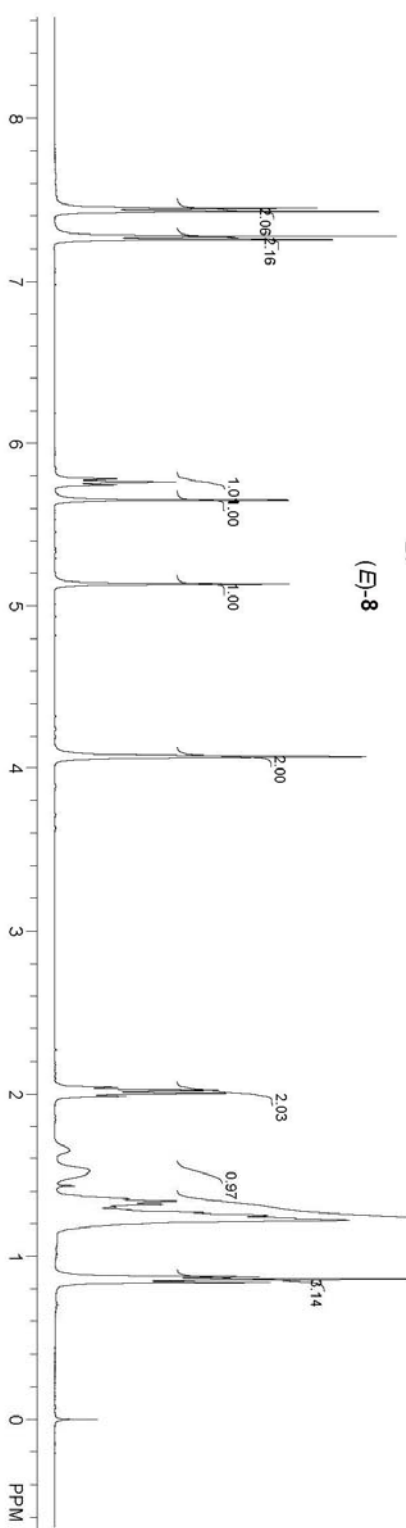

Yy-2-146-1-C  
Apr 4 2018  
NA = 512  
Solvent = cdcl3  
F1 = 100.527557 MHz  
F2 = 399.749146 MHz

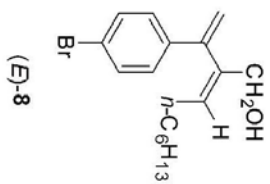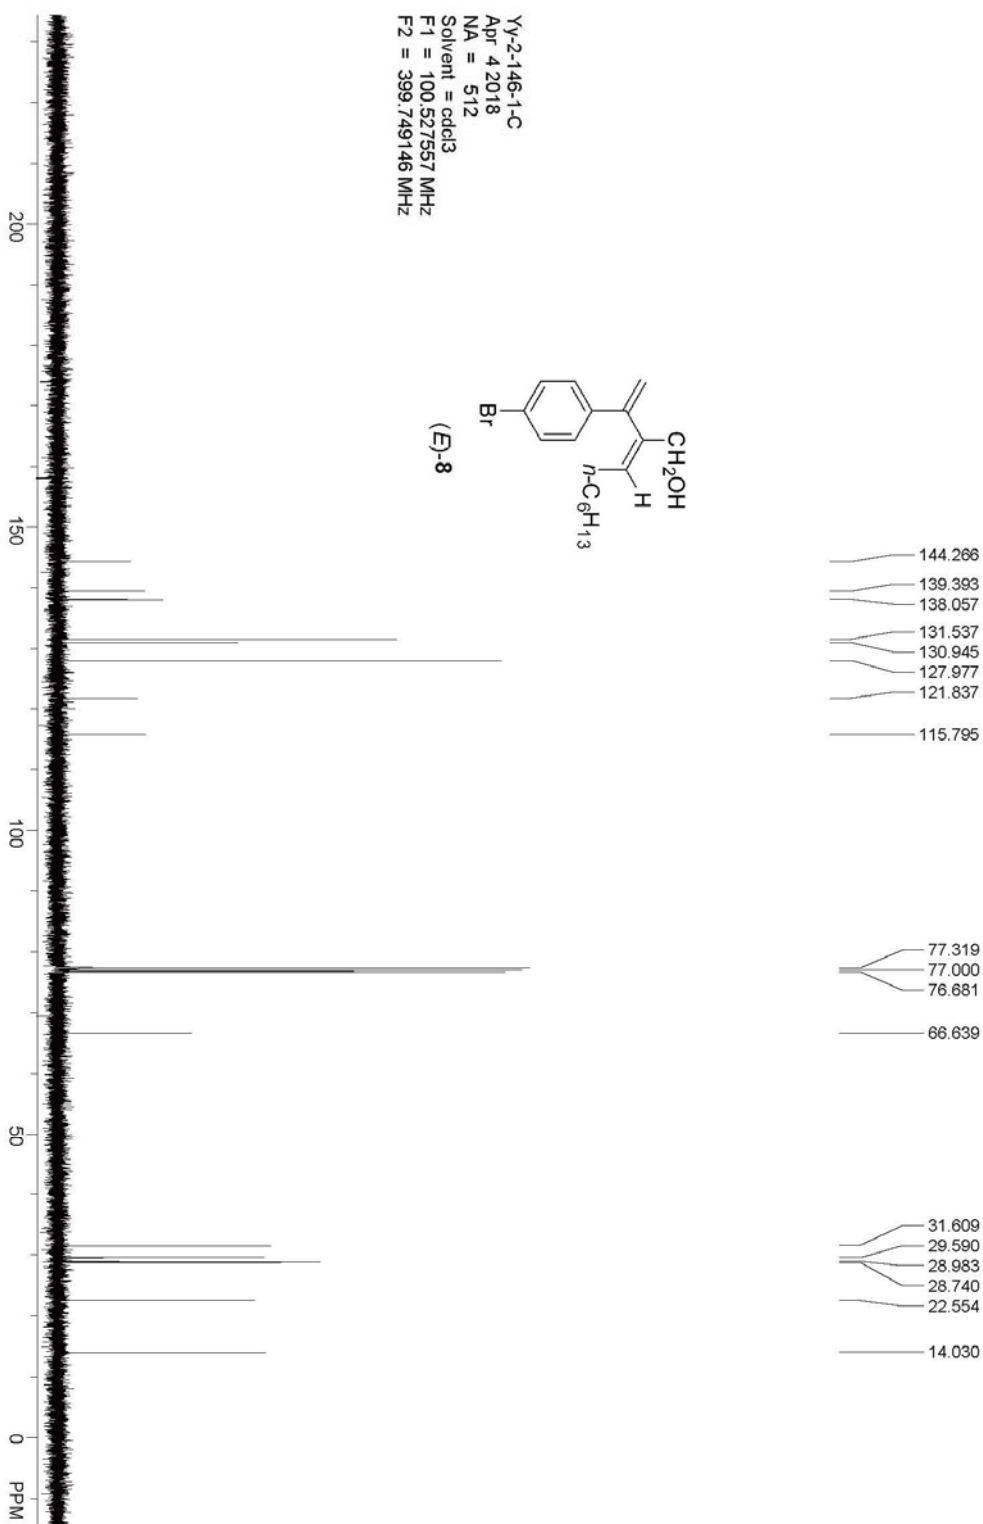

YY-2-183-H  
Apr 30 2018  
NA = 4  
Solvent = cdcl3  
F1 = 399.749542 MHz  
F2 = 100.526031 MHz

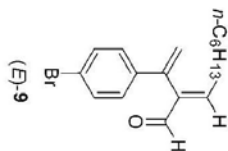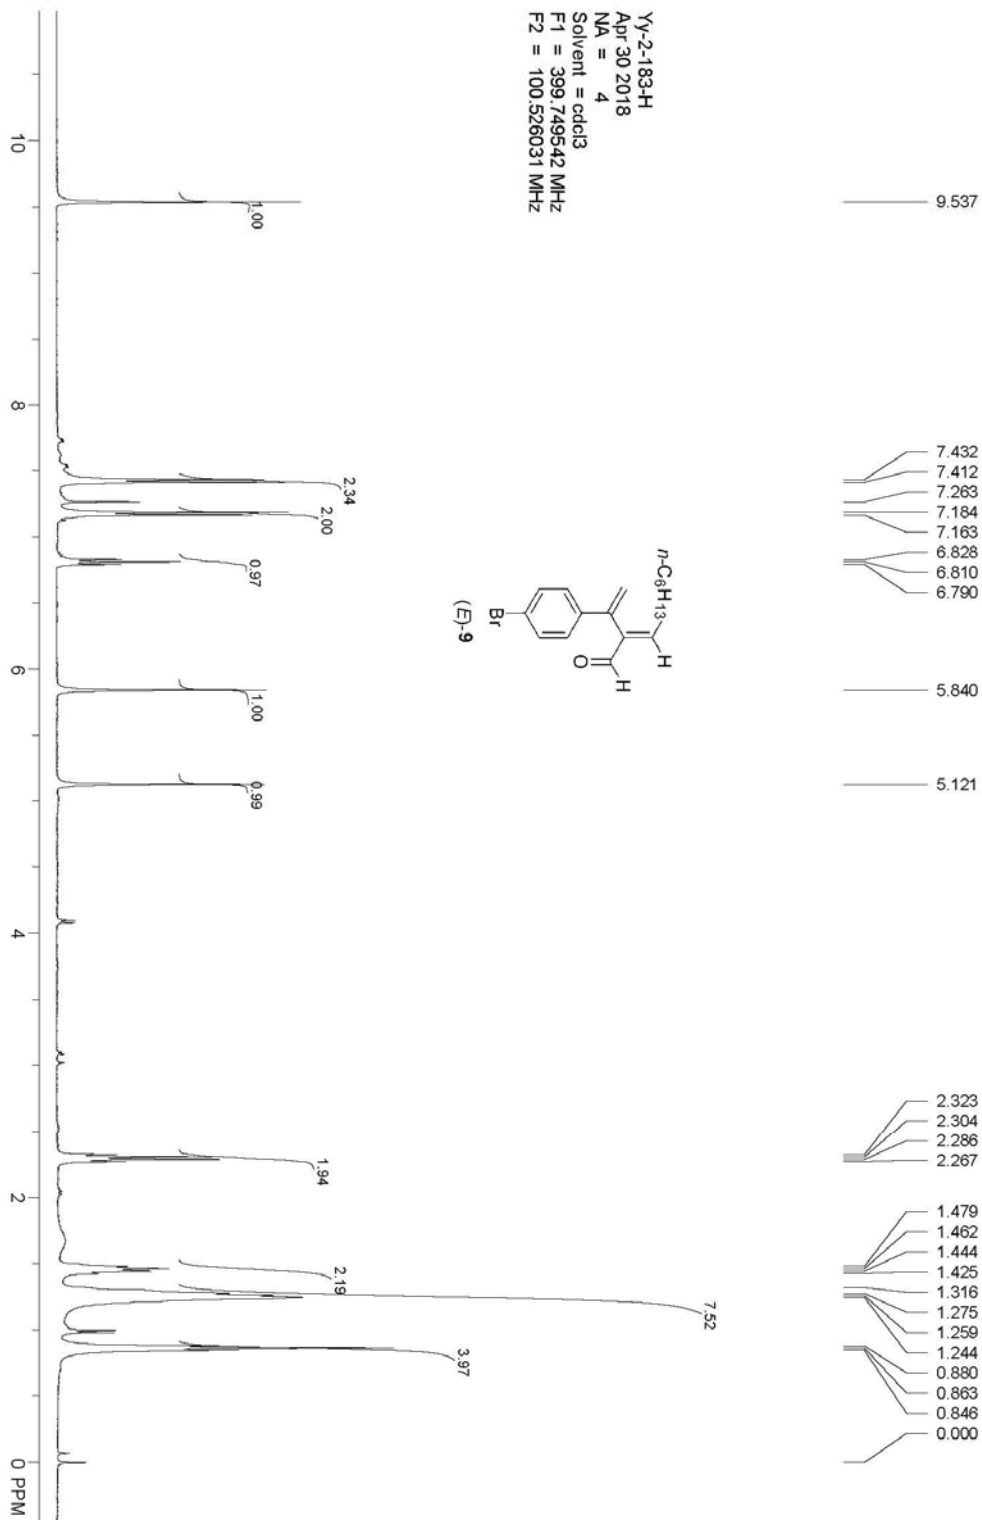

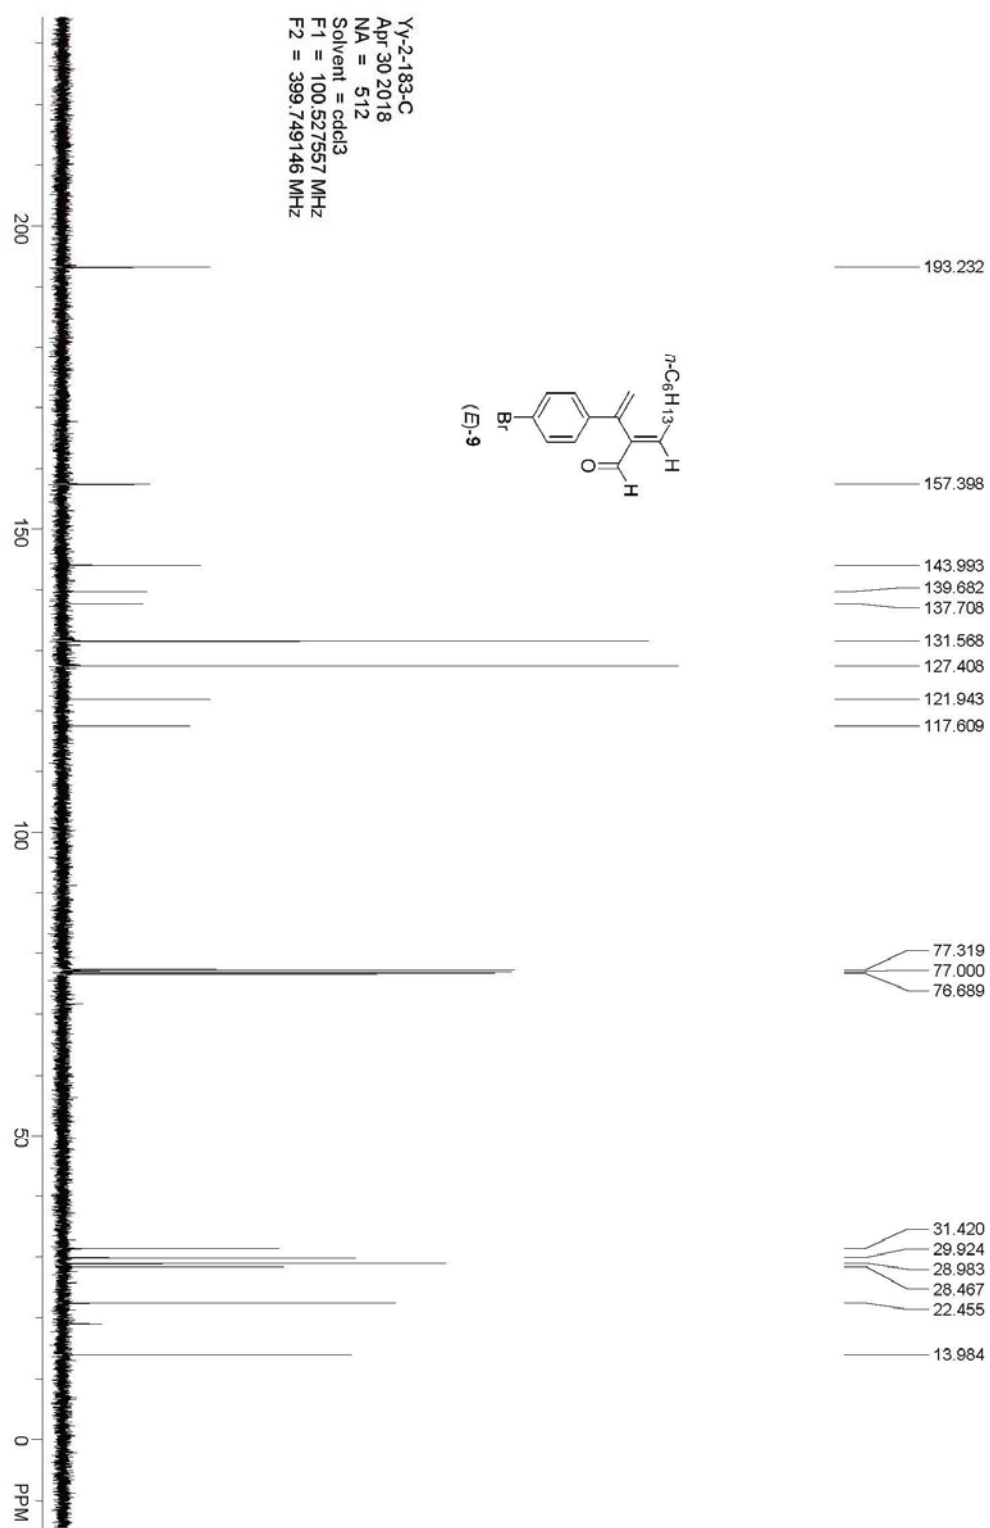

Yy-2-183-purity  
purity = 90%  
26.3 mg product with 7 uL dibromomethane  
Apr 30 2018  
NA = 4  
Solvent = cdcl3  
F1 = 399.749542 MHz  
F2 = 100.526031 MHz

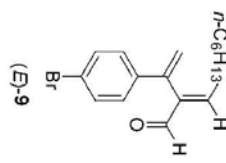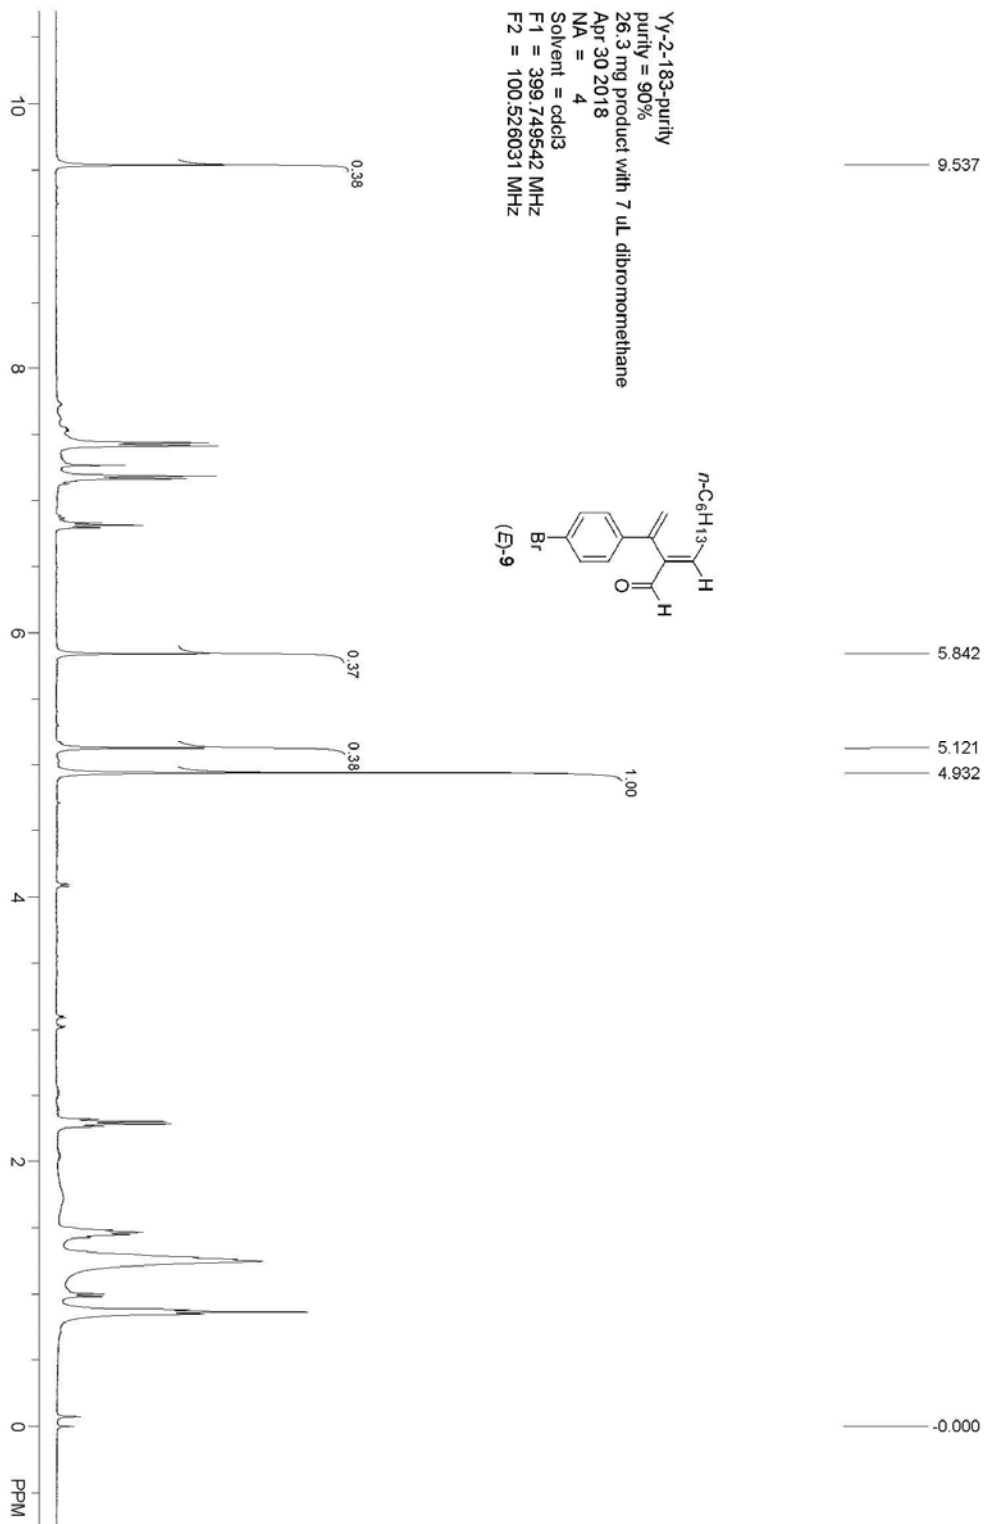

Supplement: c9cc03262b1.pdf [file c9cc03262b1.pdf]
